# Supplementary material for: Prognostic models for the clinical management of malaria and its complications: a systematic review
Source: PubMed Central journal article supplement — BMJ Open. 2019 Nov 26;9(11):e030793. doi: 10.1136/bmjopen-2019-030793 (PMC6887018; doi:10.1136/bmjopen-2019-030793), 2019-11-26
Supplement: bmjopen-2019-030793.draft_revisions.pdf [file bmjopen-2019-030793.draft_revisions.pdf]

# BMJ Open

BMJ Open is committed to open peer review. As part of this commitment we make the peer review history of every article we publish publicly available.

When an article is published we post the peer reviewers' comments and the authors' responses online. We also post the versions of the paper that were used during peer review. These are the versions that the peer review comments apply to.

The versions of the paper that follow are the versions that were submitted during the peer review process. They are not the versions of record or the final published versions. They should not be cited or distributed as the published version of this manuscript.

BMJ Open is an open access journal and the full, final, typeset and author-corrected version of record of the manuscript is available on our site with no access controls, subscription charges or pay-per-view fees (<http://bmjopen.bmj.com>).

If you have any questions on BMJ Open's open peer review process please email [info.bmjopen@bmj.com](mailto:info.bmjopen@bmj.com)

# BMJ Open

## Prognostic models for the clinical management of malaria and its complications: a systematic review

|                               |                                                                                                   |
|-------------------------------|---------------------------------------------------------------------------------------------------|
| Journal:                      | <i>BMJ Open</i>                                                                                   |
| Manuscript ID                 | bmjopen-2019-030793                                                                               |
| Article Type:                 | Research                                                                                          |
| Date Submitted by the Author: | 01-Apr-2019                                                                                       |
| Complete List of Authors:     | Njim, Tsi; Regional Hospital Bamenda, Surgical Department Tanyitiku, Bayee; University of Bamenda |
| Keywords:                     | malaria, prognostic model, prognostic score, mortality                                            |
|                               |                                                                                                   |

SCHOLARONE™  
Manuscripts

1  
2  
3 **Prognostic models for the clinical management of malaria and its complications: a systematic**  
4 **review**  
5

6  
7 **Authors:** Tsi Njim<sup>1</sup> & Bayee Swiri Tanyitiku<sup>2</sup>  
8

9 **Authors' information**  
10

11 <sup>1</sup> Health and Human Development (2HD) Research Network, Douala, Cameroon  
12

13 <sup>2</sup> Faculty of Social and Management Sciences, University of Bamenda, Bamenda, Cameroon  
14

15  
16 **\* Correspondence to:**  
17

18 Dr Tsi Njim, Health and Human Development Research Network, Douala, Cameroon. Email:  
19

20 [tsinjim@gmail.com](mailto:tsinjim@gmail.com). Phone number: +237 6774422905  
21  
22

23 **Email addresses**  
24

25 TN: [tsinjim@gmail.com](mailto:tsinjim@gmail.com) ; BST: [bstanyitiku@gmail.com](mailto:bstanyitiku@gmail.com)  
26  
27  
28  
29  
30  
31  
32  
33  
34  
35  
36  
37  
38  
39  
40  
41  
42  
43  
44  
45  
46  
47  
48  
49  
50  
51  
52  
53  
54  
55  
56  
57  
58  
59  
60

## Abstract

**Objective:** Malaria infection could result in severe disease with high mortality. Prognostic models and scores predicting severity of infection, complications and mortality could help clinicians prioritise patients. We conducted a systematic review to assess the various models that have been produced to predict disease severity and mortality of malaria.

**Design:** A systematic review

**Methods:** We searched the MEDLINE online databases for articles published up to 15<sup>th</sup> of February on models which used at least 2 points (or variables) of patient data.

**Primary Outcomes:** Prediction of disease severity; potential development of complications (including coma or cerebral malaria; shock; acidosis; severe anaemia; acute kidney injury; hypoglycaemia; respiratory failure and sepsis) and mortality in patients with malaria infection.

**Results:** A total of 537 articles were screened and 24 articles were retained describing 24 models/scores of interests. Three of the articles described models predicting complications of malaria (severe anaemia in children and development of sepsis); fifteen described original models predicting mortality in severe malaria; three described models predicting mortality in different contexts but adapted and validated to predict mortality in malaria; and three articles described models predicting severity of the disease.

For the models predicting mortality, all the models had neurologic dysfunction as a predictor; in children, half of the models contained hypoglycaemia and respiratory failure as a predictor meanwhile, six out of the nine models in adults had respiratory failure as a clinical predictor. Acidosis, renal failure and shock were also common predictors of mortality.

**Conclusion:** Evidence is lacking on the generalisability of most of these models due lack of external validation. Emphasis should be placed on external validation of existing models and publication of the findings of their use in clinical settings to guide clinicians on management options depending on the priorities of their patients.

**Key words:** malaria; prognostic model; prognostic score; mortality

### Article Summary:

#### Strengths and limitations of this review:

This review is the first to comprehensively summarise the various prognostic models that have been produced to identify complications, severity and risk of mortality in patients with severe malaria.

The review covers prognostic models produced worldwide and for all the various malaria species.

1  
2  
3 The review reduced the risk of bias by using an independent review process for the screening of  
4 potential articles and the extraction of data.  
5

6  
7 Considering the wide variety of statistical methods used to generate and validate these models, there  
8 is the risk of heterogeneity in interpretation of the results.  
9

## 10 11 12 13 **Introduction**

14  
15 Malaria is a disease caused by infection with a protozoan parasite of the genus *Plasmodium*. The most  
16 relevant of these species is *Plasmodium falciparum* as it causes most deaths from the disease <sup>1</sup>.  
17 Another species of relevance is *Plasmodium vivax* which is predominantly found in Asia and has a  
18 wider distribution <sup>2</sup>. This parasitic infection can result in severe disease and is associated with a high  
19 mortality. In about 108 countries where the transmission of the disease still occurs, an estimated  
20 429,000 people died in 2015 <sup>3</sup>.  
21  
22

23  
24  
25 The incidence of malaria cases has decreased by 41% worldwide in the past ten years, with about 17  
26 countries in Latin America and the Middle East reporting no new cases of malaria over this period <sup>3 4</sup>.  
27 There are however concerns that the fight against malaria might be slowed down by an overemphasis  
28 on prevention over treatment <sup>5</sup>.  
29  
30

31  
32 Treatment and clinical management of malaria is made difficult due to potential evolution of simple  
33 infections into life-threatening severe disease; the multi-organ affection of severe disease; the dilemma  
34 of when to admit to intensive care units (ICU) considering limited resources and the occurrence of  
35 concomitant sepsis infection with malaria <sup>6 7</sup>. Some of these issues can be addressed with the help of  
36 guidelines; scores or models that could help clinicians predict the occurrence of severe disease and  
37 complications in order to act appropriately.  
38  
39

40  
41  
42 We therefore conducted this review to systematically assess the various predictive models or scores  
43 available to guide clinicians in the management of severe malaria, whether these models have been  
44 validated and if there is any evidence that they are being successfully used in the clinical setting.  
45  
46

## 47 48 **Methods**

49  
50 Institutional review board approval and informed consent were not required for this systematic  
51 review. We reported our findings according to Preferred Reporting Items for Systematic Reviews and  
52 Meta-Analysis (PRISMA) guidelines (Appendix 1).  
53  
54

## 55 56 **Search strategy and selection criteria**

57  
58 We searched MEDLINE using a tailored search strategy (Appendix 2) to identify all the relevant titles  
59 and abstracts of studies (randomised control trials, cohort, cross-sectional and case-control studies)  
60

published in English from inception of the database up to the 15<sup>th</sup> of February 2019, that reported predictive/prognostic scores or models that could be used in the management of malaria. These included:

- Scores/models that predicted the severity of disease as this could guide clinicians decisions to admit for intensive care management or the use of parenteral treatment;
- Scores/models that predicted the potential development of complications (including coma or cerebral malaria; shock; acidosis; severe anaemia; acute kidney injury; hypoglycaemia; respiratory failure and sepsis);
- Scores/models that predicted mortality in patients with malaria infection.

The main keywords in the search strategy included: “prognostic model/score”, “predictive model/score” and “predictive value of tests” coupled with "malaria", "plasmodium", "anti-malarials", "malaria falciparum", "malaria vivax" and “clinical malaria”. Grey literature was obtained by identifying similar papers from the references of eligible papers.

We excluded any duplicate studies, editorials, systematic reviews, case studies, conference abstracts, unpublished studies and expert commentaries. For studies with more than one publication of findings, we selected the most recent publication.

We also excluded studies which contained models or scores that were aimed at the diagnosis of malaria as we intend to limit the scope of the study to only models that could be used to predict severity, mortality or risk of complications – that could guide clinicians in their management options.

Two independent reviewers (TN and BST) screened the titles and abstracts for compliance to the aforementioned inclusion and exclusion criteria and any conflicts were settled by mutual agreement. Articles considered to have data relevant to the topic were assessed in detail and the references cited in these publications were searched to identify further publications.

### **Data extraction**

Data extraction sheets which were prepared prior to screening were used by the two independent reviewers to obtain the following details for inclusion into the final review: Last name of first author; date of publication; period of patient recruitment and/or follow-up; country of study; sample size; age group; type of predictive model; name of model; method of validation; diagnostic properties of model and evidence of external validation or use in clinical setting.

### **Definitions**

By prognostic/predictive model, we mean a statistical tool which uses at least 2 points (or variables) of patient data to predict a specific clinical outcome<sup>8</sup>. Prognostic models applied in clinical settings are usually used at the discretion of physicians for accurate future predictions based on characteristics

1  
2  
3 gathered in the present <sup>8 9</sup>. The information found in prognostic models is usually specific to the patients'  
4 characteristics rather than the disease or treatment and includes: prediction of chance or the duration of  
5 survival; classification of patients into risk groups; and prediction of clinical events related to the  
6 treatment the patient is receiving <sup>10</sup>.  
7  
8  
9

10 For models that used the area under the curve (AUC) or c-statistic to assess discrimination, the following  
11 classification was used: 0.90 - 1 – excellent; 0.80 - 0.90 – good; 0.70 - 0.80 – fair; 0.60 - 0.70 – poor  
12 and 0.50 - 0.60 – very poor discriminative properties <sup>11</sup>.  
13  
14

### 15 **Data synthesis and analysis**

16  
17 We assessed and discussed the selected studies qualitatively to describe the diagnostic properties of  
18 the models proposed in the study, their intended purpose and evidence of use of the model in other  
19 clinical settings.  
20  
21  
22

23 We further divided the models into various categories: models used to predict a potential complication  
24 of severe malaria; models used to predict mortality as an outcome and models used to predict severity  
25 of malaria infection.  
26  
27

### 28 **Assessment of methodological quality and risk of bias**

29  
30 The quality of studies and the risk of bias were assessed by the two independent reviewers using the  
31 Quality Assessment Tool for Observational Studies of the National Health Institute/National Heart,  
32 Lung, and Blood Institute (Appendix 3a and 3b). Any disagreements were handled by mutual  
33 agreement.  
34  
35  
36  
37

### 38 **Patient and public involvement:**

39  
40 Patients and the public were not involved in the design and conduction of this review.  
41  
42  
43  
44

### 45 **Results**

46  
47 A total of 537 articles were identified by the electronic search of the database and grey literature. The  
48 titles and abstracts of these articles were screened to retain 58 articles for full text review. These were  
49 then evaluated according to the inclusion criteria and 24 articles were identified describing 24  
50 models/scores of interests; after eliminating 23 irrelevant articles, 9 articles which used only one  
51 variable to predict an outcome and two articles describing models in other languages (Figure 1). Three  
52 of the articles described models predicting complications of malaria <sup>7 12 13</sup>; fifteen described original  
53 models predicting mortality in severe malaria <sup>14-28</sup>; three described models predicting mortality in  
54 different contexts but adapted and validated to predict mortality in malaria <sup>29-31</sup>; and three articles  
55 described models predicting severity of the disease <sup>32-34</sup>.  
56  
57  
58  
59  
60

Using the Quality Assessment Tools for observational studies of the National Health Institute/National Heart, Lung, and Blood Institute; 22 of the articles were of “good quality” (score of 10 – 14 in quality assessment tool) <sup>7 12 14 16-30 32-35</sup> while the other two were of “fair quality” (score of 7 – 9 in quality assessment tool) <sup>13 15</sup> (Appendix 3a and 3b).

The general characteristics of the studies included in the review are summarised in Tables 1, 2 and 3.

### **Models predicting the risk of complications in malaria infection**

Two models predicted the risk of developing severe anaemia in children admitted for severe malaria <sup>12 13</sup>.

Webber *et al* <sup>13</sup> in 1997 conducted a study to predict the risk of severe anaemia (packed cell volume < 15%) in children with severe malaria in the Gambia using logistic regression analysis. This model was not validated, and the two predictors identified were pallor of the conjunctiva and pallor of the palms. Similarly, Brickley *et al* <sup>12</sup> in 2017 conducted a study in Tanzania and produced a model in children aged 0 – 4 years using clinical data and biomarkers collected at birth; which was used to prognosticate the risk of these children developing severe anaemia if they were infected with malaria. Severe anaemia was described as a Hb concentration < 50g/dl and predictors in the model identified after Cox proportional hazards analysis were sex, gravidity, transmission season at delivery, and bed net possession. The model was internally validated using bootstrapping with a modest predictive ability (C-index of 0.77); and the authors postulated that this model could help identify a high-risk group of infants at birth who could be selected for targeted malaria intervention. There is no evidence from this review that both models have been externally validated and are being used in clinical settings.

In 2018, Njim *et al* <sup>7</sup> described a prognostic model for clinical use to predict the risk of sepsis development amongst adult patients (> 16 years old) admitted for severe falciparum malaria in Southeast Asia. They used data from SEQUAMAT (South East Asian Quinine Artesunate Malaria Trial) – a large randomised control trial (RCT) conducted to determine the benefits of intravenous artesunate over quinine treatment for severe malaria. They used a multivariable logistic regression approach with internal validation using bootstrapping to generate a prognostic model with modest discriminative abilities (AUC: 0.789) with the following predictive variables: female sex, high blood urea nitrogen, high plasma anion gap, respiratory distress, shock on admission, high parasitaemia, coma and jaundice. The model has not been externally validated and there is no evidence of use in clinical settings.

### **Models predicting mortality in severe malaria**

#### ***Models predicting mortality in paediatric severe malaria***



1  
2  
3 Ten articles described models that predicted mortality in paediatric severe malaria <sup>14 18-21 25 26 28-30</sup>.

4 Three articles described models which predicted mortality in paediatric patients with cerebral malaria  
5 <sup>14 19 25</sup>; two articles described models generated to assess mortality in different conditions that were  
6 validated for use in the present studies <sup>29 30</sup>; and five articles described original models predicting the  
7 risk of mortality in children with severe malaria <sup>18 20 21 26 28</sup>.

### 11 ***Models predicting mortality in paediatric cerebral malaria***

12  
13  
14 Molyneux *et al* <sup>25</sup> in 1989 conducted a study amongst 131 comatose Malawian children with severe  
15 malaria to determine the prognostic factors for death in these patients. The authors derived a “bedside  
16 prognostic index” with: blood glucose  $\leq 2.2$  mmol/L; parasitaemia  $> 106$  ring forms/ $\mu$ L; white blood  
17 cell count  $> 15 \times 10^9$ /L; age  $\leq 3$  years; coma score (modification of the Glasgow coma score) = 0;  
18 absent corneal reflexes; signs of decerebration and convulsions; as predictors of mortality with each  
19 predictor assigned a score of 1. Individuals with a score  $\geq 4$  were more likely to die. This score was  
20 calculated only using univariable analysis and internal and external validation were not done.

21  
22  
23 In 1997 in Gambia, Jaffar *et al* <sup>19</sup> performed a retrospective analysis on data obtained from a  
24 randomised control trial during which artemether was compared with quinine and a monoclonal  
25 antibody against tumour necrosis factor (TNF) compared with a placebo in patients with cerebral  
26 malaria. They used this data to identify predictors of mortality in cerebral malaria using a  
27 multivariable logistic regression model. A cold periphery, a coma score of either 0 or 1 (assessed  
28 using the Blantyre coma scale), and hypoglycaemia were found to be present at admission in 90% of  
29 the children who died. This model was not validated.

30  
31  
32 Conroy *et al* <sup>14</sup> in 2012 conducted a study amongst 155 children aged 8 months – 14 years in Malawi  
33 to determine predictors of mortality in cerebral malaria. They used a multivariable logistic regression  
34 model containing clinical parameters and biomarkers with a modest discriminative ability (C-index of  
35 0.79) after internal validation; which contained the following variables: age, Blantyre coma score,  
36 respiratory distress, severe anaemia, angiopoietin-1, angiopoietin-2 and sTie-2 levels. The model was  
37 not externally validated.

### 38 ***Original models predicting mortality in paediatric severe malaria***

39  
40  
41 Krishna *et al* <sup>20</sup> in 1994 conducted a study in the Gambia to predict mortality in children aged 8  
42 months to 14 years. They used a multivariable logistic regression model internally validated using the  
43 Wald statistic to determine that the coma score (using the Blantyre coma scale), whole blood  
44 lactate/glucose ratio and TNF level were the best predictors of death.

45  
46  
47 In 1995, Marsh *et al* <sup>21</sup> studied 1844 children in Kenya to determine predictors of life-threatening  
48 malaria (risk of death) using a multivariable logistic regression model without any validation. They  
49  
50  
51  
52  
53  
54  
55  
56  
57  
58  
59  
60

determined that impaired consciousness (assessed using the Blantyre coma scale), hypoglycaemia, respiratory distress and jaundice could correctly predict 84.4% of deaths in the sample population.

In 2005, Newton *et al*<sup>26</sup> conducted a study to assess the prognostic value of measures of acid/base balance in paediatric falciparum malaria. They examined 14,605 children in Malawi (Blantyre), Kenya (Kilifi) and Ghana (Kumasi) where they determined that deep breathing, Blantyre Coma Score of 2, inability to sit, and weight-for-age Z score were independent predictors of mortality in all the three sites. Discrimination of the model was performed by calculating the area under the receiver operating curve (AUROC). After addition of laboratory data to these models – hypoglycaemia, base excess and lactate concentrations, the c-statistics obtained were 0.88 (Blantyre), 0.87 (Kilifi) and 0.83 (Kumasi) denoting good discriminative properties of the models.

Helbok *et al*<sup>18</sup> in 2009 produced the the Lambarene Organ Dysfunction Score (LODS) which combined three variables: coma, prostration, and deep breathing to generate a model using multivariable logistic regression which predicted death in African children – Banjul (Gambia), Blantyre (Malawi), Kilifi (Kenya), Kumasi (Ghana), and Lambarene and Libreville (Gabon); who were admitted for severe falciparum malaria. Each component of the model was assigned a score of 1 and a LODS of 3 at admission had a 98% specificity and 25% sensitivity in predicting death. Meanwhile a LODS  $\geq 1$  had a sensitivity of 85% and a specificity of 63%. The model had good discriminative properties with an AUC of 0.80 (95% CI: 0.79 – 0.82). In 2015, Conroy *et al*<sup>29</sup> externally validated this model amongst 1589 Ugandan children. The model showed good discriminative properties with an AUC of 0.898.

Similarly, in 2012, von Seidlein *et al*<sup>28</sup> conducted an analysis of data from a RCT carried out in several African countries (Gambia, Mozambique, Nigeria, Rwanda, Kenya, DRC, Tanzania, Ghana and Uganda) to generate a model for predicting mortality from severe falciparum malaria using multivariable logistic regression analysis and internally validated by AUROC analysis. After analysis of data from 5426 children, base deficit, impaired consciousness (assessed using the Blantyre Coma Score), convulsions, elevated blood urea, and underlying chronic illness were identified in the model to predict mortality with a good discriminative ability – AUROC: 0.85 (95% CI: 0.83 - 0.87).

### ***Models predicting mortality validated for use in severe malaria in children***

As described above, Conroy *et al*<sup>29</sup> externally validated the LODS model amongst 1589 Ugandan children. The authors further externally validated two other scores: the SICK (Signs of Inflammation in Children that Kill) score which was developed in India as a practical triage tool using variables related to the systemic inflammatory response syndrome, with data collected from 1,099 children in 2003 admitted for any paediatric illness<sup>36</sup>; and the PEDIA (Pediatric Early Death Index for Africa) score which was developed to predict early death amongst 8091 children in Kenya in 2003 admitted for paediatric illnesses<sup>37</sup>. The original SICK score containing the following variables: altered

1  
2  
3 consciousness, temperature, heart rate, respiratory rate, systolic blood pressure, capillary refill time  
4 and age; had good discriminative properties with an AUC of 0.887<sup>36</sup>. Externally validated against this  
5 cohort of 1589 children, the score maintained its good discriminative properties with an AUC of  
6 0.846. Similarly, the PEDIA score which originally had excellent discriminative properties with an  
7 AUC of 0.93<sup>37</sup> had good discriminative properties (AUC: 0.896) when externally validated on the  
8 cohort of 1589 Ugandan children<sup>29</sup>. The original PEDIA score contained Kwashiorkor, jaundice,  
9 subcostal indrawing, prostration ( $\pm$  seizures) and wasting as variables in the model. However,  
10 kwashiorkor was not included in the validation model as it was not measured amongst the Ugandan  
11 children.  
12  
13  
14  
15  
16  
17

18 In 2006, Gerardin *et al*<sup>30</sup> validated the PRISM (Pediatric Risk of Mortality) model which was  
19 originally developed in 1988 by Pollack *et al*<sup>38</sup> to reduce the number of physiologic variables  
20 required for paediatric intensive care unit death risk assessment. The model was developed from data  
21 of 1,227 patients with 105 deaths and contained 14 variables: systolic blood pressure, temperature,  
22 mental status, heart rate, dilatation of pupils, pH, total CO<sub>2</sub>, PCO<sub>2</sub>, arterial PaO<sub>2</sub>, serum glucose,  
23 potassium, urea, creatinine, white blood cells, prothrombin time, platelet count. The original score had  
24 excellent discriminative properties with an AUC of 0.92<sup>38</sup>. Gerardin *et al* used a cohort of 311  
25 Senegalese children admitted with severe malaria to externally validate this model. The model  
26 showed good discriminative properties in predicting death in children with severe malaria – AUC:  
27 0.86 (95% CI: 0.81– 0.90)<sup>30</sup>.  
28  
29  
30  
31  
32  
33  
34

### 35 **Models predicting mortality in adult severe malaria**

36 There were eight articles assessing models that predicted mortality in adult severe malaria<sup>15-17 22-24 26</sup>  
37  
38  
39  
40

41 In 1995, Wilairatana *et al*<sup>35</sup> used the APACHE II score (the acute physiology and chronic health  
42 evaluation system score commonly used in intensive care units) based on 12 physiologic variables -  
43 MAP, temperature, heart rate, respiratory rate, arterial pH, PaO<sub>2</sub>, haematocrit, WBC count, creatinine,  
44 sodium, potassium and Glasgow coma score to predict the risk of mortality in adult patients with  
45 cerebral malaria in Thailand. The score was able to predict mortality with a 95.8% accuracy.  
46  
47  
48

49 Dondorp *et al*<sup>15</sup> in 2004 created a model using logistic regression with laboratory data from 268  
50 patients in Vietnam to determine the risk of mortality in adult patients with severe malaria. This  
51 model had a good discriminative value with an AUROC of 0.81. The laboratory variables associated  
52 with mortality in this cohort were: plasma lactate, plasma creatinine and a strong anion gap. On the  
53 other hand, in 2007, Mishra *et al*<sup>22</sup> created the MSA (Malaria score for adults) and the MPS (Malaria  
54 prediction score) from a cohort of 212 patients in India to predict mortality in severe malaria. The  
55 MSA was an upgrade of the MPI which required laboratory data and included a small proportion of  
56 children. The clinical variables included in the MSA were: severe anaemia, acute renal failure,  
57  
58  
59  
60

1  
2  
3 respiratory distress and cerebral malaria and had a sensitivity of 89.9% and a specificity of 70.6%.  
4 This model was validated by Santos *et al*<sup>39</sup> among 59 patients with imported severe malaria in  
5 Portugal and was shown to have good discriminative properties – AUROC: 0.84; 95% CI: 0.70 –  
6 0.98.  
7  
8

9  
10 Similarly, Hanson *et al*<sup>16</sup> produced the coma acidosis malaria (CAM) score after using a logistic  
11 regression analysis on data previously collected from the SEQUAMAT. The authors proposed the use  
12 of the presence of a coma and base deficit to calculate a five-point score to predict mortality. The  
13 score had good discriminative properties with an AUROC of 0.81 (95% CI: 0.77 – 0.84). The same  
14 author used data from several cohort studies and RCTs carried out in Bangladesh, India, Indonesia,  
15 Vietnam and Myanmar to predict 48-hour survival and survival to discharge in patients with severe  
16 malaria<sup>17</sup>. The model containing the variables: shock, oligo-anuria, dysglycaemia, respiratory rate,  
17 Glasgow coma score and fever could correctly predict 48 hour-survival in 99.4% of the patients and  
18 survival to discharge in 96.9% of patients.  
19  
20

21  
22 Mohapatra *et al*<sup>24</sup> in 2009 carried out a cohort study of 2089 patients in 2009, where they produced  
23 the Malaria severity score (MSS) to predict mortality in adult patients with severe falciparum malaria  
24 in India. They assessed seven organ systems: neurologic, renal, haematologic, hepatic, respiratory,  
25 cardiovascular, and metabolic organ systems; assigning a maximum score of 0 – 3 for each organ  
26 system. The model had excellent discriminative properties with an AUROC of 0.9. The authors also  
27 developed the GCRBS (Glasgow coma scale, creatinine, respiratory rate, bilirubin and systolic BP)  
28 score in 2014 as an alternative to other scores like the APACHE II score which was considered  
29 cumbersome<sup>23</sup>. The score had a sensitivity of 85.3% and a specificity of 95.6% in predicting a fatal  
30 outcome in severe malaria.  
31  
32

33  
34 In 2013 in Thailand, Newton *et al*<sup>27</sup> conducted a retrospective analysis of 988 records with severe  
35 falciparum malaria to produce the MPI (Malaria prognostic index) validated using ROC curve  
36 analysis and internal validation by data splitting. The MPI contained the following variables: Glasgow  
37 coma scale, parasitaemia, plasma lactate, serum bilirubin, pigmented parasites and treatment with  
38 ACT and had excellent discriminative properties with an AUROC of 0.97.  
39

#### 40 **Models predicting the severity of malaria**

41  
42 The Multi-organ dysfunction score (MODS) which is an index used in severely ill patients admitted in  
43 intensive care units to determine the severity of their disease irrespective of the diagnosis<sup>32,40</sup>. The  
44 score evaluates ten organ systems: heart, blood vessel, blood, respiratory system, metabolism,  
45 gastrointestinal system, liver, kidney and urinary tract, immune system, and central nervous system –  
46 giving a score of 1 – 5 for each system depending on the level of dysfunction of the system, with a  
47 minimum score of 10 and a maximum score of 50<sup>33</sup>. Helbok *et al* assessed the use of this score to  
48 predict severity in a small cohort (n = 22) of adult patients with uncomplicated falciparum malaria<sup>33</sup>  
49  
50  
51  
52  
53  
54  
55  
56  
57  
58  
59  
60

1  
2  
3 and in adults with severe malaria ( $n = 29$ )<sup>32</sup> in Thailand. The score was not validated in both studies  
4 but the authors showed that higher scores were correlated with symptom severity and duration of  
5 hospitalisation. In 2006, the authors used a simplified version of the score - Simplified MODS  
6 (sMODS); in a cohort of 485 children in Gabon to predict the level of severity of the disease with  
7 respect to the amount of disability the children suffered into categories: ability to walk unaided and  
8 ability to sit unaided<sup>34</sup>. The authors obtained an AUC of 0.92 (95% CI, 0.89–0.95) in predicting  
9 inability to walk  $\geq 48$  hours for children with sMODS  $\geq 16$  and an AUC of 0.90 (95% CI, 0.87–0.93)  
10 in predicting inability to sit unaided.  
11  
12  
13  
14  
15

## 16 **Discussion:**

17  
18 In this review, we report on the various prognostic models and scores produced to predict complications,  
19 mortality and severity of malaria infection. We showed that there were three models produced to predict  
20 the risk of developing complications from malaria infection, twelve models that predict mortality from  
21 severe malaria in children, nine models that predict mortality from severe malaria in adults and three  
22 models that predict disease severity in malaria. Seventeen of these models were internally validated  
23 while only seven have been externally validated. There is no published evidence that any of these  
24 models are routinely used in clinical settings.  
25  
26  
27  
28  
29

30 There have been several prognostic models generated in literature, some of which have made their way  
31 into daily clinical practice. Prognostic models are particularly useful in diseases with dire outcomes.  
32 An example is meningitis where accurate diagnosis of the causative organism and patient stratification  
33 could lead to appropriate treatment and initiation of adequate supportive measures. Models have been  
34 produced to accurately differentiate tuberculous meningitis from other forms of pyogenic  
35 meningoencephalitis<sup>41</sup>, to predict unfavourable outcomes in adults admitted for bacterial meningitis<sup>42</sup>  
36 and to determine mortality in patients admitted with meningitis six weeks after follow-up in a resource-  
37 limited setting<sup>43</sup>. Other commonly recognised prognostic scores used routinely in clinical settings  
38 include the APGAR score which is used at birth to predict the development of future neurological  
39 complications in children.  
40  
41  
42  
43  
44  
45

46 The models identified in this review that were used to predict mortality in children with severe malaria  
47 have similar clinical predictors. All the models had neurologic dysfunction based on either the Glasgow  
48 coma score, impaired consciousness, altered mental status, convulsions, decerebration or coma as a  
49 predictor. Similarly, in adults, all the models predicting mortality also had neurologic dysfunction as a  
50 predictor. Microvascular obstruction in capillaries of the brain due to direct sequestration of red blood  
51 cells infected with the malaria parasite lead to tissue hypoxia<sup>44</sup>. The effects of this sequestration and its  
52 sequelae in the brain can be directly visualised in both adults and children as retinopathy<sup>14 44-46</sup>. This  
53 leads to varied results with increased intracranial pressure more pronounced in children than in adults  
54  
55  
56  
57  
58  
59  
60

1  
2  
3 44. With the increased oxygen demand associated with brain hypoxia and raised intracranial pressure,  
4 coma and brain dysfunction become an important predictor of mortality.  
5  
6

7 In children, half of the models predicting mortality had hypoglycaemia as a predictor <sup>19-21 25 26 30</sup>.  
8 Hypoglycaemia is usually implicated as a complication of severe malaria infection. This association  
9 has been said to be multifactorial <sup>47</sup>. Proposed mechanisms for this association include: increased  
10 glucose use by the malaria parasites in the red blood cells, inhibition of gluconeogenesis by the cascade  
11 of cytokines released due to infection and prolonged starvation and fasting especially in severely ill  
12 children further compounds the problem <sup>47 48</sup>. Considering that glucose is the primary source for organs  
13 like the brain which is likely suffering from the above highlighted effects of microvascular obstruction  
14 and sequestration, depleted glucose sources could lead to neurologic dysfunction including seizures,  
15 deepening comas and hence death.  
16  
17  
18  
19  
20  
21

22 Half of the models in children predicting mortality had respiratory distress (including deep breathing  
23 and subcostal indrawing) as a predictor <sup>14 18 21 26 29</sup>. Meanwhile six out of the nine models in adults had  
24 respiratory failure as a clinical predictor of mortality <sup>17 22 24 35</sup>. The incidence of respiratory distress in  
25 severe malaria is quite common as it occurs in about 40% of children with severe falciparum malaria  
26 and in 25% of adults <sup>49</sup>. It results from acute respiratory distress syndrome (ARDS); metabolic acidosis;  
27 fluid overload possibly resulting from increased inflammatory related capillary permeability and  
28 endothelial damage <sup>7 49</sup>; and aspiration pneumonia which could lead to sepsis <sup>7</sup> – a common association  
29 with severe malaria. The high mortality rates (up to 87% in some cases) associated with respiratory  
30 failure like in ARDS <sup>50</sup> could explain the prognostic significance of respiratory distress in predicting  
31 mortality in malaria infection.  
32  
33  
34  
35  
36  
37

38 Acidosis was also a prominent predictor of mortality in most of the models predicting mortality. It was  
39 present in three of the models predicting mortality in children <sup>26 28 30</sup> and five models predicting mortality  
40 in adults <sup>15 16 24 27 35</sup>. Acidosis usually results from underlying pathologies like respiratory distress, renal  
41 failure and shock. These three variables were also common variables in the models predicting mortality  
42 in both children and adults identified in this review. Renal failure expressed in these models either as  
43 acute renal failure, oligoanuria or estimates of the kidney function using serum urea and creatinine <sup>15 17</sup>  
44 <sup>22-24 28 30 35</sup>; is due to acute tubular necrosis that occurs in severe malaria infection as a direct result of  
45 microvascular obstruction of capillaries by infected red blood cells leading to the release of  
46 inflammatory cytokines like tumor necrosis factor <sup>51</sup>. Similarly, shock expressed either as a function of  
47 the systolic blood pressure or cold peripheries in three models in children <sup>19 29 30</sup> and likewise in two  
48 models in adults <sup>17 35</sup> could result from peripheral vasodilation which may usually occur concomitantly  
49 with sepsis and is a marker of a poor prognosis <sup>7 52 53</sup>.  
50  
51  
52  
53  
54  
55  
56  
57

58 We found evidence of external validation in only seven of the models identified in this study <sup>16 18 22 29</sup>  
59 <sup>30</sup>. External validation is an important component as it determines the generalisability of the model and  
60



1  
2  
3 its potential use in different geographical regions<sup>54</sup>. As outlined above, most of the models have similar  
4 variables highlighting the fact that the predictors of complications, severity and mortality in malaria  
5 might be consistent across different settings. Emphasis could therefore be better placed in the validation  
6 of existing models and initiating their use in clinical settings to guide clinicians on prioritising patients  
7 and anticipating outcomes rather than the production of new models. Publication of the findings on the  
8 use of these models in clinical settings should also be encouraged to guide clinicians on which models  
9 work better in various settings.  
10  
11  
12  
13

### 14 **Conclusion:**

15  
16  
17 Models predicting severity and mortality of malaria infection identified in this review have similar  
18 predictors. Evidence is however lacking on the generalisability of most of these models due lack of  
19 external validation. Emphasis should therefore be placed on external validation of existing models and  
20 publication of the findings of their use in clinical settings to guide clinicians on management options  
21 depending on the priorities of their patients.  
22  
23  
24

### 25 **Abbreviations:**

26  
27  
28 ICU: intensive care units; PRISMA: Preferred Reporting Items for Systematic Reviews and Meta-  
29 Analysis; AUC: area under the curve; SEQUAMAT: South East Asian Quinine Artesunate Malaria  
30 Trial; RCT: randomised control trial; TNF: tumour necrosis factor; AUROC: area under the receiver  
31 operating curve; LODS: Lambarene Organ Dysfunction Score; SICK: Signs of Inflammation in  
32 Children that Kill; PEDIA: Pediatric Early Death Index for Africa; PRISM: Pediatric Risk of  
33 Mortality; APACHE: acute physiology and chronic health evaluation system; MSA: Malaria score for  
34 adults; MPS: Malaria prediction score; CAM: coma acidosis malaria; MSS: Malaria severity score;  
35 GCRBS: Glasgow coma scale, creatinine, respiratory rate, bilirubin and systolic BP; MODS: Multi-  
36 organ dysfunction score; sMODS: Simplified MODS  
37  
38  
39  
40  
41  
42

### 43 **Declarations**

44  
45 ***Ethics approval and consent to participate:*** Not applicable  
46  
47

48 ***Consent for publication:*** Not applicable  
49

50 ***Availability of data and material:*** Not applicable  
51

52 ***Competing interests:*** The authors declare no competing interests  
53

54 ***Funding:*** No external funding was used in carrying out this review.  
55

56  
57 ***Authors' contributions:*** Conception: TN; independent reviews of papers: TN & BST; writing of  
58 initial draft: TN; manuscript revisions: TN & BST.  
59  
60

1  
2  
3 *Acknowledgements:* None.  
4  
5  
6  
7  
8  
9  
10  
11  
12  
13  
14  
15  
16  
17  
18  
19  
20  
21  
22  
23  
24  
25  
26  
27  
28  
29  
30  
31  
32  
33  
34  
35  
36  
37  
38  
39  
40  
41  
42  
43  
44  
45  
46  
47  
48  
49  
50  
51  
52  
53  
54  
55  
56  
57  
58  
59  
60

For peer review only



Table 1: Summary of articles with models predicting complications in severe malaria

| N                               | Authors                | Year | Period of participant recruitment | Country                                  | Type of study            | Sample size | Statistics used                 | Name of model | Method internal validation | Age profiles                                | Sex profiles    | Outcome predicted                                                              | Variables used                                                                                                               | Diagnostic properties                                | External validation | Use in clinical settings |
|---------------------------------|------------------------|------|-----------------------------------|------------------------------------------|--------------------------|-------------|---------------------------------|---------------|----------------------------|---------------------------------------------|-----------------|--------------------------------------------------------------------------------|------------------------------------------------------------------------------------------------------------------------------|------------------------------------------------------|---------------------|--------------------------|
| <b>Complications of malaria</b> |                        |      |                                   |                                          |                          |             |                                 |               |                            |                                             |                 |                                                                                |                                                                                                                              |                                                      |                     |                          |
| <b>Severe anaemia</b>           |                        |      |                                   |                                          |                          |             |                                 |               |                            |                                             |                 |                                                                                |                                                                                                                              |                                                      |                     |                          |
| 1                               | Weber <sup>13</sup>    | 1997 | July – December 1994              | Gambia                                   | Cohort                   | 368         | Logistic regression             | None          | None                       | Median age: 28 months (IQR: 14 – 48 months) | Females – 49%   | Paediatric development of severe anaemia in malaria (packed cell volume < 15%) | Pallor of conjunctiva and pallor of palms                                                                                    | Sensitivity of 80% and a specificity of 85%.         | None                | NE                       |
| 2                               | Brickley <sup>12</sup> | 2017 | 2002 - 2006                       | Tanzania                                 | Cohort                   | 880         | Cox proportional hazards models | None          | Bootsrapping               | 0 – 4 years                                 | Females – 48.1% | Paediatric development of severe anaemia (Hb <50g/L) in falciparum malaria     | Sex, gravidity, transmission season at delivery, and bed net possession                                                      | C-index – 0.63 (95% CI 0.54 – 0.71)                  | None                | NE                       |
| <b>Development of sepsis</b>    |                        |      |                                   |                                          |                          |             |                                 |               |                            |                                             |                 |                                                                                |                                                                                                                              |                                                      |                     |                          |
| 3                               | Njim <sup>7</sup>      | 2018 | June 2003 – May 2005              | Bangladesh, India, Indonesia and Myanmar | Randomised Control Trial | 1187        | Logistic regression             | None          | Bootsrapping               | 17 – 87 years                               | Females – 24.3% | Development of clinical sepsis in adults with severe falciparum malaria        | Sex, blood urea nitrogen levels, plasma anion gap, respiratory distress, shock on admission, parasitaemia, coma and jaundice | AUC: 0.789. Sensitivity – 70.0%; specificity – 69.4% | None                | NE                       |

\* not used in present model; BCS: Blantyre coma score; NC: not clear; NE: No evidence; <sup>a</sup> diagnostic properties of original model; IQR: interquartile range; RCT: randomised control trial; ACT: artemisinin combined therapy; DRC: Democratic Republic of the Congo; BUN: blood urea nitrogen; TNF: tissue necrotic factor

**Table 2: Summary of articles with models predicting mortality in paediatric severe malaria**

| N                | Authors                | Year | Period of participant recruitment | Country | Type of study                                                  | Sample size | Statistics used      | Name of model            | Method internal of validation        | Age profiles         | Sex profiles    | Outcome predicted                           | Variables used                                                                                                   | Diagnostic properties                                                           | External validation | Use in clinical settings |
|------------------|------------------------|------|-----------------------------------|---------|----------------------------------------------------------------|-------------|----------------------|--------------------------|--------------------------------------|----------------------|-----------------|---------------------------------------------|------------------------------------------------------------------------------------------------------------------|---------------------------------------------------------------------------------|---------------------|--------------------------|
| <b>Mortality</b> |                        |      |                                   |         |                                                                |             |                      |                          |                                      |                      |                 |                                             |                                                                                                                  |                                                                                 |                     |                          |
| 1                | Jaffar <sup>19</sup>   | 1997 | 1992 – 1994                       | Gambia  | Retrospective analysis of data from a randomised control trial | 624         | Logistic regression  | None                     | None                                 | 1 – 9.5 years        | Females – 49%   | Mortality in paediatric cerebral malaria    | Cold periphery, deep coma and hypoglycaemia                                                                      | Not done                                                                        | None                | NE                       |
| 2                | Molyneux <sup>25</sup> | 1989 | January 1987 – June 1988          | Malawi  | Cohort                                                         | 131         | Univariable analysis | Bedside prognostic index | None                                 | 7 months – 10 years  | Females – 55.7% | Mortality in paediatric cerebral malaria    | Blood glucose, parasitaemia, WBC count, age, coma score, absent corneal reflexes, decerebration, convulsions     | Positive predictive value – 83%, sensitivity – 66%                              | None                | NE                       |
| 3                | Conroy <sup>14</sup>   | 2012 | 1997 – 2009                       | Malawi  | Cohort                                                         | 155         | Logistic regression  | None                     | Hosmer-Lemeshow goodness-of-fit test | 8 months – 14 years  | Females – 54.4% | Mortality in patients with cerebral malaria | Age, Blantyre coma score, respiratory distress, severe anaemia, angiopoietin-1, angiopoietin-2 and sTie-2 levels | C-index of 0.79 (95% CI 0.72 – 0.84)                                            | None                | NE                       |
| 4                | Krishna <sup>20</sup>  | 1994 | 1988 – 1989                       | Gambia  | Cohort study                                                   | 115         | Logistic regression  | None                     | Wald statistic and ROC analysis      | 18 months – 12 years | NC              | Mortality in paediatric severe malaria      | Coma score, whole blood lactate/glucose ratio, TNF level                                                         | Wald statistic: coma score (4.5), lactate/glucose ratio (8.36), TNF level (6.5) | None                | NE                       |

|   |                        |      |                                  |                                         |        |       |                     |                                                             |                                                 |                                     |                     |                                                      |                                                                                                                                                                                                                                                                   |                                                                                                       |      |    |
|---|------------------------|------|----------------------------------|-----------------------------------------|--------|-------|---------------------|-------------------------------------------------------------|-------------------------------------------------|-------------------------------------|---------------------|------------------------------------------------------|-------------------------------------------------------------------------------------------------------------------------------------------------------------------------------------------------------------------------------------------------------------------|-------------------------------------------------------------------------------------------------------|------|----|
| 5 | Marsh <sup>21</sup>    | 1995 | May 1989 – November 1991         | Kenya                                   | Cohort | 1844  | Logistic regression | None                                                        | None                                            | Mean: 26 months                     | NC                  | Mortality in children with severe malaria            | Impaired consciousness, respiratory distress, hypoglycemia, and jaundice                                                                                                                                                                                          | Predicted 92.2% of deaths                                                                             | None | NE |
| 6 | Newton <sup>26</sup>   | 2005 | January 2001 – December 2003     | Malawi, Kenya and Ghana                 | Cohort | 14605 | Linear regression   | None                                                        | AUROC                                           | Mean age: 32 – 36 months            | Females – 53 – 55%  | Mortality in paediatric severe falciparum malaria    | Deep breathing, Blantyre Coma Score, inability to sit, weight-for-age Z score, hypoglycaemia, base excess and lactate concentration                                                                                                                               | C-statistic 0.83 – 0.88 in the three sites: Blantyre (0.88), Kilifi (0.87) and Kumasi (0.83)          | None | NE |
| 7 | Gérardin <sup>30</sup> | 2006 | October 1, 1997 – March 31, 1999 | Senegal                                 | Cohort | 311   | Logistic regression | PRISM (Pediatric Risk of Mortality) AUC: 0.92 <sup>38</sup> | Hosmer-Lemeshow chi-square test                 | Median: 8 years (IQR: 5 – 11 years) | Females – 40.5%     | Mortality in children with falciparum malaria        | Systolic blood pressure, temperature, mental status, heart rate, dilatation of pupils, pH, total CO <sub>2</sub> , PCO <sub>2</sub> , arterial PaO <sub>2</sub> , serum glucose, potassium, urea, creatinine, white blood cells, prothrombin time, platelet count | AUROC for acute malaria: 0.89 (95% CI: 0.85 – 0.92) and 0.86 (95% CI: 0.81 – 0.90) for severe malaria | Yes  | NE |
| 8 | Helbok <sup>18</sup>   | 2009 | December 2000 – May 2005         | Gambia, Malawi, Kenya, Ghana, and Gabon | Cohort | 23890 | Logistic regression | LODS (Lambaréné Organ Dysfunction Score)                    | Internal validation using Bonferroni correction | Mean: 30 – 38 months                | Females – 41% – 47% | Mortality in children with severe falciparum malaria | Coma, prostration and deep breathing                                                                                                                                                                                                                              | AUROC: 80 0.80 (0.79 – 0.82)                                                                          | Yes  | NE |

|                                                                     |                            |      |             |                                                                          |                        |      |                     |                                                                                                                                   |                                 |                              |                      |                                                                                  |                                                                                                                          |                                   |      |    |
|---------------------------------------------------------------------|----------------------------|------|-------------|--------------------------------------------------------------------------|------------------------|------|---------------------|-----------------------------------------------------------------------------------------------------------------------------------|---------------------------------|------------------------------|----------------------|----------------------------------------------------------------------------------|--------------------------------------------------------------------------------------------------------------------------|-----------------------------------|------|----|
| 9                                                                   | von Seidlein <sup>28</sup> | 2012 | 2005 - 2010 | Gambia, Mozambique, Nigeria, Rwanda, Kenya, DRC, Tanzania, Ghana, Uganda | Retrospective analysis | 5426 | Logistic regression | None                                                                                                                              | ROC analysis                    | Median: 2.8 years (1.7, 4.3) | NC                   | Mortality in paediatric severe falciparum malaria                                | Base deficit, coma, convulsions, BUN and chronic illness                                                                 | AUROC: 0.85 (95% CI: 0.83 - 0.87) | None | NE |
| 10                                                                  | Conroy <sup>29</sup>       | 2015 | NC          | Uganda                                                                   | Cohort                 | 1589 | Logistic regression | SICK (Signs of Inflammation in Children that Kill) <sup>36</sup> – AUC <sup>a</sup> : 0.887 (sensitivity 84.1% specificity 82.2%) | Hosmer-Lemeshow goodness of fit | NC                           | Females – 54.3%      | Mortality in malaria                                                             | Altered consciousness, temperature, heart rate, respiratory rate, systolic blood pressure, capillary refill time and age | AUROC – 0.846                     | Yes  | NE |
| LODS <sup>55</sup>                                                  |                            |      |             |                                                                          |                        |      |                     | Hosmer-Lemeshow goodness of fit                                                                                                   | NC                              | Females – 54.3%              | Mortality in malaria | Prostration, coma (BCS) and deep breathing                                       | AUROC – 0.898                                                                                                            | Yes                               | NE   |    |
| PEDIA <sup>37</sup> – AUC <sup>a</sup> : 0.93 (95% CI 0.92 to 0.94) |                            |      |             |                                                                          |                        |      |                     | Hosmer-Lemeshow goodness of fit                                                                                                   | NC                              | Females – 54.3%              | Mortality in malaria | Kwashiorkor*, jaundice, subcostal indrawing, prostration (±seizures) and wasting | AUROC – 0.896                                                                                                            | Yes                               | NE   |    |

\* not used in present model; BCS: Blantyre coma score; NC: not clear; NE: No evidence; <sup>a</sup> diagnostic properties of original model; IQR: interquartile range; RCT: randomised control trial; ACT: artemisinin combined therapy; DRC: Democratic Republic of the Congo; BUN: blood urea nitrogen; TNF: tissue necrotic factor

**Table 3: Summary of articles with models predicting mortality in adult severe malaria**

| N                | Authors                   | Year | Period of participant recruitment | Country  | Type of study | Sample size | Statistics used     | Name of model                  | Method internal of validation        | Age profiles   | Sex profiles    | Outcome predicted                                            | Variables used                                                                                                                                               | Diagnostic properties                                                                           | External validation | Use in clinical settings |
|------------------|---------------------------|------|-----------------------------------|----------|---------------|-------------|---------------------|--------------------------------|--------------------------------------|----------------|-----------------|--------------------------------------------------------------|--------------------------------------------------------------------------------------------------------------------------------------------------------------|-------------------------------------------------------------------------------------------------|---------------------|--------------------------|
| <b>Mortality</b> |                           |      |                                   |          |               |             |                     |                                |                                      |                |                 |                                                              |                                                                                                                                                              |                                                                                                 |                     |                          |
| 1                | Wilairatana <sup>35</sup> | 1995 | July 1991 – May 1993              | Thailand | Cohort        | 72          | Univariate analysis | APACHE II score <sup>56</sup>  | ROC analysis                         | Mean age: 29.9 | Females – 33.3% | Mortality in adult patients with cerebral falciparum malaria | MAP, temperature, heart rate, respiratory rate, arterial pH, PaO <sub>2</sub> , haematocrit, WBC count, creatinine, sodium, potassium and Glasgow coma score | Predicted mortality with 95.8% accuracy                                                         | None                | NE                       |
| 2                | Dondorp <sup>15</sup>     | 2004 | NC                                | Vietnam  | Cohort        | 268         | Logistic regression | None                           | Hosmer-Lemeshow goodness-of-fit test | 15 – 79 years  | Females – 19%   | Mortality in adults with severe falciparum malaria           | Plasma lactate, plasma strong anion gap and plasma creatinine                                                                                                | AUROC: 0.81                                                                                     | None                | NE                       |
| 3                | Mishra <sup>22</sup>      | 2007 | NC                                | India    | Cohort        | 212         | Linear regression   | MSA (Malaria score for adults) | Not done                             | NC             | NC              | Mortality in adults with severe malaria                      | severe anaemia, acute renal failure, respiratory distress, cerebral malaria                                                                                  | Sensitivity : 89.9%, specificity : 70.6%, positive predictive value: 94.1% with cut-off of 5/10 | Yes <sup>39</sup>   | NE                       |
|                  |                           |      |                                   |          |               |             |                     | MPS (Malaria prediction score) | Not done                             | NC             | NC              | Mortality in severe malaria                                  | Age, serum creatinine level, haemoglobin level, cerebral malaria, presence of a pregnancy, use of a ventilator                                               | NE                                                                                              | Yes <sup>39</sup>   | NE                       |

|   |                         |      |                             |                                                   |                                                      |      |                     |                                                                            |                                                                                       |                         |                |                                                                            |                                                                                                               |                                                                                            |                   |    |
|---|-------------------------|------|-----------------------------|---------------------------------------------------|------------------------------------------------------|------|---------------------|----------------------------------------------------------------------------|---------------------------------------------------------------------------------------|-------------------------|----------------|----------------------------------------------------------------------------|---------------------------------------------------------------------------------------------------------------|--------------------------------------------------------------------------------------------|-------------------|----|
| 4 | Hanson <sup>16</sup>    | 2010 | June 2003 – May 2005        | Bangladesh, India, Indonesia and Myanmar          | Retrospective analysis of a randomised control trial | 789  | Logistic regression | CAM (coma acidosis malaria) score                                          | Hosmer-Lemeshow goodness-of-fit                                                       | NC                      | NC             | Mortality in adults with severe malaria                                    | Coma and acidosis (base deficit)                                                                              | AUROC: 0.81 (95% CI: 0.77 – 0.84)                                                          | Yes <sup>57</sup> | NE |
| 5 | Mohapatra <sup>24</sup> | 2009 | January 200 – December 2004 | India                                             | Cohort study                                         | 2089 | Logistic regression | MSS (Malaria severity score)                                               | Hosmer-Lemeshow goodness-of-fit (internal validation by splitting data – 2089 vs 509) | 18 – 71 years           | Female – 34.6% | Mortality in adult patients with severe falciparum malaria                 | neurologic, renal, haematologic, hepatic, respiratory, cardiovascular, and metabolic organ systems            | AUROC: 0.9                                                                                 | None              | NE |
| 6 | Newton <sup>27</sup>    | 2013 | 1986 – 2002                 | Thailand                                          | Retrospective analysis                               | 988  | Logistic regression | MPI (Malaria prognostic index)                                             | ROC curve analysis and internal validation by data splitting                          | 15 – 74 years           | Females – 43%  | Mortality in adult severe falciparum malaria                               | Glasgow coma scale, parasitaemia, plasma lactate, serum bilirubin, pigmented parasites and treatment with ACT | AUROC: 0.97                                                                                | None              | NE |
| 7 | Mohapatra <sup>23</sup> | 2014 | NC                          | India                                             | Cohort                                               | 112  | NC                  | GCBRS (GCS, creatinine, respiratory rate, bilirubin and systolic BP) score | NC                                                                                    | Mean: 35.8 ± 15.1 years | Females – 16.1 | Mortality in severe falciparum malaria                                     | Cerebral malaria, renal failure, respiratory distress, jaundice and shock                                     | Sensitivity : 85.3%. Specificity : 95.6%                                                   | None              | NE |
| 8 | Hanson <sup>17</sup>    | 2014 | 1996 – 2013                 | Bangladesh, India, Indonesia, Vietnam and Myanmar | Randomised control trials and cohort studies         | 1801 | Logistic regression | None                                                                       | Hosmer-Lemeshow goodness-of-fit                                                       | 21 – 45                 | Females – 24.4 | 48-hour survival and survival to discharge in patients with severe malaria | Shock, oligo-anuria, dysglycaemia, respiratory rate, Glasgow Coma Score and absence of fever                  | PPV for 48 hour-survival: 99.4% (95% CI 97.8 – 99.9). PPV for survival to discharge: 96.9% | None              | NE |

|  |  |  |  |  |  |  |  |  |  |  |  |  |  |  |  |  |                             |  |  |
|--|--|--|--|--|--|--|--|--|--|--|--|--|--|--|--|--|-----------------------------|--|--|
|  |  |  |  |  |  |  |  |  |  |  |  |  |  |  |  |  | (95% CI:<br>94.3 –<br>98.5) |  |  |
|--|--|--|--|--|--|--|--|--|--|--|--|--|--|--|--|--|-----------------------------|--|--|

\* not used in present model; BCS: Blantyre coma score; NC: not clear; NE: No evidence; <sup>a</sup> diagnostic properties of original model; IQR: interquartile range; RCT: randomised control trial; ACT: artemisinin combined therapy; DRC: Democratic Republic of the Congo; BUN: blood urea nitrogen; TNF: tissue necrotic factor

**Table 4: Summary of articles with models predicting severity of malaria infection**

| N                          | Authors              | Year | Period of participant recruitment  | Country  | Type of study | Sample size | Statistics used   | Name of model                                      | Method internal of validation | Age profiles            | Sex profiles   | Outcome predicted                                                           | Variables used                                                                                                                                                                       | Diagnostic properties | External validation | Use in clinical settings |
|----------------------------|----------------------|------|------------------------------------|----------|---------------|-------------|-------------------|----------------------------------------------------|-------------------------------|-------------------------|----------------|-----------------------------------------------------------------------------|--------------------------------------------------------------------------------------------------------------------------------------------------------------------------------------|-----------------------|---------------------|--------------------------|
| <b>Severity of disease</b> |                      |      |                                    |          |               |             |                   |                                                    |                               |                         |                |                                                                             |                                                                                                                                                                                      |                       |                     |                          |
| 1                          | Helbok <sup>33</sup> | 2003 | October 1, 2001 – January 30, 2002 | Thailand | Cohort        | 22          | NC                | MODS (Multi-organ dysfunction score) <sup>40</sup> | None                          | 16 – 41 years           | Female – 41.8% | Severity of disease in adult patients with uncomplicated falciparum malaria | Ten organ systems: (heart, blood vessel, blood, respiratory system, metabolism, gastrointestinal system, liver, kidney and urinary tract, immune system, and central nervous system) | None                  | None                | NE                       |
| 2                          | Helbok <sup>32</sup> | 2005 | October 1, 2001 – July 30, 2002    | Thailand | Cohort        | 29          | Survival analysis | MODS <sup>40</sup>                                 | None                          | Mean age: 27.1 (± 10.6) | Female – 27.6% | Severity of disease in adult patients with severe falciparum malaria        | Ten organ systems: (heart, blood vessel, blood, respiratory system, metabolism, gastrointestinal system, liver, kidney and urinary                                                   | None                  | None                | NE                       |

|   |                      |      |                        |       |        |     |                   |                               |              |                       |               |                                                                                         |                                                                                                                                                                                      |                                                                                        |      |    |
|---|----------------------|------|------------------------|-------|--------|-----|-------------------|-------------------------------|--------------|-----------------------|---------------|-----------------------------------------------------------------------------------------|--------------------------------------------------------------------------------------------------------------------------------------------------------------------------------------|----------------------------------------------------------------------------------------|------|----|
|   |                      |      |                        |       |        |     |                   |                               |              |                       |               |                                                                                         | tract, immune system, and central nervous system)                                                                                                                                    |                                                                                        |      |    |
| 3 | Helbok <sup>34</sup> | 2006 | August 2003 – May 2005 | Gabon | Cohort | 485 | Survival analysis | Simplified MODS <sup>33</sup> | ROC analysis | 4 months – 169 months | Females – 49% | Severity of disease and disability in children with severe falciparum malaria infection | Ten organ systems: (heart, blood vessel, blood, respiratory system, metabolism, gastrointestinal system, liver, kidney and urinary tract, immune system, and central nervous system) | AUC to predict prolonged disease (>48 hours unable to walk): 0.92 (95% CI, 0.89–0.95). | None | NE |

\* not used in present model; BCS: Blantyre coma score; NC: not clear; NE: No evidence; <sup>a</sup> diagnostic properties of original model; IQR: interquartile range; RCT: randomised control trial; ACT: artemisinin combined therapy; DRC: Democratic Republic of the Congo; BUN: blood urea nitrogen; TNF: tissue necrotic factor



## References

1. White NJ, Pukrittayakamee S, Hien TT, et al. Malaria. *Lancet* 2014;383(9918):723-35. doi: 10.1016/S0140-6736(13)60024-0 [published Online First: 2013/08/21]
2. Tanner M, Greenwood B, Whitty CJ, et al. Malaria eradication and elimination: views on how to translate a vision into reality. *BMC Med* 2015;13:167. doi: 10.1186/s12916-015-0384-6 [published Online First: 2015/07/26]
3. World Health Organisation. Achieving the malaria MDG target: reversing the incidence of malaria 2000-2015. Geneva, 2015.
4. World Health Organisation. World Malaria Report. Geneva: World Health Organisation, 2016.
5. A single agenda needed for malaria. *Lancet Infect Dis* 2003;3(6):317. [published Online First: 2003/06/05]
6. Day N, Dondorp AM. The management of patients with severe malaria. *Am J Trop Med Hyg* 2007;77(6 Suppl):29-35. [published Online First: 2008/01/31]
7. Njim T, Dondorp A, Mukaka M, et al. Identifying risk factors for the development of sepsis during adult severe malaria. *Malaria Journal* 2018;17(1):278-78. doi: 10.1186/s12936-018-2430-2
8. Perel P, Edwards P, Wentz R, et al. Systematic review of prognostic models in traumatic brain injury. *BMC Med Inform Decis Mak* 2006;6:38. doi: 10.1186/1472-6947-6-38
9. Vogenberg FR. Predictive and prognostic models: implications for healthcare decision-making in a modern recession. *Am Health Drug Benefits* 2009;2(6):218-22.
10. Cook NR. Statistical evaluation of prognostic versus diagnostic models: beyond the ROC curve. *Clin Chem* 2008;54(1):17-23. doi: 10.1373/clinchem.2007.096529
11. Mehdi T, Bashardoost N, Ahmadi M. Kernel Smoothing For ROC Curve And Estimation For Thyroid Stimulating Hormone. *International Journal of Public Health Research* 2011(Special issue 2011):239-42.
12. Brickley EB, Kabyemela E, Kurtis JD, et al. Developing a novel risk prediction model for severe malarial anemia. *Global Health, Epidemiology And Genomics* 2017;2:e14-e14. doi: 10.1017/ghg.2017.8
13. Weber MW, Kellingray SD, Palmer A, et al. Pallor as a clinical sign of severe anaemia in children: an investigation in the Gambia. *Bulletin Of The World Health Organization* 1997;75 Suppl 1:113-18.
14. Conroy AL, Glover SJ, Hawkes M, et al. Angiopoietin-2 levels are associated with retinopathy and predict mortality in Malawian children with cerebral malaria: a retrospective case-control study\*. *Critical Care Medicine* 2012;40(3):952-59. doi: 10.1097/CCM.0b013e3182373157
15. Dondorp AM, Chau TTH, Phu NH, et al. Unidentified acids of strong prognostic significance in severe malaria. *Critical Care Medicine* 2004;32(8):1683-88.
16. Hanson J, Lee SJ, Mohanty S, et al. A simple score to predict the outcome of severe malaria in adults. *Clin Infect Dis* 2010;50(5):679-85. doi: 10.1086/649928 [published Online First: 2010/01/29]
17. Hanson J, Lee SJ, Mohanty S, et al. Rapid clinical assessment to facilitate the triage of adults with falciparum malaria, a retrospective analysis. *PLoS One* 2014;9(1):e87020. doi: 10.1371/journal.pone.0087020 [published Online First: 2014/02/04]

18. Helbok R, Kendjo E, Issifou S, et al. The Lambarene Organ Dysfunction Score (LODS) is a simple clinical predictor of fatal malaria in African children. *J Infect Dis* 2009;200(12):1834-41. doi: 10.1086/648409 [published Online First: 2009/11/17]
19. Jaffar S, Van Hensbroek MB, Palmer A, et al. Predictors of a fatal outcome following childhood cerebral malaria. *Am J Trop Med Hyg* 1997;57(1):20-4. [published Online First: 1997/07/01]
20. Krishna S, Waller DW, ter Kuile F, et al. Lactic acidosis and hypoglycaemia in children with severe malaria: pathophysiological and prognostic significance. *Trans R Soc Trop Med Hyg* 1994;88(1):67-73. [published Online First: 1994/01/01]
21. Marsh K, Forster D, Waruiru C, et al. Indicators of life-threatening malaria in African children. *N Engl J Med* 1995;332(21):1399-404. doi: 10.1056/NEJM199505253322102 [published Online First: 1995/05/25]
22. Mishra SK, Panigrahi P, Mishra R, et al. Prediction of outcome in adults with severe falciparum malaria: a new scoring system. *Malaria Journal* 2007;6:24-24.
23. Mohapatra BN, Jangid SK, Mohanty R. GCRBS score: a new scoring system for predicting outcome in severe falciparum malaria. *Journal Of The Association Of Physicians Of India* 2014;62
24. Mohapatra MK, Das SP. The malaria severity score: a method for severity assessment and risk prediction of hospital mortality for falciparum malaria in adults. *The Journal Of The Association Of Physicians Of India* 2009;57:119-26.
25. Molyneux ME, Taylor TE, Wirima JJ, et al. Clinical features and prognostic indicators in paediatric cerebral malaria: a study of 131 comatose Malawian children. *Q J Med* 1989;71(265):441-59. [published Online First: 1989/05/01]
26. Newton CRJC, Valim C, Krishna S, et al. The prognostic value of measures of acid/base balance in pediatric falciparum malaria, compared with other clinical and laboratory parameters. *Clinical Infectious Diseases: An Official Publication Of The Infectious Diseases Society Of America* 2005;41(7):948-57.
27. Newton PN, Stepniewska K, Dondorp A, et al. Prognostic indicators in adults hospitalized with falciparum malaria in Western Thailand. *Malar J* 2013;12:229. doi: 10.1186/1475-2875-12-229 [published Online First: 2013/07/09]
28. von Seidlein L, Olaosebikan R, Hendriksen IC, et al. Predicting the clinical outcome of severe falciparum malaria in african children: findings from a large randomized trial. *Clin Infect Dis* 2012;54(8):1080-90. doi: 10.1093/cid/cis034 [published Online First: 2012/03/14]
29. Conroy AL, Hawkes M, Hayford K, et al. Prospective validation of pediatric disease severity scores to predict mortality in Ugandan children presenting with malaria and non-malaria febrile illness. *Critical Care (London, England)* 2015;19:47-47. doi: 10.1186/s13054-015-0773-4
30. Gérardin P, Rogier C, Leteurtre S, et al. Evaluation of Pediatric Risk of Mortality (PRISM) scoring in African children with falciparum malaria. *Pediatric Critical Care Medicine: A Journal Of The Society Of Critical Care Medicine And The World Federation Of Pediatric Intensive And Critical Care Societies* 2006;7(1):45-47.
31. Khoo KL, Tan WL, Eng P, et al. Malaria requiring intensive care. *Annals Of The Academy Of Medicine, Singapore* 1998;27(3):353-57.
32. Helbok R, Dent W, Nacher M, et al. The use of the multi-organ-dysfunction score to discriminate different levels of severity in severe and complicated Plasmodium falciparum malaria. *Am J Trop Med Hyg* 2005;72(2):150-4. [published Online First: 2005/03/03]

- 1  
2  
3 33. Helbok R, Dent W, Nacher M, et al. Use of the multi-organ dysfunction score as a tool to  
4 discriminate different levels of severity in uncomplicated Plasmodium falciparum malaria.  
5 *Am J Trop Med Hyg* 2003;68(3):372-5. [published Online First: 2003/04/11]  
6  
7 34. Helbok R, Issifou S, Matsiegui PB, et al. Simplified multi-organ dysfunction score predicts  
8 disability in African children with Plasmodium falciparum malaria. *Am J Trop Med Hyg*  
9 2006;75(3):443-7. [published Online First: 2006/09/14]  
10  
11 35. Wilairatana P, Looareesuwan S. APACHE II scoring for predicting outcome in cerebral malaria.  
12 *The Journal Of Tropical Medicine And Hygiene* 1995;98(4):256-60.  
13  
14 36. Kumar N, Thomas N, Singhal D, et al. Triage score for severity of illness. *Indian Pediatr*  
15 2003;40(3):204-10. [published Online First: 2003/03/27]  
16  
17 37. Berkley JA, Ross A, Mwangi I, et al. Prognostic indicators of early and late death in children  
18 admitted to district hospital in Kenya: cohort study. *BMJ* 2003;326(7385):361. [published  
19 Online First: 2003/02/15]  
20  
21 38. Pollack MM, Ruttimann UE, Getson PR. Pediatric risk of mortality (PRISM) score. *Crit Care*  
22 *Med* 1988;16(11):1110-6. [published Online First: 1988/11/01]  
23  
24 39. Santos LC, Abreu CF, Xerinda SM, et al. Severe imported malaria in an intensive care unit: a  
25 review of 59 cases. *Malaria Journal* 2012;11:96-96. doi: 10.1186/1475-2875-11-96  
26  
27 40. Weiler T, Baldering HJ, Heinrichs W, et al. [Quality assurance in intensive care medicine. Results  
28 of a multicenter study in Germany]. *Anesthesiol Intensivmed Notfallmed Schmerzther*  
29 1997;32(6):372-5. doi: 10.1055/s-2007-995073 [published Online First: 1997/06/01]  
30  
31 41. Thwaites GE, Chau TT, Stepniewska K, et al. Diagnosis of adult tuberculous meningitis by use of  
32 clinical and laboratory features. *Lancet* 2002;360(9342):1287-92. [published Online First:  
33 2002/11/05]  
34  
35 42. Weisfelt M, van de Beek D, Spanjaard L, et al. A risk score for unfavorable outcome in adults  
36 with bacterial meningitis. *Ann Neurol* 2008;63(1):90-7. doi: 10.1002/ana.21216 [published  
37 Online First: 2007/09/08]  
38  
39 43. Wall EC, Mukaka M, Scarborough M, et al. Prediction of Outcome From Adult Bacterial  
40 Meningitis in a High-HIV-Seroprevalence, Resource-Poor Setting Using the Malawi Adult  
41 Meningitis Score (MAMS). *Clin Infect Dis* 2017;64(4):413-19. doi: 10.1093/cid/ciw779  
42 [published Online First: 2016/12/09]  
43  
44 44. Plewes K, Turner GDH, Dondorp AM. Pathophysiology, clinical presentation, and treatment of  
45 coma and acute kidney injury complicating falciparum malaria. *Curr Opin Infect Dis*  
46 2018;31(1):69-77. doi: 10.1097/QCO.0000000000000419 [published Online First:  
47 2017/12/06]  
48  
49 45. White VA, Lewallen S, Beare N, et al. Correlation of retinal haemorrhages with brain  
50 haemorrhages in children dying of cerebral malaria in Malawi. *Transactions Of The Royal*  
51 *Society Of Tropical Medicine And Hygiene* 2001;95(6):618-21.  
52  
53 46. Lewallen S, Bronzan RN, Beare NA, et al. Using malarial retinopathy to improve the  
54 classification of children with cerebral malaria. *Transactions Of The Royal Society Of*  
55 *Tropical Medicine And Hygiene* 2008;102(11):1089-94. doi: 10.1016/j.trstmh.2008.06.014  
56  
57 47. Ogetii GN, Akech S, Jemutai J, et al. Hypoglycaemia in severe malaria, clinical associations and  
58 relationship to quinine dosage. *BMC Infect Dis* 2010;10:334. doi: 10.1186/1471-2334-10-334  
59 [published Online First: 2010/11/26]  
60

- 1  
2  
3 48. Thien HV, Kager PA, Sauerwein HP. Hypoglycemia in falciparum malaria: is fasting an  
4 unrecognized and insufficiently emphasized risk factor? *Trends Parasitol* 2006;22(9):410-5.  
5 doi: 10.1016/j.pt.2006.06.014 [published Online First: 2006/07/15]  
6  
7 49. Taylor WRJ, Hanson J, Turner GDH, et al. Respiratory manifestations of malaria. *Chest*  
8 2012;142(2):492-505. doi: 10.1378/chest.11-2655 [published Online First: 2012/08/09]  
9  
10 50. Maca J, Jor O, Holub M, et al. Past and Present ARDS Mortality Rates: A Systematic Review.  
11 *Respir Care* 2017;62(1):113-22. doi: 10.4187/respcare.04716 [published Online First:  
12 2016/11/03]  
13  
14 51. Duvic C, Rabar D, Didelot F, et al. [Acute renal failure during severe malaria: physiopathology  
15 and therapeutic management. Apropos of 2 cases]. *Med Trop (Mars)* 2000;60(3):267-70.  
16 [published Online First: 2001/03/22]  
17  
18 52. Bruneel F, Gachot B, Timsit JF, et al. Shock complicating severe falciparum malaria in European  
19 adults. *Intensive Care Med* 1997;23(6):698-701. [published Online First: 1997/06/01]  
20  
21 53. Kuethe F, Pfeifer R, Rummler S, et al. Treatment of a patient with shock complicating severe  
22 falciparum malaria: a case report. *Cases J* 2009;2:6644. doi: 10.1186/1757-1626-0002-  
23 0000006644 [published Online First: 2010/02/26]  
24  
25 54. Altman DG, Vergouwe Y, Royston P, et al. Prognosis and prognostic research: validating a  
26 prognostic model. *BMJ* 2009;338:b605. doi: 10.1136/bmj.b605 [published Online First:  
27 2009/05/30]  
28  
29 55. Taylor T, Olola C, Valim C, et al. Standardized data collection for multi-center clinical studies of  
30 severe malaria in African children: establishing the SMAC network. *Trans R Soc Trop Med*  
31 *Hyg* 2006;100(7):615-22. doi: 10.1016/j.trstmh.2005.09.021 [published Online First:  
32 2006/03/23]  
33  
34 56. Seneff M, Knaus WA. Predicting patient outcome from intensive care: A guide to APACHE,  
35 MPM, SAPS, PRISM, and other prognostic scoring systems. *Journal of Intensive Care*  
36 *Medicine* 1990;5(1):33-52.  
37  
38 57. Aggarwal HK, Jain D, Rao A, et al. Role of Coma Acidosis Malaria Score in Patients with Severe  
39 Malaria among Indian Population: a Tertiary Care Center Experience. *Eurasian J Med*  
40 2017;49(1):30-35. doi: 10.5152/eurasianjmed.2017.16069 [published Online First:  
41 2017/04/19]  
42  
43  
44

#### 45 **Figures Legends:**

46  
47 **Figure 1: Flow chart showing reasons for exclusion of various studies from the review**  
48  
49  
50  
51  
52  
53  
54  
55  
56  
57  
58  
59  
60

1  
2  
3  
4  
5  
6  
7  
8  
9  
10  
11  
12  
13  
14  
15  
16  
17  
18  
19  
20  
21  
22  
23  
24  
25  
26  
27  
28  
29  
30  
31  
32  
33  
34  
35  
36  
37  
38  
39  
40  
41  
42  
43  
44  
45  
46  
47  
48  
49  
50  
51  
52  
53  
54  
55  
56  
57  
58  
59  
60

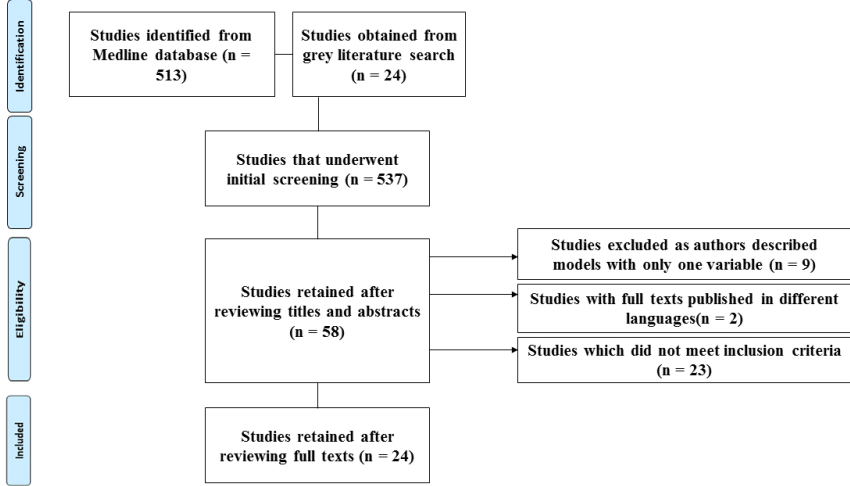

Flow chart showing reasons for exclusion of various studies from the review

Appendix 1: PRISMA-P 2015 Checklist. From: Shamseer L, Moher D, Clarke M, Ghersi D, Liberati A, Petticrew M, Shekelle P, Stewart L, PRISMA-P Group. Preferred reporting items for systematic review and meta-analysis protocols (PRISMA-P) 2015: elaboration and explanation. BMJ. 2015 Jan 2;349(jan02 1):g7647.

| Section/topic                     | #  | Checklist item                                                                                                                                                                                  | Information reported                |                                     | Page (s) |
|-----------------------------------|----|-------------------------------------------------------------------------------------------------------------------------------------------------------------------------------------------------|-------------------------------------|-------------------------------------|----------|
|                                   |    |                                                                                                                                                                                                 | Yes                                 | No                                  |          |
| <b>ADMINISTRATIVE INFORMATION</b> |    |                                                                                                                                                                                                 |                                     |                                     |          |
| <b>Title</b>                      |    |                                                                                                                                                                                                 |                                     |                                     |          |
| <b>Identification</b>             | 1a | Identify the report as a systematic review                                                                                                                                                      | <input checked="" type="checkbox"/> | <input type="checkbox"/>            | 1        |
| <b>Update</b>                     | 1b | If the protocol is for an update of a previous systematic review, identify as such                                                                                                              | <input type="checkbox"/>            | <input checked="" type="checkbox"/> |          |
| <b>Registration</b>               | 2  | If registered, provide the name of the registry (e.g., PROSPERO) and registration number in the Abstract                                                                                        | <input type="checkbox"/>            | <input checked="" type="checkbox"/> |          |
| <b>Authors</b>                    |    |                                                                                                                                                                                                 |                                     |                                     |          |
| <b>Contact</b>                    | 3a | Provide name, institutional affiliation, and e-mail address of all protocol authors; provide physical mailing address of corresponding author                                                   | <input checked="" type="checkbox"/> | <input type="checkbox"/>            | 1        |
| <b>Contributions</b>              | 3b | Describe contributions of protocol authors and identify the guarantor of the review                                                                                                             | <input checked="" type="checkbox"/> | <input type="checkbox"/>            | 14       |
| <b>Amendments</b>                 | 4  | If the protocol represents an amendment of a previously completed or published protocol, identify as such and list changes; otherwise, state plan for documenting important protocol amendments | <input type="checkbox"/>            | <input checked="" type="checkbox"/> |          |
| <b>Support</b>                    |    |                                                                                                                                                                                                 |                                     |                                     |          |
| <b>Sources</b>                    | 5a | Indicate sources of financial or other support for the review                                                                                                                                   | <input checked="" type="checkbox"/> | <input type="checkbox"/>            | 13       |
| <b>Sponsor</b>                    | 5b | Provide name for the review funder and/or sponsor                                                                                                                                               | <input type="checkbox"/>            | <input checked="" type="checkbox"/> |          |
| <b>Role of sponsor/funder</b>     | 5c | Describe roles of funder(s), sponsor(s), and/or institution(s), if any, in developing the protocol                                                                                              | <input type="checkbox"/>            | <input checked="" type="checkbox"/> |          |
| <b>INTRODUCTION</b>               |    |                                                                                                                                                                                                 |                                     |                                     |          |
| <b>Rationale</b>                  | 6  | Describe the rationale for the review in the context of what is already known                                                                                                                   | <input checked="" type="checkbox"/> | <input type="checkbox"/>            | 3        |



|                                           |     |                                                                                                                                                                                                                           |                                     |                                     |     |
|-------------------------------------------|-----|---------------------------------------------------------------------------------------------------------------------------------------------------------------------------------------------------------------------------|-------------------------------------|-------------------------------------|-----|
| <b>Objectives</b>                         | 7   | Provide an explicit statement of the question(s) the review will address with reference to participants, interventions, comparators, and outcomes (PICO)                                                                  | <input checked="" type="checkbox"/> | <input type="checkbox"/>            | 3   |
| <b>METHODS</b>                            |     |                                                                                                                                                                                                                           |                                     |                                     |     |
| <b>Eligibility criteria</b>               | 8   | Specify the study characteristics (e.g., PICO, study design, setting, time frame) and report characteristics (e.g., years considered, language, publication status) to be used as criteria for eligibility for the review | <input checked="" type="checkbox"/> | <input type="checkbox"/>            | 3   |
| <b>Information sources</b>                | 9   | Describe all intended information sources (e.g., electronic databases, contact with study authors, trial registers, or other grey literature sources) with planned dates of coverage                                      | <input checked="" type="checkbox"/> | <input type="checkbox"/>            | 4   |
| <b>Search strategy</b>                    | 10  | Present draft of search strategy to be used for at least one electronic database, including planned limits, such that it could be repeated                                                                                | <input checked="" type="checkbox"/> | <input type="checkbox"/>            | App |
| <b>STUDY RECORDS</b>                      |     |                                                                                                                                                                                                                           |                                     |                                     |     |
| <b>Data management</b>                    | 11a | Describe the mechanism(s) that will be used to manage records and data throughout the review                                                                                                                              | <input checked="" type="checkbox"/> | <input type="checkbox"/>            | 4   |
| <b>Selection process</b>                  | 11b | State the process that will be used for selecting studies (e.g., two independent reviewers) through each phase of the review (i.e., screening, eligibility, and inclusion in meta-analysis)                               | <input checked="" type="checkbox"/> | <input type="checkbox"/>            | 4   |
| <b>Data collection process</b>            | 11c | Describe planned method of extracting data from reports (e.g., piloting forms, done independently, in duplicate), any processes for obtaining and confirming data from investigators                                      | <input checked="" type="checkbox"/> | <input type="checkbox"/>            | 4   |
| <b>Data items</b>                         | 12  | List and define all variables for which data will be sought (e.g., PICO items, funding sources), any pre-planned data assumptions and simplifications                                                                     | <input checked="" type="checkbox"/> | <input type="checkbox"/>            | 4   |
| <b>Outcomes and prioritization</b>        | 13  | List and define all outcomes for which data will be sought, including prioritization of main and additional outcomes, with rationale                                                                                      | <input checked="" type="checkbox"/> | <input type="checkbox"/>            | 4   |
| <b>Risk of bias in individual studies</b> | 14  | Describe anticipated methods for assessing risk of bias of individual studies, including whether this will be done at the outcome or study level, or both; state how this information will be used in data synthesis      | <input checked="" type="checkbox"/> | <input type="checkbox"/>            | 4   |
| <b>DATA</b>                               |     |                                                                                                                                                                                                                           |                                     |                                     |     |
| <b>Synthesis</b>                          | 15a | Describe criteria under which study data will be quantitatively synthesized                                                                                                                                               | <input type="checkbox"/>            | <input checked="" type="checkbox"/> |     |

|                                          |     |                                                                                                                                                                                                                                             |                                     |                                     |   |
|------------------------------------------|-----|---------------------------------------------------------------------------------------------------------------------------------------------------------------------------------------------------------------------------------------------|-------------------------------------|-------------------------------------|---|
|                                          | 15b | If data are appropriate for quantitative synthesis, describe planned summary measures, methods of handling data, and methods of combining data from studies, including any planned exploration of consistency (e.g., $I^2$ , Kendall's tau) | <input type="checkbox"/>            | <input checked="" type="checkbox"/> |   |
|                                          | 15c | Describe any proposed additional analyses (e.g., sensitivity or subgroup analyses, meta-regression)                                                                                                                                         | <input type="checkbox"/>            | <input checked="" type="checkbox"/> |   |
|                                          | 15d | If quantitative synthesis is not appropriate, describe the type of summary planned                                                                                                                                                          | <input checked="" type="checkbox"/> | <input type="checkbox"/>            | 5 |
| <b>Meta-bias(es)</b>                     | 16  | Specify any planned assessment of meta-bias(es) (e.g., publication bias across studies, selective reporting within studies)                                                                                                                 | <input type="checkbox"/>            | <input checked="" type="checkbox"/> |   |
| <b>Confidence in cumulative evidence</b> | 17  | Describe how the strength of the body of evidence will be assessed (e.g., GRADE)                                                                                                                                                            | <input checked="" type="checkbox"/> | <input type="checkbox"/>            | 5 |

## Information sources

### Electronic sources

### Appendix 2: Search strategy for Medline database

| Searches | Search combinations | Search terms                                                                                                                                                        | Number of hits |
|----------|---------------------|---------------------------------------------------------------------------------------------------------------------------------------------------------------------|----------------|
| S1       |                     | "prognost* model" OR "predict* model" OR "Predictive Value of Tests"                                                                                                | 203,728        |
| S2       |                     | "predict* score" OR "prognos* score"                                                                                                                                | 3,655          |
| S3       | S1 OR S2            |                                                                                                                                                                     | 206,531        |
| S4       |                     | (MH "Malaria+") OR (MH "Malaria, Vivax") OR (MH "Malaria, Cerebral") OR (MH "Malaria, Falciparum+") OR (MH "Malaria, Avian")                                        | 62,414         |
| S5       |                     | "Malaria" OR "vivax malaria" OR "falciparum malaria" OR "cerebral malaria" OR "severe malaria" OR "clinical malaria" OR plasmodium OR antimalaria* OR anti-malaria* | 109,371        |



|    |           |  |         |
|----|-----------|--|---------|
| S6 | S4 OR S5  |  | 664,548 |
| S7 | S3 AND S6 |  | 513     |

**Appendix 3a and 3b: Assessment was done using the Quality Assessment Tool for Observational Studies of the National Health Institute/National Heart, Lung, and Blood Institute**

|   | Criteria                                                                                                                                                                                                                                   | Brickley | Webber | Njim | Conroy <sup>a</sup> | Molyneux | Marsh | Krishna | Jaffar | Newton <sup>a</sup> | Helbok <sup>a</sup> | von Seidlein | Conroy <sup>b</sup> | Gerardin |
|---|--------------------------------------------------------------------------------------------------------------------------------------------------------------------------------------------------------------------------------------------|----------|--------|------|---------------------|----------|-------|---------|--------|---------------------|---------------------|--------------|---------------------|----------|
| 1 | Was the research question or objective in this paper clearly stated?                                                                                                                                                                       | Yes      | Yes    | Yes  | Yes                 | Yes      | Yes   | Yes     | Yes    | Yes                 | Yes                 | Yes          | Yes                 | Yes      |
| 2 | Was the study population clearly specified and defined?                                                                                                                                                                                    | Yes      | No     | Yes  | Yes                 | Yes      | Yes   | Yes     | Yes    | Yes                 | NC                  | Yes          | Yes                 | Yes      |
| 3 | Was the participation rate of eligible persons at least 50%?                                                                                                                                                                               | NC       | NC     | Yes  | NC                  | NC       | No    | NC      | NC     | NC                  | NC                  | NC           | NC                  | Yes      |
| 4 | Were all the subjects selected or recruited from the same or similar populations (including the same time period)?<br>Were inclusion and exclusion criteria for being in the study prespecified and applied uniformly to all participants? | Yes      | Yes    | Yes  | Yes                 | Yes      | Yes   | Yes     | Yes    | Yes                 | Yes                 | Yes          | Yes                 | Yes      |

|    |                                                                                                                                                                                                               |     |     |     |     |     |     |     |     |     |     |     |     |     |
|----|---------------------------------------------------------------------------------------------------------------------------------------------------------------------------------------------------------------|-----|-----|-----|-----|-----|-----|-----|-----|-----|-----|-----|-----|-----|
| 5  | Was a sample size justification, power description, or variance and effect estimates provided?                                                                                                                | No  | No  | No  | Yes | No  | No  | No  | No  | No  | NC  | NC  | NC  | No  |
| 6  | For the analyses in this paper, were the exposure(s) of interest measured prior to the outcome(s) being measured?                                                                                             | Yes |
| 7  | Was the timeframe sufficient so that one could reasonably expect to see an association between exposure and outcome if it existed?                                                                            | Yes |
| 8  | For exposures that can vary in amount or level, did the study examine different levels of the exposure as related to the outcome (e.g., categories of exposure, or exposure measured as continuous variable)? | Yes |
| 9  | Were the exposure measures (independent variables) clearly defined, valid, reliable, and implemented consistently across all study participants?                                                              | Yes |
| 10 | Was the exposure(s) assessed more than once over time?                                                                                                                                                        | No  | No  | No  | No  | Yes | Yes | Yes | Yes | Yes | Yes | No  | NC  | NC  |
| 11 | Were the outcome measures (dependent variables) clearly defined, valid, reliable, and implemented consistently across all study participants?                                                                 | Yes |
| 12 | Were the outcome assessors blinded to the exposure status of participants?                                                                                                                                    | NC  | No  | NC  |
| 13 | Was loss to follow-up after baseline 20% or less?                                                                                                                                                             | Yes | Yes | Yes | NC  | Yes |
| 14 | Were key potential confounding variables measured and adjusted statistically for their impact on the relationship between exposure(s) and outcome(s)?                                                         | Yes |
|    | Quality rating                                                                                                                                                                                                |     |     |     |     |     |     |     |     |     |     |     |     |     |

|  |             |      |      |      |      |      |      |      |      |      |      |      |      |      |
|--|-------------|------|------|------|------|------|------|------|------|------|------|------|------|------|
|  | Rater #1 TN | Good | Fair | Good |
|  | Rater #2 OA | Good | Fair | Good |

\*Not clear; Newton<sup>a</sup>: Study carried out in 2005; Conroy<sup>a</sup>: study carried out in 2012; Conroy<sup>b</sup>: study carried out in 2015; Helbok<sup>a</sup>: study carried out in 2009

|    | Criteria                                                                                                                                                                                                                                | Wilairatana | Dondorp | Mishra | Hanson <sup>a</sup> | Hanson <sup>b</sup> | Mohapatra <sup>a</sup> | Mohapatra <sup>b</sup> | Newton <sup>b</sup> | Helbok <sup>b</sup> | Helbok <sup>c</sup> | Helbok <sup>d</sup> |
|----|-----------------------------------------------------------------------------------------------------------------------------------------------------------------------------------------------------------------------------------------|-------------|---------|--------|---------------------|---------------------|------------------------|------------------------|---------------------|---------------------|---------------------|---------------------|
| 1  | Was the research question or objective in this paper clearly stated?                                                                                                                                                                    | Yes         | Yes     | Yes    | Yes                 | Yes                 | Yes                    | Yes                    | Yes                 | Yes                 | Yes                 | Yes                 |
| 2  | Was the study population clearly specified and defined?                                                                                                                                                                                 | Yes         | No      | Yes    | Yes                 | Yes                 | Yes                    | Yes                    | Yes                 | Yes                 | Yes                 | Yes                 |
| 3  | Was the participation rate of eligible persons at least 50%?                                                                                                                                                                            | NC          | NC      | NC     | Yes                 | Yes                 | Yes                    | NC                     | NC                  | Yes                 | NC                  | Yes                 |
| 4  | Were all the subjects selected or recruited from the same or similar populations (including the same time period)? Were inclusion and exclusion criteria for being in the study prespecified and applied uniformly to all participants? | Yes         | Yes     | Yes    | Yes                 | Yes                 | Yes                    | Yes                    | Yes                 | Yes                 | Yes                 | Yes                 |
| 5  | Was a sample size justification, power description, or variance and effect estimates provided?                                                                                                                                          | No          | No      | No     | No                  | No                  | No                     | No                     | No                  | No                  | No                  | No                  |
| 6  | For the analyses in this paper, were the exposure(s) of interest measured prior to the outcome(s) being measured?                                                                                                                       | Yes         | Yes     | Yes    | Yes                 | Yes                 | Yes                    | Yes                    | Yes                 | Yes                 | Yes                 | Yes                 |
| 7  | Was the timeframe sufficient so that one could reasonably expect to see an association between exposure and outcome if it existed?                                                                                                      | Yes         | Yes     | Yes    | Yes                 | Yes                 | Yes                    | Yes                    | Yes                 | Yes                 | Yes                 | Yes                 |
| 8  | For exposures that can vary in amount or level, did the study examine different levels of the exposure as related to the outcome (e.g., categories of exposure, or exposure measured as continuous variable)?                           | Yes         | Yes     | Yes    | Yes                 | Yes                 | Yes                    | Yes                    | Yes                 | Yes                 | Yes                 | Yes                 |
| 9  | Were the exposure measures (independent variables) clearly defined, valid, reliable, and implemented consistently across all study participants?                                                                                        | Yes         | Yes     | Yes    | Yes                 | Yes                 | Yes                    | Yes                    | Yes                 | Yes                 | Yes                 | Yes                 |
| 10 | Was the exposure(s) assessed more than once over time?                                                                                                                                                                                  | Yes         | No      | No     | Yes                 | Yes                 | Yes                    | Yes                    | NC                  | Yes                 | Yes                 | No                  |

|    |                                                                                                                                                       |      |      |      |      |      |      |      |      |      |      |      |
|----|-------------------------------------------------------------------------------------------------------------------------------------------------------|------|------|------|------|------|------|------|------|------|------|------|
| 11 | Were the outcome measures (dependent variables) clearly defined, valid, reliable, and implemented consistently across all study participants?         | Yes  | NC   |
| 12 | Were the outcome assessors blinded to the exposure status of participants?                                                                            | NC   | No   | NC   |
| 13 | Was loss to follow-up after baseline 20% or less?                                                                                                     | Yes  |
| 14 | Were key potential confounding variables measured and adjusted statistically for their impact on the relationship between exposure(s) and outcome(s)? | Yes  |
|    | Quality rating                                                                                                                                        |      |      |      |      |      |      |      |      |      |      |      |
|    | Rater #1 TN                                                                                                                                           | Good | Fair | Good |
|    | Rater #2 OA                                                                                                                                           | Good | Fair | Good |

Hanson<sup>a</sup>: Study carried out in 2010; Hanson<sup>b</sup>: study carried out in 2014; Mohapatra<sup>a</sup>: study carried out in 2009; Mohapatra<sup>b</sup>: study carried out in 2014;

Helbok<sup>b</sup>: study carried out in 2003; Helbok<sup>c</sup>: study carried out in 2006; Helbok<sup>d</sup>: study carried out in 2005

1  
2  
3  
4  
5  
6  
7  
8  
9  
10  
11  
12  
13  
14  
15  
16  
17  
18  
19  
20  
21  
22  
23  
24  
25  
26  
27  
28  
29  
30  
31  
32  
33  
34  
35  
36  
37  
38  
39  
40  
41  
42  
43  
44  
45  
46  
47  
48  
49  
50  
51  
52  
53  
54  
55  
56  
57  
58  
59  
60

For peer review only

# BMJ Open

## Prognostic models for the clinical management of malaria and its complications: a systematic review

|                                 |                                                                                                   |
|---------------------------------|---------------------------------------------------------------------------------------------------|
| Journal:                        | <i>BMJ Open</i>                                                                                   |
| Manuscript ID                   | bmjopen-2019-030793.R1                                                                            |
| Article Type:                   | Original research                                                                                 |
| Date Submitted by the Author:   | 18-Sep-2019                                                                                       |
| Complete List of Authors:       | Njim, Tsi; Regional Hospital Bamenda, Surgical Department Tanyitiku, Bayee; University of Bamenda |
| <b>Primary Subject Heading</b>: | Global health                                                                                     |
| Secondary Subject Heading:      | Epidemiology, Public health                                                                       |
| Keywords:                       | malaria, prognostic model, prognostic score, mortality                                            |
|                                 |                                                                                                   |

SCHOLARONE™  
Manuscripts

1  
2  
3 **Prognostic models for the clinical management of malaria and its complications: a systematic**  
4 **review**  
5

6  
7 **Authors:** Tsi Njim<sup>1</sup> & Bayee Swiri Tanyitiku<sup>2</sup>  
8

9 **Authors' information**  
10

11 <sup>1</sup> Health and Human Development (2HD) Research Network, Douala, Cameroon  
12

13 <sup>2</sup> Faculty of Social and Management Sciences, University of Bamenda, Bamenda, Cameroon  
14

15  
16 **\* Correspondence to:**  
17

18 Dr Tsi Njim, Health and Human Development Research Network, Douala, Cameroon. Email:  
19

20 [tsinjim@gmail.com](mailto:tsinjim@gmail.com). Phone number: +237 6774422905  
21  
22

23 **Email addresses**  
24

25 TN: [tsinjim@gmail.com](mailto:tsinjim@gmail.com) ; BST: [bstanyitiku@gmail.com](mailto:bstanyitiku@gmail.com)  
26  
27  
28  
29  
30  
31  
32  
33  
34  
35  
36  
37  
38  
39  
40  
41  
42  
43  
44  
45  
46  
47  
48  
49  
50  
51  
52  
53  
54  
55  
56  
57  
58  
59  
60

## Abstract

**Objective:** Malaria infection could result in severe disease with high mortality. Prognostic models and scores predicting severity of infection, complications and mortality could help clinicians prioritise patients. We conducted a systematic review to assess the various models that have been produced to predict disease severity and mortality in patients infected with malaria.

**Design:** A systematic review.

**Data sources:** Medline, Global health and CINAHL were searched up to 04<sup>th</sup> of September 2019.

**Eligibility criteria for selecting studies:** Published articles on models which used at least 2 points (or variables) of patient data to predict disease severity; potential development of complications (including coma or cerebral malaria; shock; acidosis; severe anaemia; acute kidney injury; hypoglycaemia; respiratory failure and sepsis) and mortality in patients with malaria infection.

**Data extraction and synthesis:** Two independent reviewers extracted the data and assessed risk of bias using the Prediction model Risk Of Bias Assessment Tool (PROBAST).

**Results:** A total of 564 articles were screened and 24 articles were retained describing 24 models/scores of interests. Three of the articles described models predicting complications of malaria (severe anaemia in children and development of sepsis); fifteen described original models predicting mortality in severe malaria; three described models predicting mortality in different contexts but adapted and validated to predict mortality in malaria; and four articles described models predicting severity of the disease.

For the models predicting mortality, all the models had neurologic dysfunction as a predictor; in children, half of the models contained hypoglycaemia and respiratory failure as a predictor meanwhile, six out of the nine models in adults had respiratory failure as a clinical predictor. Acidosis, renal failure and shock were also common predictors of mortality.

Eighteen of the articles described models that could be applicable in real-life settings and all the articles had a high risk of bias due to lack of use of consistent and up-to-date methods of internal validation.

**Conclusion:** Evidence is lacking on the generalisability of most of these models due lack of external validation. Emphasis should be placed on external validation of existing models and publication of the findings of their use in clinical settings to guide clinicians on management options depending on the priorities of their patients.

**Key words:** malaria; prognostic model; prognostic score; mortality

**Prospero registration number:** CRD42019130673



## Article Summary:

### Strengths and limitations of this review:

This review is the first to comprehensively summarise the various prognostic models that have been produced to identify complications, severity and risk of mortality in patients with severe malaria.

The review covers prognostic models produced worldwide and for all the various malaria species.

The review reduced the risk of bias by using an independent review process for the screening of potential articles and the extraction of data.

Considering the wide variety of statistical methods used to generate and validate these models, there is the risk of heterogeneity in interpretation of the results.

The search was carried out in only one language which could potentially exclude some relevant studies published in different languages.

### Introduction

Malaria is a disease caused by infection with a protozoan parasite of the genus *Plasmodium*. The most relevant of these species is *Plasmodium falciparum* as it causes most deaths from the disease<sup>1</sup>.

Another species of relevance is *Plasmodium vivax* which is predominantly found in Asia and has a wider distribution<sup>2</sup>. Malaria infection can result in severe disease and is associated with a high mortality. In about 108 countries where the transmission of the disease still occurs, an estimated 435,000 people died in 2017<sup>3,4</sup>.

The incidence of malaria cases has decreased by 41% worldwide in the past ten years, with about 17 countries in Latin America and the Middle East reporting no new cases of malaria over this period<sup>3,5</sup>. There are however concerns that the fight against malaria might be slowed down by an overemphasis on prevention over treatment<sup>6</sup>.

Treatment and clinical management of malaria is made difficult due to potential evolution of simple infections into life-threatening severe disease; the multi-organ affection of severe disease; the dilemma of when to admit to intensive care units (ICU) considering limited resources and the occurrence of concomitant sepsis infection with malaria<sup>7,8</sup>. Some of these issues can be addressed with the help of guidelines; scores or models that could help clinicians predict the occurrence of severe disease and complications in order to act appropriately.

We therefore conducted this review to systematically assess the various predictive models or scores available to guide clinicians in the management of severe malaria, whether these models have been validated and if there is any evidence that they are being successfully used in the clinical setting.

### Methods

1  
2  
3 Institutional review board approval and informed consent were not required for this systematic  
4 review. We reported our findings according to Preferred Reporting Items for Systematic Reviews and  
5 Meta-Analysis (PRISMA) guidelines (Appendix 1).  
6  
7

### 8 **Search strategy and selection criteria**

9  
10 We searched MEDLINE, CINAHL and Global Health databases using a tailored search strategy  
11 (Appendix 2) to identify all the relevant titles and abstracts of studies (randomised control trials,  
12 cohort, cross-sectional and case-control studies) published in English from inception of the database  
13 up to the 04<sup>th</sup> of September 2019, that reported predictive/prognostic scores or models that could be  
14 used in the management of malaria. These included:  
15  
16  
17

- 18 - Scores/models that predicted the severity of disease as this could guide clinicians' decisions  
19 to admit for intensive care management or the use of parenteral treatment;
- 20 - Scores/models that predicted the potential development of complications (including coma or  
21 cerebral malaria; shock; acidosis; severe anaemia; acute kidney injury; hypoglycaemia;  
22 respiratory failure and sepsis);
- 23 - Scores/models that predicted mortality in patients with malaria infection.  
24  
25  
26  
27  
28

29 The main keywords in the search strategy included: "prognostic model/score", "predictive  
30 model/score" and "predictive value of tests" coupled with "malaria", "plasmodium", "anti-malarials",  
31 "malaria falciparum", "malaria vivax" and "clinical malaria". We further canvassed the references of  
32 eligible papers to identify similar papers for review.  
33  
34  
35

36 We excluded any duplicate studies, editorials, systematic reviews, case studies, conference abstracts,  
37 unpublished studies and expert commentaries. For studies with more than one publication of findings,  
38 we selected the most recent publication.  
39  
40

41 We also excluded studies which contained models or scores that were aimed at the diagnosis of  
42 malaria as we intend to limit the scope of the review to only models that could be used to predict  
43 severity, mortality or risk of complications – that could guide clinicians in their management options.  
44 Studies that used animal models to predict disease severity were also excluded.  
45  
46  
47

48 Two independent reviewers (TN and BST) screened the titles and abstracts for compliance to the  
49 aforementioned inclusion and exclusion criteria and any conflicts were settled by mutual agreement.  
50 Articles considered to have data relevant to the topic were assessed in detail and the references cited  
51 in these publications were searched to identify further publications.  
52  
53  
54

### 55 **Data extraction**

56  
57 Data extraction sheets which were prepared prior to screening were used by the two independent  
58 reviewers to obtain the following details for inclusion into the final review: Last name of first author;  
59  
60

1  
2  
3 date of publication; period of patient recruitment and/or follow-up; country of study; sample size; age  
4 group; type of predictive model; name of model; method of internal validation (calibration and  
5 discrimination); diagnostic properties of model and evidence of external validation or use in clinical  
6 settings.  
7  
8  
9

### 10 **Definitions**

11  
12 By prognostic/predictive model, we mean a statistical tool which uses at least 2 points (or variables) of  
13 patient data to predict a specific clinical outcome <sup>9</sup>. Prognostic models applied in clinical settings are  
14 usually used at the discretion of physicians for accurate future predictions based on characteristics  
15 gathered in the present <sup>9 10</sup>. The information found in prognostic models is usually specific to the  
16 patients' characteristics rather than the disease or treatment and includes: prediction of chance or the  
17 duration of survival; classification of patients into risk groups; and prediction of clinical events related  
18 to the treatment the patient is receiving <sup>11</sup>.  
19  
20  
21  
22  
23

24 For models that used the area under the curve (AUC) or c-statistic to assess discrimination, the following  
25 classification was used: 0.90 - 1 – excellent; 0.80 - 0.90 – good; 0.70 - 0.80 – fair; 0.60 - 0.70 – poor  
26 and 0.50 - 0.60 – very poor discriminative properties <sup>12</sup>.  
27  
28  
29

### 30 **Data synthesis and analysis**

31 We assessed and discussed the selected studies qualitatively to describe the diagnostic properties of  
32 the models proposed in the study, their intended purpose and evidence of use of the model in other  
33 clinical settings.  
34  
35  
36

37 We further divided the models into various categories: models used to predict a potential complication  
38 of severe malaria; models used to predict mortality as an outcome and models used to predict severity  
39 of malaria infection.  
40  
41  
42

### 43 **Assessment of risk of bias and applicability**

44 The risk of bias and applicability of the models in the various studies were assessed by the two  
45 independent reviewers using the Prediction model Risk Of Bias Assessment Tool (PROBAST) <sup>13 14</sup>  
46 (Appendix 3). Any disagreements were handled by mutual agreement.  
47  
48  
49

### 50 **Patient and public involvement:**

51 Patients and the public were not involved in the design and conduction of this review.  
52  
53  
54  
55

### 56 **Results**

1  
2  
3 A total of 564 articles were identified by the electronic search of the databases. The titles and  
4 abstracts of these articles were screened to retain 59 articles for full text review. These were then  
5 evaluated according to the inclusion criteria and 24 articles were identified describing 24  
6 models/scores of interests; after eliminating 23 irrelevant articles, 9 articles which used only one  
7 variable to predict an outcome and two articles describing models in other languages (Figure 1). Two  
8 of the articles described models predicting complications of malaria<sup>8 15</sup>; fifteen described original  
9 models predicting mortality in severe malaria<sup>16-30</sup>; three described models predicting mortality in  
10 different contexts but adapted and validated to predict mortality in malaria<sup>31-33</sup>; and four articles  
11 described models predicting severity of the disease<sup>34-37</sup>.

12  
13  
14  
15  
16  
17  
18 Using the PROBAST to assess risk of bias and applicability, none of the studies had a low risk of bias  
19 while six studies were not found to be applicable in real-life settings<sup>15 16 22 34-36</sup> (Appendix 3).

20  
21  
22 The general characteristics of the studies included in the review are summarised in Tables 1, 2, 3 and  
23 4.

### 24 25 **Models predicting the risk of complications in malaria infection**

26  
27  
28 Webber *et al*<sup>15</sup> in 1997 conducted a study to predict the risk of severe anaemia (packed cell volume <  
29 15%) in children with severe malaria in the Gambia using logistic regression analysis. This model was  
30 not internally validated, and the two predictors identified were pallor of the conjunctiva and pallor of  
31 the palms. There is no evidence from this review that the model has been externally validated and is  
32 being used in clinical settings.

33  
34  
35  
36 In 2018, Njim *et al*<sup>8</sup> described a prognostic model for clinical use to predict the risk of sepsis  
37 development amongst adult patients (> 16 years old) admitted for severe falciparum malaria in  
38 Southeast Asia. They used data from SEQUAMAT (South East Asian Quinine Artesunate Malaria  
39 Trial) – a large randomised control trial (RCT) conducted to determine the benefits of intravenous  
40 artesunate over quinine treatment for severe malaria. They used a multivariable logistic regression  
41 approach with internal validation using bootstrapping to generate a prognostic model with modest  
42 discriminative abilities [area under the curve (AUC): 0.789] containing the following predictive  
43 variables: female sex, high blood urea nitrogen, high plasma anion gap, respiratory distress, shock on  
44 admission, high parasitaemia, coma and jaundice. The model has not been externally validated and  
45 there is no evidence of use in clinical settings.

### 46 47 **Models predicting mortality in severe malaria**

#### 48 49 ***Models predicting mortality in paediatric severe malaria***

50  
51  
52  
53 Ten articles described models that predicted mortality in paediatric severe malaria<sup>16 20-23 27 28 30-32</sup>.  
54  
55 Three articles described models which predicted mortality in paediatric patients with cerebral malaria  
56  
57  
58  
59  
60

1  
2  
3 16 21 27; two articles described models generated to assess mortality in different conditions that were  
4 validated for use in the present studies 31 32; and five articles described original models predicting the  
5 risk of mortality in children with severe malaria 20 22 23 28 30.  
6  
7

### 8 ***Models predicting mortality in paediatric cerebral malaria***

9  
10 Molyneux *et al* 27 in 1989 conducted a study amongst 131 comatose Malawian children with severe  
11 cerebral malaria to determine the prognostic factors for death in these patients. The authors derived a  
12 “bedside prognostic index” with: blood glucose  $\leq 2.2$  mmol/L; parasitaemia  $> 106$  ring forms/ $\mu$ L;  
13 white blood cell count  $> 15 \times 10^9$ /L; age  $\leq 3$  years; coma score (modification of the Glasgow coma  
14 score) = 0; absent corneal reflexes; signs of decerebration and convulsions; as predictors of mortality  
15 with each predictor assigned a score of 1. Individuals with a score  $\geq 4$  were more likely to die. This  
16 score was calculated only using univariable analysis and internal and external validation were not  
17 done.  
18  
19

20  
21  
22  
23  
24 In 1997 in Gambia, Jaffar *et al* 21 performed a retrospective analysis on data obtained from a  
25 randomised control trial during which artemether was compared with quinine and a monoclonal  
26 antibody against tumour necrosis factor (TNF) compared with a placebo in patients with cerebral  
27 malaria. They used this data to identify predictors of mortality in cerebral malaria using a  
28 multivariable logistic regression model. A cold periphery, a coma score of either 0 or 1 (assessed  
29 using the Blantyre coma scale measured on a scale of 0 – 5), and hypoglycaemia were found to be  
30 present at admission in 90% of the children who died. This model was not internally validated.  
31  
32

33  
34  
35  
36 Conroy *et al* 16 in 2012 conducted a study amongst 155 children aged 8 months – 14 years in Malawi  
37 to determine predictors of mortality in cerebral malaria. They used a multivariable logistic regression  
38 model containing clinical parameters and biomarkers with a modest discriminative ability (C-index of  
39 0.79) after internal validation; which contained the following variables: age, Blantyre coma score,  
40 respiratory distress, severe anaemia, angiopoietin-1, angiopoietin-2 and sTie-2 levels. The model was  
41 not externally validated.  
42  
43  
44

### 45 ***Original models predicting mortality in paediatric severe malaria***

46  
47  
48 Krishna *et al* 22 in 1994 conducted a study in the Gambia to predict mortality in children aged 8  
49 months to 14 years. They used a multivariable logistic regression model internally validated using the  
50 Wald statistic to determine that the coma score (using the Blantyre coma scale), whole blood  
51 lactate/glucose ratio and TNF level were the best predictors of death.  
52  
53

54  
55 In 1995, Marsh *et al* 23 studied 1844 children in Kenya to determine predictors of life-threatening  
56 malaria (risk of death) using a multivariable logistic regression model. They determined that impaired  
57 consciousness (assessed using the Blantyre coma scale), hypoglycaemia, respiratory distress and  
58  
59  
60

1  
2  
3 jaundice could correctly predict 84.4% of deaths in the sample population. The model was not  
4 validated internally or externally.  
5

6  
7 In 2005, Newton *et al*<sup>28</sup> conducted a study to assess the prognostic value of measures of acid/base  
8 balance in paediatric falciparum malaria. They examined 14,605 children in Malawi (Blantyre),  
9 Kenya (Kilifi) and Ghana (Kumasi); where they determined that deep breathing, Blantyre Coma  
10 Score, inability to sit, and weight-for-age Z score were independent predictors of mortality in all the  
11 three sites. Discrimination of the model was performed by calculating the area under the receiver  
12 operating curve (AUROC). After addition of laboratory data to these models – hypoglycaemia, base  
13 excess and lactate concentrations; the c-statistics obtained were 0.88 (Blantyre), 0.87 (Kilifi) and 0.83  
14 (Kumasi) denoting good discriminative properties of the models.  
15  
16  
17  
18  
19

20 Helbok *et al*<sup>20</sup> in 2009 produced the the Lambarene Organ Dysfunction Score (LODS) which  
21 combined three variables: coma, prostration, and deep breathing to generate a model using  
22 multivariable logistic regression which predicted death in African children – Banjul (Gambia),  
23 Blantyre (Malawi), Kilifi (Kenya), Kumasi (Ghana), and Lambarene and Libreville (Gabon); who  
24 were admitted for severe falciparum malaria. Each component of the model was assigned a score of 1  
25 and a LODS of 3 at admission had a 98% specificity and 25% sensitivity in predicting death.  
26  
27 Meanwhile a LODS  $\geq 1$  had a sensitivity of 85% and a specificity of 63%. The model had good  
28 discriminative properties with an AUC of 0.80 (95% CI: 0.79 – 0.82). In 2015, Conroy *et al*<sup>31</sup>  
29 externally validated this model amongst 1589 Ugandan children. The model showed good  
30 discriminative properties with an AUC of 0.898.  
31  
32  
33  
34  
35

36 Similarly, in 2012, von Seidlein *et al*<sup>30</sup> conducted an analysis of data from a RCT carried out in  
37 several African countries (Gambia, Mozambique, Nigeria, Rwanda, Kenya, DRC, Tanzania, Ghana  
38 and Uganda) to generate a model for predicting mortality from severe falciparum malaria using  
39 multivariable logistic regression analysis and internally validated by AUROC analysis. After analysis  
40 of data from 5426 children, base deficit, impaired consciousness (assessed using the Blantyre Coma  
41 Score), convulsions, elevated blood urea, and underlying chronic illness were identified in the model  
42 to predict mortality with a good discriminative ability – AUROC: 0.85 (95% CI: 0.83 - 0.87).  
43  
44  
45  
46  
47

#### 48 ***Existing Models validated for use in the prediction of mortality in severe malaria in children***

49  
50 As described above, Conroy *et al*<sup>31</sup> externally validated the LODS model amongst 1589 Ugandan  
51 children. The authors further externally validated two other scores: the SICK (Signs of Inflammation  
52 in Children that Kill) score which was developed in India as a practical triage tool using variables  
53 related to the systemic inflammatory response syndrome, with data collected from 1,099 children in  
54 2003 admitted for any paediatric illness<sup>38</sup>; and the PEDIA (Pediatric Early Death Index for Africa)  
55 score which was developed to predict early death amongst 8091 children in Kenya in 2003 admitted  
56 for paediatric illnesses<sup>39</sup>. The original SICK score containing the following variables: altered  
57  
58  
59  
60



1  
2  
3 consciousness, temperature, heart rate, respiratory rate, systolic blood pressure, capillary refill time  
4 and age; had good discriminative properties with an AUC of 0.887<sup>38</sup>. Externally validated against this  
5 cohort of 1589 children, the score maintained its good discriminative properties with an AUC of  
6 0.846. Similarly, the PEDIA score which originally had excellent discriminative properties with an  
7 AUC of 0.93<sup>39</sup> had good discriminative properties (AUC: 0.896) when externally validated on the  
8 cohort of 1589 Ugandan children<sup>31</sup>. The original PEDIA score contained Kwashiorkor, jaundice,  
9 subcostal indrawing, prostration ( $\pm$  seizures) and wasting as variables in the model. However,  
10 kwashiorkor was not included in the validation model as it was not measured amongst the Ugandan  
11 children.  
12  
13

14  
15  
16  
17  
18 In 2006, Gerardin *et al*<sup>32</sup> externally validated the PRISM (Pediatric Risk of Mortality) model which  
19 was originally developed in 1988 by Pollack *et al*<sup>40</sup> to reduce the number of physiologic variables  
20 required for paediatric intensive care unit death risk assessment. The model was developed from data  
21 of 1,227 patients with 105 deaths and contained 14 variables: systolic blood pressure, temperature,  
22 mental status, heart rate, dilatation of pupils, pH, total CO<sub>2</sub>, PCO<sub>2</sub>, arterial PaO<sub>2</sub>, serum glucose,  
23 potassium, urea, creatinine, white blood cells, prothrombin time, platelet count. The original score had  
24 excellent discriminative properties with an AUC of 0.92<sup>40</sup>. Gerardin *et al* used a cohort of 311  
25 Senegalese children admitted with severe malaria to externally validate this model. The model  
26 showed good discriminative properties in predicting death in children with severe malaria – AUC:  
27 0.86 (95% CI: 0.81– 0.90)<sup>32</sup>.  
28  
29  
30  
31  
32  
33

### 34 **Models predicting mortality in adult severe malaria**

35  
36  
37 There were eight articles assessing models that predicted mortality in adult severe malaria<sup>17-19 24-26 28</sup>  
38  
39  
40  
41

42 In 1995, Wilairatana *et al*<sup>41</sup> used the APACHE II score (the acute physiology and chronic health  
43 evaluation system score commonly used in intensive care units) based on 12 physiologic variables –  
44 Mean arterial pressure (MAP), temperature, heart rate, respiratory rate, arterial pH, PaO<sub>2</sub>,  
45 haematocrit, WBC count, creatinine, sodium, potassium and Glasgow coma score to predict the risk  
46 of mortality in adult patients with cerebral malaria in Thailand. The score was able to predict  
47 mortality with a 95.8% accuracy. The original APACHE II model was produced in 1985 by Knaus *et*  
48 *al*<sup>42</sup>, and clinical judgement and physiologic relationships were used to assign weightings for the  
49 various factors in the model.  
50  
51  
52  
53

54 Dondorp *et al*<sup>17</sup> in 2004 created a model using logistic regression with laboratory data from 268  
55 patients in Vietnam to determine the risk of mortality in adult patients with severe malaria. This  
56 model had a good discriminative value with an AUROC of 0.81. The laboratory variables associated  
57 with mortality in this cohort were: plasma lactate, plasma creatinine and a strong anion gap. On the  
58 other hand, in 2007, Mishra *et al*<sup>24</sup> created the MSA (Malaria score for adults) and the MPS (Malaria  
59  
60

1  
2  
3 prediction score) from a cohort of 212 patients in India to predict mortality in severe malaria. The  
4 MSA was an upgrade of the Malaria prognostic index (MPI) which required laboratory data and  
5 included a small proportion of children. The clinical variables included in the MSA were: severe  
6 anaemia, acute renal failure, respiratory distress and cerebral malaria and had a sensitivity of 89.9%  
7 and a specificity of 70.6%. This model was externally validated by Santos *et al*<sup>43</sup> among 59 patients  
8 with imported severe malaria in Portugal and was shown to have good discriminative properties –  
9 AUROC: 0.84; 95% CI: 0.70 – 0.98.  
10  
11

12  
13  
14  
15 Similarly, Hanson *et al*<sup>18</sup> produced the coma acidosis malaria (CAM) score after using a logistic  
16 regression analysis on data previously collected from the SEQUAMAT. The authors proposed the use  
17 of the presence of a coma and base deficit to calculate a five-point score to predict mortality. The  
18 score had good discriminative properties with an AUROC of 0.81 (95% CI: 0.77 – 0.84). The same  
19 author used data from several cohort studies and RCTs carried out in Bangladesh, India, Indonesia,  
20 Vietnam and Myanmar to predict 48-hour survival and survival to discharge in patients with severe  
21 malaria<sup>19</sup>. The model containing the variables: shock, oligo-anuria, dysglycaemia, respiratory rate,  
22 Glasgow coma score and fever could correctly predict 48 hour-survival in 99.4% of the patients and  
23 survival to discharge in 96.9% of patients.  
24  
25  
26  
27  
28  
29

30 Mohapatra *et al*<sup>26</sup> in 2009 carried out a cohort study of 2089 patients in 2009, where they produced  
31 the Malaria severity score (MSS) to predict mortality in adult patients with severe falciparum malaria  
32 in India. They assessed seven organ systems: neurologic, renal, haematologic, hepatic, respiratory,  
33 cardiovascular, and metabolic organ systems; assigning a maximum score of 0 – 3 for each organ  
34 system. The model had excellent discriminative properties with an AUROC of 0.9. The authors also  
35 developed the GCRBS (Glasgow coma scale, creatinine, respiratory rate, bilirubin and systolic BP)  
36 score in 2014 as an alternative to other scores like the APACHE II score which was considered  
37 cumbersome<sup>25</sup>. The score had a sensitivity of 85.3% and a specificity of 95.6% in predicting a fatal  
38 outcome in severe malaria.  
39  
40  
41  
42  
43  
44

45 In 2013 in Thailand, Newton *et al*<sup>29</sup> conducted a retrospective analysis of 988 records with severe  
46 falciparum malaria to produce the MPI (Malaria prognostic index) validated using ROC curve  
47 analysis and internal validation by data splitting. The MPI contained the following variables: Glasgow  
48 coma scale, parasitaemia, plasma lactate, serum bilirubin, pigmented parasites and treatment with  
49 ACT and had excellent discriminative properties with an AUROC of 0.97.  
50  
51  
52

### 53 **Models predicting the severity of malaria**

54  
55 The Multi-organ dysfunction score (MODS) which is an index used in severely ill patients admitted in  
56 intensive care units to determine the severity of their disease irrespective of the diagnosis<sup>34,44</sup>. The  
57 score evaluates ten organ systems: heart, blood vessel, blood, respiratory system, metabolism,  
58 gastrointestinal system, liver, kidney and urinary tract, immune system, and central nervous system –  
59  
60



1  
2  
3 giving a score of 1 – 5 for each system depending on the level of dysfunction of the system, with a  
4 minimum score of 10 and a maximum score of 50<sup>35</sup>. Helbok *et al* assessed the use of this score to  
5 predict severity in a small cohort (n = 22) of adult patients with uncomplicated falciparum malaria<sup>35</sup>  
6 and in adults with severe malaria (n = 29)<sup>34</sup> in Thailand. The score was not internally validated in  
7 both studies but the authors showed that higher scores were correlated with symptom severity and  
8 duration of hospitalisation. In 2006, the authors used a simplified version of the score - Simplified  
9 MODS (sMODS); in a cohort of 485 children in Gabon to predict the level of severity of the disease  
10 with respect to the amount of disability the children suffered into categories: ability to walk unaided  
11 and ability to sit unaided<sup>36</sup>. The authors obtained an AUC of 0.92 (95% CI: 0.89, 0.95) in predicting  
12 inability to walk  $\geq$  48 hours for children with sMODS  $\geq$  16 and an AUC of 0.90 (95% CI: 0.87, 0.93)  
13 in predicting inability to sit unaided (Table 4).

14  
15  
16  
17  
18  
19  
20  
21 Grigg *et al* in 2018, used a multivariable logistic regression model to predict the severity of  
22 *Plasmodium knowlesi* malaria infection in a cohort of 481 participants in Malaysia. The authors  
23 showed that independent predictors of disease severity using the WHO 2014 research criteria<sup>45</sup> were:  
24 increasing age, abdominal pain, shortness of breath, increasing parasite count, schizont proportion  
25  $>10\%$  and serum bicarbonate levels  $<18$  mmol. The model was not internally or externally validated  
26 (Table 4).

## 27 28 29 30 31 32 33 **Discussion:**

34  
35  
36 In this review, we report on the various prognostic models and scores produced to predict complications,  
37 mortality and severity of malaria infection. We showed that there were two models produced to predict  
38 the risk of developing complications from malaria infection, twelve models that predict mortality from  
39 severe malaria in children, nine models that predict mortality from severe malaria in adults and four  
40 models that predict disease severity in malaria. Seventeen of these models were internally validated  
41 while only seven have been externally validated. There is no published evidence that any of these  
42 models are routinely used in clinical settings.

43  
44  
45  
46  
47 The models identified in this review that were used to predict mortality in children with severe malaria  
48 have similar clinical predictors. All the models had neurologic dysfunction based on either the Glasgow  
49 coma score, impaired consciousness, altered mental status, convulsions, decerebration or coma as a  
50 predictor. Similarly, in adults, all the models predicting mortality also had neurologic dysfunction as a  
51 predictor. Microvascular obstruction in capillaries of the brain due to direct sequestration of red blood  
52 cells infected with the malaria parasite could lead to tissue hypoxia<sup>46</sup>. The effects of this sequestration  
53 and its sequelae in the brain can be directly visualised in both adults and children as retinopathy<sup>16 46-48</sup>.  
54 This leads to varied results with increased intracranial pressure more pronounced in children than in  
55  
56  
57  
58  
59  
60

1  
2  
3 adults <sup>46</sup>. With the increased oxygen demand associated with brain hypoxia and raised intracranial  
4 pressure, coma and brain dysfunction could therefore become an important predictor of mortality.  
5

6  
7 In children, half of the models predicting mortality had hypoglycaemia as a predictor <sup>21-23 27 28 32</sup>.  
8 Hypoglycaemia is usually implicated as a complication of severe malaria infection. This association  
9 has been said to be multifactorial <sup>49</sup>. Proposed mechanisms for this association include: increased  
10 glucose use by the malaria parasites in the red blood cells, inhibition of gluconeogenesis by the cascade  
11 of cytokines released due to infection and prolonged starvation and fasting especially in severely ill  
12 children further compounds the problem <sup>49 50</sup>. Considering that glucose is the primary source for organs  
13 like the brain which is likely suffering from the above highlighted effects of microvascular obstruction  
14 and sequestration; depleted glucose sources could lead to neurologic dysfunction including seizures,  
15 deepening comas and hence death. As above, any factor that significantly affects neurologic dysfunction  
16 could be highly predictive of mortality or disease severity in patients.  
17  
18  
19  
20  
21  
22

23 Half of the models in children predicting mortality had respiratory distress (including deep breathing  
24 and subcostal indrawing) as a predictor <sup>16 20 23 28 31</sup>. Meanwhile six out of the nine models in adults had  
25 respiratory failure as a clinical predictor of mortality <sup>19 24 26 41</sup>. The incidence of respiratory distress in  
26 severe malaria is quite common as it occurs in about 40% of children with severe falciparum malaria  
27 and in 25% of adults <sup>51</sup>. It results from acute respiratory distress syndrome (ARDS); metabolic acidosis;  
28 fluid overload possibly resulting from increased inflammatory related capillary permeability and  
29 endothelial damage <sup>8 51</sup>; and aspiration pneumonia which could lead to sepsis <sup>8</sup> – a common association  
30 with severe malaria. The high mortality rates (up to 87% in some cases) associated with respiratory  
31 failure like in ARDS <sup>52</sup> could explain the predictive significance of respiratory distress in predicting  
32 mortality in malaria infection. Respiratory failure usually leads to hypoxia and a high probability of  
33 acute mortality in patients.  
34  
35  
36  
37  
38  
39  
40

41 Acidosis was also a prominent predictor of mortality in most of the models predicting mortality. It was  
42 present in three of the models predicting mortality in children <sup>28 30 32</sup> and five models predicting mortality  
43 in adults <sup>17 18 26 29 41</sup>. Acidosis usually results from underlying pathologies like respiratory distress, renal  
44 failure and shock. These three variables were also common variables in the models predicting mortality  
45 in both children and adults identified in this review. Renal failure expressed in these models either as  
46 acute renal failure, oligoanuria or estimates of the kidney function using serum urea and creatinine <sup>17 19</sup>  
47 <sup>24-26 30 32 41</sup>; is due to acute tubular necrosis that occurs in severe malaria infection as a direct result of  
48 microvascular obstruction of capillaries by infected red blood cells leading to the release of  
49 inflammatory cytokines like tumor necrosis factor <sup>53</sup>. Similarly, shock expressed either as a function of  
50 the systolic blood pressure or cold peripheries in three models in children <sup>21 31 32</sup> and likewise in two  
51 models in adults <sup>19 41</sup> could result from peripheral vasodilation which may usually occur concomitantly  
52 with sepsis and is a marker of a poor prognosis <sup>8 54 55</sup>.  
53  
54  
55  
56  
57  
58  
59  
60

1  
2  
3 From the above, factors that were predictive of disease severity and mortality seemed to be consistent  
4 amongst these studies. The factors that should therefore be considered by physicians when faced with  
5 a patient with malaria infection should include: neurologic dysfunction (coma and seizures), acidosis,  
6 hypoglycaemia and respiratory distress (Figure 2). These factors seem to be highly predictive of  
7 mortality and disease severity in most of the articles that were included in the review and should  
8 therefore be included in any future studies attempting to predict these outcomes in malaria.  
9  
10  
11  
12

13 We found evidence of external validation in only seven of the models identified in this study<sup>18 20 24 31</sup>  
14<sup>32</sup>. External validation is an important component as it determines the generalisability of the model and  
15 its potential use in different geographical regions<sup>56</sup>. As outlined above, most of the models have similar  
16 variables highlighting the fact that the predictors of complications, severity and mortality in malaria  
17 might be consistent across different settings. Emphasis could therefore be better placed in the validation  
18 of existing models and initiating their use in clinical settings to guide clinicians on prioritising patients  
19 and anticipating outcomes. Publication of the findings on the use of these models in clinical settings  
20 should also be encouraged to guide clinicians on which models work better in various settings.  
21  
22  
23  
24  
25

26 After assessment of the risk of bias of the various models, eighteen of the studies contained models that  
27 used variables that could be readily available and hence were applicable in real-life settings. However,  
28 all the models had a high risk of bias. This was primarily due to the lack of internal validation in several  
29 of the studies or the lack of use of up-to-date methods of validation. Caution should therefore be used  
30 when interpreting and using the results from the articles.  
31  
32  
33  
34

35 This review has some limitations. The search included only articles that were published in English. This  
36 could potentially lead to the exclusion of studies and models that could otherwise have been included  
37 in the review.  
38  
39

#### 40 **Conclusion:**

41  
42 Models predicting severity and mortality of malaria infection identified in this review have similar  
43 predictors. Evidence is however lacking on the generalisability of most of these models due lack of  
44 external validation. Emphasis should therefore be placed on external validation of existing models and  
45 publication of the findings of their use in clinical settings to guide clinicians on management options  
46 depending on the priorities of their patients.  
47  
48  
49

#### 50 **Abbreviations:**

51 APACHE: acute physiology and chronic health evaluation system; AUC: area under the curve;  
52 AUROC: area under the receiver operating curve; CAM: coma acidosis malaria; GCRBS: Glasgow  
53 coma scale, creatinine, respiratory rate, bilirubin and systolic BP; ICU: intensive care units; IQR:  
54 Interquartile range; LODS: Lambarene Organ Dysfunction Score; MODS: Multi-organ dysfunction  
55 score; MPI: Malaria Prognostic index; MPS: Malaria prediction score; MSA: Malaria score for adults;  
56  
57  
58  
59  
60

1  
2  
3 MSS: Malaria severity score; PEDIA: Pediatric Early Death Index for Africa; PRISM: Pediatric Risk  
4 of Mortality; PRISMA: Preferred Reporting Items for Systematic Reviews and Meta-Analysis; RCT:  
5 randomised control trial; SEQUAMAT: South East Asian Quinine Artesunate Malaria Trial; SICK:  
6 Signs of Inflammation in Children that Kill; sMODS: Simplified MODS; TNF: tumour necrosis  
7 factor; WHO: World Health Organisation  
8  
9  
10

## 11 **Declarations**

12  
13  
14 ***Ethics approval and consent to participate:*** Not applicable  
15

16  
17 ***Consent for publication:*** Not applicable  
18

19 ***Availability of data and material:*** All data relevant to the study are included in the article or uploaded  
20 as supplementary information  
21

22  
23 ***Competing interests:*** The authors declare no competing interests  
24

25 ***Funding:*** No external funding was used in carrying out this review.  
26

27 ***Authors' contributions:*** Conception: TN; independent reviews of papers: TN & BST; writing of  
28 initial draft: TN; manuscript revisions: TN & BST.  
29

30  
31 ***Acknowledgements:*** None.  
32  
33  
34  
35  
36  
37  
38  
39  
40  
41  
42  
43  
44  
45  
46  
47  
48  
49  
50  
51  
52  
53  
54  
55  
56  
57  
58  
59  
60

Table 1: Summary of articles with models predicting complications in severe malaria

| N                               | Authors             | Year | Period of participant recruitment | Country                                  | Type of study            | Sample size | Statistics used     | Name of model | Method internal of validation | Age profiles                                | Sex profiles   | Outcome predicted                                                              | Variables used                                                                                                               | Diagnostic properties                                | External validation | Use in clinical settings |
|---------------------------------|---------------------|------|-----------------------------------|------------------------------------------|--------------------------|-------------|---------------------|---------------|-------------------------------|---------------------------------------------|----------------|--------------------------------------------------------------------------------|------------------------------------------------------------------------------------------------------------------------------|------------------------------------------------------|---------------------|--------------------------|
| <b>Complications of malaria</b> |                     |      |                                   |                                          |                          |             |                     |               |                               |                                             |                |                                                                                |                                                                                                                              |                                                      |                     |                          |
| <b>Severe anaemia</b>           |                     |      |                                   |                                          |                          |             |                     |               |                               |                                             |                |                                                                                |                                                                                                                              |                                                      |                     |                          |
| 1                               | Weber <sup>15</sup> | 1997 | July – December 1994              | Gambia                                   | Cohort                   | 368         | Logistic regression | None          | None                          | Median age: 28 months (IQR: 14 – 48 months) | Females – 49%  | Paediatric development of severe anaemia in malaria (packed cell volume < 15%) | Pallor of conjunctiva and pallor of palms                                                                                    | Sensitivity of 80% and a specificity of 85%.         | None                | NE                       |
| <b>Development of sepsis</b>    |                     |      |                                   |                                          |                          |             |                     |               |                               |                                             |                |                                                                                |                                                                                                                              |                                                      |                     |                          |
| 2                               | Njim <sup>s</sup>   | 2018 | June 2003 – May 2005              | Bangladesh, India, Indonesia and Myanmar | Randomised Control Trial | 1187        | Logistic regression | None          | Bootstrapping                 | 17 – 87 years                               | Female – 24.3% | Development of clinical sepsis in adults with severe falciparum malaria        | Sex, blood urea nitrogen levels, plasma anion gap, respiratory distress, shock on admission, parasitaemia, coma and jaundice | AUC: 0.789. Sensitivity – 70.0%; specificity – 69.4% | None                | NE                       |

\* not used in present model; BCS: Blantyre coma score; NC: not clear; NE: No evidence; <sup>a</sup> diagnostic properties of original model; IQR: interquartile range; RCT: randomised control trial; ACT: artemisinin combined therapy; DRC: Democratic Republic of the Congo; BUN: blood urea nitrogen; TNF: tissue necrotic factor

Table 2: Summary of articles with models predicting mortality in paediatric severe malaria

| N | Authors | Year | Period of participant recruitment | Country | Type of study | Sample size | Statistics used | Name of model | Method internal of validation | Age profiles | Sex profiles | Outcome predicted | Variables used | Diagnostic properties | External validation | Use in clinical settings |
|---|---------|------|-----------------------------------|---------|---------------|-------------|-----------------|---------------|-------------------------------|--------------|--------------|-------------------|----------------|-----------------------|---------------------|--------------------------|
|---|---------|------|-----------------------------------|---------|---------------|-------------|-----------------|---------------|-------------------------------|--------------|--------------|-------------------|----------------|-----------------------|---------------------|--------------------------|

| Mortality |                        |      |                              |                         |                                                                |       |                      |                          |                                      |                          |                    |                                             |                                                                                                                  |                                                                                 |      |    |
|-----------|------------------------|------|------------------------------|-------------------------|----------------------------------------------------------------|-------|----------------------|--------------------------|--------------------------------------|--------------------------|--------------------|---------------------------------------------|------------------------------------------------------------------------------------------------------------------|---------------------------------------------------------------------------------|------|----|
| 1         | Jaffar <sup>21</sup>   | 1997 | 1992 – 1994                  | Gambia                  | Retrospective analysis of data from a randomised control trial | 624   | Logistic regression  | None                     | None                                 | 1 – 9.5 years            | Females – 49%      | Mortality in paediatric cerebral malaria    | Cold periphery, deep coma and hypoglycaemia                                                                      | Not done                                                                        | None | NE |
| 2         | Molyneux <sup>27</sup> | 1989 | January 1987 – June 1988     | Malawi                  | Cohort                                                         | 131   | Univariable analysis | Bedside prognostic index | None                                 | 7 months – 10 years      | Females – 55.7%    | Mortality in paediatric cerebral malaria    | Blood glucose, parasitaemia, WBC count, age, coma score, absent corneal reflexes, decerebration, convulsions     | Positive predictive value – 83%, sensitivity – 66%                              | None | NE |
| 3         | Conroy <sup>16</sup>   | 2012 | 1997 – 2009                  | Malawi                  | Cohort                                                         | 155   | Logistic regression  | None                     | Hosmer-Lemeshow goodness-of-fit test | 8 months – 14 years      | Females – 54.4%    | Mortality in patients with cerebral malaria | Age, Blantyre coma score, respiratory distress, severe anaemia, angiopoietin-1, angiopoietin-2 and sTie-2 levels | C-index of 0.79 (95% CI 0.72 – 0.84)                                            | None | NE |
| 4         | Krishna <sup>22</sup>  | 1994 | 1988 – 1989                  | Gambia                  | Cohort study                                                   | 115   | Logistic regression  | None                     | Wald statistic and ROC analysis      | 18 months – 12 years     | NC                 | Mortality in paediatric severe malaria      | Coma score, whole blood lactate/glucose ratio, TNF level                                                         | Wald statistic: coma score (4.5), lactate/glucose ratio (8.36), TNF level (6.5) | None | NE |
| 5         | Marsh <sup>23</sup>    | 1995 | May 1989 – November 1991     | Kenya                   | Cohort                                                         | 1844  | Logistic regression  | None                     | None                                 | Mean: 26 months          | NC                 | Mortality in children with severe malaria   | Impaired consciousness, respiratory distress, hypoglycemia, and jaundice                                         | Predicted 92.2% of deaths                                                       | None | NE |
| 6         | Newton <sup>28</sup>   | 2005 | January 2001 – December 2003 | Malawi, Kenya and Ghana | Cohort                                                         | 14605 | Linear regression    | None                     | AUROC                                | Mean age: 32 – 36 months | Females – 53 – 55% | Mortality in paediatric severe falciparum   | Deep breathing, Blantyre Coma Score, inability to sit, weight-                                                   | C-statistic 0.83 – 0.88 in the three sites: Blantyre (0.88), Kilifi             | None | NE |

|    |                            |      |                                  |                                                                          |                        |       |                     |                                                             |                                                 |                                     |                     |                                                      |                                                                                                                                                                                                                                                                   |                                                                                                      |      |    |
|----|----------------------------|------|----------------------------------|--------------------------------------------------------------------------|------------------------|-------|---------------------|-------------------------------------------------------------|-------------------------------------------------|-------------------------------------|---------------------|------------------------------------------------------|-------------------------------------------------------------------------------------------------------------------------------------------------------------------------------------------------------------------------------------------------------------------|------------------------------------------------------------------------------------------------------|------|----|
|    |                            |      |                                  |                                                                          |                        |       |                     |                                                             |                                                 |                                     |                     | malaria                                              | for-age Z score, hypoglycaemia, base excess and lactate concentration                                                                                                                                                                                             | (0.87) and Kumasi (0.83)                                                                             |      |    |
| 7  | Gérardin <sup>32</sup>     | 2006 | October 1, 1997 – March 31, 1999 | Senegal                                                                  | Cohort                 | 311   | Logistic regression | PRISM (Pediatric Risk of Mortality) AUC: 0.92 <sup>40</sup> | Hosmer-Lemeshow chi-square test                 | Median: 8 years (IQR: 5 – 11 years) | Females – 40.5%     | Mortality in children with falciparum malaria        | Systolic blood pressure, temperature, mental status, heart rate, dilatation of pupils, pH, total CO <sub>2</sub> , PCO <sub>2</sub> , arterial PaO <sub>2</sub> , serum glucose, potassium, urea, creatinine, white blood cells, prothrombin time, platelet count | AUROC for acute malaria: 0.89 (95% CI: 0.85 – 0.92) and 0.86 (95% CI: 0.81– 0.90) for severe malaria | Yes  | NE |
| 8  | Helbok <sup>20</sup>       | 2009 | December 2000 – May 2005         | Gambia, Malawi, Kenya, Ghana, and Gabon                                  | Cohort                 | 23890 | Logistic regression | LODS (Lambaréné Organ Dysfunction Score)                    | Internal validation using Bonferroni correction | Mean: 30 – 38 months                | Females – 41% – 47% | Mortality in children with severe falciparum malaria | Coma, prostration and deep breathing                                                                                                                                                                                                                              | AUROC: 80 0.80 (0.79 – 0.82)                                                                         | Yes  | NE |
| 9  | von Seidlein <sup>30</sup> | 2012 | 2005 - 2010                      | Gambia, Mozambique, Nigeria, Rwanda, Kenya, DRC, Tanzania, Ghana, Uganda | Retrospective analysis | 5426  | Logistic regression | None                                                        | ROC analysis                                    | Median: 2.8 years (1.7, 4.3)        | NC                  | Mortality in paediatric severe falciparum malaria    | Base deficit, coma, convulsions, BUN and chronic illness                                                                                                                                                                                                          | AUROC: 0.85 (95% CI: 0.83 - 0.87)                                                                    | None | NE |
| 10 | Conroy <sup>31</sup>       | 2015 | NC                               | Uganda                                                                   | Cohort                 | 1589  | Logistic regression | SICK (Signs of Inflammation in Children)                    | Hosmer-Lemeshow goodness of fit                 | NC                                  | Females – 54.3%     | Mortality in malaria                                 | Altered consciousness, temperature, heart rate, respiratory                                                                                                                                                                                                       | AUROC – 0.846                                                                                        | Yes  | NE |





|   |                         |      |                             |                                          |                                                      |      |                                                                                     |                                   |                                                                   |               |                 |                                                            |                                                                                                                |                                                                                                 |                   |    |
|---|-------------------------|------|-----------------------------|------------------------------------------|------------------------------------------------------|------|-------------------------------------------------------------------------------------|-----------------------------------|-------------------------------------------------------------------|---------------|-----------------|------------------------------------------------------------|----------------------------------------------------------------------------------------------------------------|-------------------------------------------------------------------------------------------------|-------------------|----|
|   |                         |      |                             |                                          |                                                      |      | II score use clinical judgement and physiologic relationships to assign weightings) |                                   |                                                                   |               |                 | falciparum malaria                                         | haematocrit, WBC count, creatinine, sodium, potassium and Glasgow coma score                                   |                                                                                                 |                   |    |
| 2 | Dondorp <sup>17</sup>   | 2004 | NC                          | Vietnam                                  | Cohort                                               | 268  | Logistic regression                                                                 | None                              | Hosmer-Lemeshow goodness-of-fit test                              | 15 – 79 years | Females – 19%   | Mortality in adults with severe falciparum malaria         | Plasma lactate, plasma strong anion gap and plasma creatinine                                                  | AUROC: 0.81                                                                                     | None              | NE |
| 3 | Mishra <sup>24</sup>    | 2007 | NC                          | India                                    | Cohort                                               | 212  | Linear regression                                                                   | MSA (Malaria score for adults)    | Not done                                                          | NC            | NC              | Mortality in adults with severe malaria                    | severe anaemia, acute renal failure, respiratory distress, cerebral malaria                                    | Sensitivity : 89.9%, specificity : 70.6%, positive predictive value: 94.1% with cut-off of 5/10 | Yes <sup>43</sup> | NE |
|   |                         |      |                             |                                          |                                                      |      |                                                                                     | MPS (Malaria prediction score)    | Not done                                                          | NC            | NC              | Mortality in severe malaria                                | Age, serum creatinine level, haemoglobin level, cerebral malaria, presence of a pregnancy, use of a ventilator | NE                                                                                              | Yes <sup>43</sup> | NE |
| 4 | Hanson <sup>18</sup>    | 2010 | June 2003 – May 2005        | Bangladesh, India, Indonesia and Myanmar | Retrospective analysis of a randomised control trial | 789  | Logistic regression                                                                 | CAM (coma acidosis malaria) score | Hosmer-Lemeshow goodness-of-fit                                   | NC            | NC              | Mortality in adults with severe malaria                    | Coma and acidosis (base deficit)                                                                               | AUROC: 0.81 (95% CI: 0.77 – 0.84)                                                               | Yes <sup>59</sup> | NE |
| 5 | Mohapatra <sup>26</sup> | 2009 | January 200 – December 2004 | India                                    | Cohort study                                         | 2089 | Logistic regression                                                                 | MSS (Malaria severity score)      | Hosmer-Lemeshow goodness-of-fit (internal validation by splitting | 18 – 71 years | Females – 34.6% | Mortality in adult patients with severe falciparum malaria | neurologic, renal, haematologic, hepatic, respiratory, cardiovascular, and metabolic organ systems             | AUROC: 0.9                                                                                      | None              | NE |

|   |                         |      |             |                                                   |                                              |      |                     |                                                                            |                                                              |                         |                |                                                                            |                                                                                                               |                                                                                                                  |      |    |
|---|-------------------------|------|-------------|---------------------------------------------------|----------------------------------------------|------|---------------------|----------------------------------------------------------------------------|--------------------------------------------------------------|-------------------------|----------------|----------------------------------------------------------------------------|---------------------------------------------------------------------------------------------------------------|------------------------------------------------------------------------------------------------------------------|------|----|
|   |                         |      |             |                                                   |                                              |      |                     |                                                                            | data – 2089 vs 509)                                          |                         |                |                                                                            |                                                                                                               |                                                                                                                  |      |    |
| 6 | Newton <sup>29</sup>    | 2013 | 1986 – 2002 | Thailand                                          | Retrospective analysis                       | 988  | Logistic regression | MPI (Malaria prognostic index)                                             | ROC curve analysis and internal validation by data splitting | 15 – 74 years           | Females – 43%  | Mortality in adult severe falciparum malaria                               | Glasgow coma scale, parasitaemia, plasma lactate, serum bilirubin, pigmented parasites and treatment with ACT | AUROC: 0.97                                                                                                      | None | NE |
| 7 | Mohapatra <sup>25</sup> | 2014 | NC          | India                                             | Cohort                                       | 112  | NC                  | GCBRS (GCS, creatinine, respiratory rate, bilirubin and systolic BP) score | NC                                                           | Mean: 35.8 ± 15.1 years | Females – 16.1 | Mortality in severe falciparum malaria                                     | Cerebral malaria, renal failure, respiratory distress, jaundice and shock                                     | Sensitivity : 85.3%. Specificity : 95.6%                                                                         | None | NE |
| 8 | Hanson <sup>19</sup>    | 2014 | 1996 – 2013 | Bangladesh, India, Indonesia, Vietnam and Myanmar | Randomised control trials and cohort studies | 1801 | Logistic regression | None                                                                       | Hosmer-Lemeshow goodness-of-fit                              | 21 – 45                 | Females – 24.4 | 48-hour survival and survival to discharge in patients with severe malaria | Shock, oligo-anuria, dysglycaemia, respiratory rate, Glasgow Coma Score and absence of fever                  | PPV for 48 hour-survival: 99.4% (95% CI 97.8 – 99.9). PPV for survival to discharge: 96.9% (95% CI: 94.3 – 98.5) | None | NE |

\* not used in present model; BCS: Blantyre coma score; NC: not clear; NE: No evidence; <sup>a</sup> diagnostic properties of original model; IQR: interquartile range; RCT: randomised control trial; ACT: artemisinin combined therapy; DRC: Democratic Republic of the Congo; BUN: blood urea nitrogen; TNF: tissue necrotic factor

**Table 4: Summary of articles with models predicting severity of malaria infection**

| N                          | Authors              | Year | Period of participant recruitment  | Country  | Type of study | Sample size | Statistics used   | Name of model                                      | Method internal of validation | Age profiles            | Sex profiles   | Outcome predicted                                                                       | Variables used                                                                                                                                                                       | Diagnostic properties                                                  | External validation | Use in clinical settings |
|----------------------------|----------------------|------|------------------------------------|----------|---------------|-------------|-------------------|----------------------------------------------------|-------------------------------|-------------------------|----------------|-----------------------------------------------------------------------------------------|--------------------------------------------------------------------------------------------------------------------------------------------------------------------------------------|------------------------------------------------------------------------|---------------------|--------------------------|
| <b>Severity of disease</b> |                      |      |                                    |          |               |             |                   |                                                    |                               |                         |                |                                                                                         |                                                                                                                                                                                      |                                                                        |                     |                          |
| 1                          | Helbok <sup>35</sup> | 2003 | October 1, 2001 – January 30, 2002 | Thailand | Cohort        | 22          | NC                | MODS (Multi-organ dysfunction score) <sup>44</sup> | None                          | 16 – 41 years           | Female – 41.8% | Severity of disease in adult patients with uncomplicated falciparum malaria             | Ten organ systems: (heart, blood vessel, blood, respiratory system, metabolism, gastrointestinal system, liver, kidney and urinary tract, immune system, and central nervous system) | None                                                                   | None                | NE                       |
| 2                          | Helbok <sup>34</sup> | 2005 | October 1, 2001 – July 30, 2002    | Thailand | Cohort        | 29          | Survival analysis | MODS <sup>44</sup>                                 | None                          | Mean age: 27.1 (± 10.6) | Female – 27.6% | Severity of disease in adult patients with severe falciparum malaria                    | Ten organ systems: (heart, blood vessel, blood, respiratory system, metabolism, gastrointestinal system, liver, kidney and urinary tract, immune system, and central nervous system) | None                                                                   | None                | NE                       |
| 3                          | Helbok <sup>36</sup> | 2006 | August 2003 – May 2005             | Gabon    | Cohort        | 485         | Survival analysis | Simplified MODS <sup>35</sup>                      | ROC analysis                  | 4 months – 169 months   | Females – 49%  | Severity of disease and disability in children with severe falciparum malaria infection | Ten organ systems: (heart, blood vessel, blood, respiratory system, metabolism, gastrointestinal system, liver,                                                                      | AUC to predict prolonged disease (>48 hours unable to walk): 0.92 (95% | None                | NE                       |

|   |                     |      |                           |          |        |                                              |                     |      |      |                         |                |                                                                                                 |                                                                                                                        |                 |      |    |
|---|---------------------|------|---------------------------|----------|--------|----------------------------------------------|---------------------|------|------|-------------------------|----------------|-------------------------------------------------------------------------------------------------|------------------------------------------------------------------------------------------------------------------------|-----------------|------|----|
|   |                     |      |                           |          |        |                                              |                     |      |      |                         |                |                                                                                                 | kidney and urinary tract, immune system, and central nervous system)                                                   | CI, 0.89–0.95). |      |    |
| 4 | Grigg <sup>37</sup> | 2018 | October 2012 – April 2016 | Malaysia | Cohort | 481 patients with <i>Plasmodium knowlesi</i> | Logistic regression | None | None | 33 years (IQR: 21 – 49) | Female – 43.2% | Severity of <i>Plasmodium knowlesi</i> infection using WHO 2014 research criteria <sup>45</sup> | Age >45, abdominal pain, shortness of breath, increased parasite count, schizont proportion >10%, Bicarbonate <18 mmol | None            | None | NE |

\* not used in present model; BCS: Blantyre coma score; NC: not clear; NE: No evidence; <sup>a</sup> diagnostic properties of original model; IQR: interquartile range; RCT: randomised control trial; ACT: artemisinin combined therapy; DRC: Democratic Republic of the Congo; BUN: blood urea nitrogen; TNF: tissue necrotic factor; WHO: World Health Organisation; IQR: Interquartile range

## References

1. White NJ, Pukrittayakamee S, Hien TT, et al. Malaria. *Lancet* 2014;383(9918):723-35. doi: 10.1016/S0140-6736(13)60024-0 [published Online First: 2013/08/21]
2. Tanner M, Greenwood B, Whitty CJ, et al. Malaria eradication and elimination: views on how to translate a vision into reality. *BMC Med* 2015;13:167. doi: 10.1186/s12916-015-0384-6 [published Online First: 2015/07/26]
3. World Health Organisation. Achieving the malaria MDG target: reversing the incidence of malaria 2000-2015. Geneva, 2015.
4. World Health Organisation. Malaria 2019 [Available from: <https://www.who.int/news-room/fact-sheets/detail/malaria> accessed 04/09/2019.
5. World Health Organisation. World Malaria Report. Geneva: World Health Organisation, 2016.
6. A single agenda needed for malaria. *Lancet Infect Dis* 2003;3(6):317. [published Online First: 2003/06/05]
7. Day N, Dondorp AM. The management of patients with severe malaria. *Am J Trop Med Hyg* 2007;77(6 Suppl):29-35. [published Online First: 2008/01/31]
8. Njim T, Dondorp A, Mukaka M, et al. Identifying risk factors for the development of sepsis during adult severe malaria. *Malaria Journal* 2018;17(1):278-78. doi: 10.1186/s12936-018-2430-2
9. Perel P, Edwards P, Wentz R, et al. Systematic review of prognostic models in traumatic brain injury. *BMC Med Inform Decis Mak* 2006;6:38. doi: 10.1186/1472-6947-6-38
10. Vogenberg FR. Predictive and prognostic models: implications for healthcare decision-making in a modern recession. *Am Health Drug Benefits* 2009;2(6):218-22.
11. Cook NR. Statistical evaluation of prognostic versus diagnostic models: beyond the ROC curve. *Clin Chem* 2008;54(1):17-23. doi: 10.1373/clinchem.2007.096529
12. Mehdi T, Bashardoost N, Ahmadi M. Kernel Smoothing For ROC Curve And Estimation For Thyroid Stimulating Hormone. *International Journal of Public Health Research* 2011(Special issue 2011):239-42.
13. Moons KGM, Wolff RF, Riley RD, et al. PROBAST: A Tool to Assess Risk of Bias and Applicability of Prediction Model Studies: Explanation and Elaboration. *Ann Intern Med* 2019;170(1):W1-W33. doi: 10.7326/M18-1377 [published Online First: 2019/01/01]
14. Wolff RF, Moons KGM, Riley RD, et al. PROBAST: A Tool to Assess the Risk of Bias and Applicability of Prediction Model Studies. *Ann Intern Med* 2019;170(1):51-58. doi: 10.7326/M18-1376 [published Online First: 2019/01/01]
15. Weber MW, Kellingray SD, Palmer A, et al. Pallor as a clinical sign of severe anaemia in children: an investigation in the Gambia. *Bulletin Of The World Health Organization* 1997;75 Suppl 1:113-18.
16. Conroy AL, Glover SJ, Hawkes M, et al. Angiopoietin-2 levels are associated with retinopathy and predict mortality in Malawian children with cerebral malaria: a retrospective case-control study\*. *Critical Care Medicine* 2012;40(3):952-59. doi: 10.1097/CCM.0b013e3182373157
17. Dondorp AM, Chau TTH, Phu NH, et al. Unidentified acids of strong prognostic significance in severe malaria. *Critical Care Medicine* 2004;32(8):1683-88.
18. Hanson J, Lee SJ, Mohanty S, et al. A simple score to predict the outcome of severe malaria in adults. *Clin Infect Dis* 2010;50(5):679-85. doi: 10.1086/649928 [published Online First: 2010/01/29]
19. Hanson J, Lee SJ, Mohanty S, et al. Rapid clinical assessment to facilitate the triage of adults with falciparum malaria, a retrospective analysis. *PLoS One* 2014;9(1):e87020. doi: 10.1371/journal.pone.0087020 [published Online First: 2014/02/04]

- 1
  - 2
  - 3
  - 4
  - 5
  - 6
  - 7
  - 8
  - 9
  - 10
  - 11
  - 12
  - 13
  - 14
  - 15
  - 16
  - 17
  - 18
  - 19
  - 20
  - 21
  - 22
  - 23
  - 24
  - 25
  - 26
  - 27
  - 28
  - 29
  - 30
  - 31
  - 32
  - 33
  - 34
  - 35
  - 36
  - 37
  - 38
  - 39
  - 40
  - 41
  - 42
  - 43
  - 44
  - 45
  - 46
  - 47
  - 48
  - 49
  - 50
  - 51
  - 52
  - 53
  - 54
  - 55
  - 56
  - 57
  - 58
  - 59
  - 60
20. Helbok R, Kendjo E, Issifou S, et al. The Lambarene Organ Dysfunction Score (LODS) is a simple clinical predictor of fatal malaria in African children. *J Infect Dis* 2009;200(12):1834-41. doi: 10.1086/648409 [published Online First: 2009/11/17]
21. Jaffar S, Van Hensbroek MB, Palmer A, et al. Predictors of a fatal outcome following childhood cerebral malaria. *Am J Trop Med Hyg* 1997;57(1):20-4. [published Online First: 1997/07/01]
22. Krishna S, Waller DW, ter Kuile F, et al. Lactic acidosis and hypoglycaemia in children with severe malaria: pathophysiological and prognostic significance. *Trans R Soc Trop Med Hyg* 1994;88(1):67-73. [published Online First: 1994/01/01]
23. Marsh K, Forster D, Waruiru C, et al. Indicators of life-threatening malaria in African children. *N Engl J Med* 1995;332(21):1399-404. doi: 10.1056/NEJM199505253322102 [published Online First: 1995/05/25]
24. Mishra SK, Panigrahi P, Mishra R, et al. Prediction of outcome in adults with severe falciparum malaria: a new scoring system. *Malaria Journal* 2007;6:24-24.
25. Mohapatra BN, Jangid SK, Mohanty R. GCRBS score: a new scoring system for predicting outcome in severe falciparum malaria. *Journal Of The Association Of Physicians Of India* 2014;62
26. Mohapatra MK, Das SP. The malaria severity score: a method for severity assessment and risk prediction of hospital mortality for falciparum malaria in adults. *The Journal Of The Association Of Physicians Of India* 2009;57:119-26.
27. Molyneux ME, Taylor TE, Wirima JJ, et al. Clinical features and prognostic indicators in paediatric cerebral malaria: a study of 131 comatose Malawian children. *Q J Med* 1989;71(265):441-59. [published Online First: 1989/05/01]
28. Newton CRJC, Valim C, Krishna S, et al. The prognostic value of measures of acid/base balance in pediatric falciparum malaria, compared with other clinical and laboratory parameters. *Clinical Infectious Diseases: An Official Publication Of The Infectious Diseases Society Of America* 2005;41(7):948-57.
29. Newton PN, Stepniewska K, Dondorp A, et al. Prognostic indicators in adults hospitalized with falciparum malaria in Western Thailand. *Malar J* 2013;12:229. doi: 10.1186/1475-2875-12-229 [published Online First: 2013/07/09]
30. von Seidlein L, Olaosebikan R, Hendriksen IC, et al. Predicting the clinical outcome of severe falciparum malaria in african children: findings from a large randomized trial. *Clin Infect Dis* 2012;54(8):1080-90. doi: 10.1093/cid/cis034 [published Online First: 2012/03/14]
31. Conroy AL, Hawkes M, Hayford K, et al. Prospective validation of pediatric disease severity scores to predict mortality in Ugandan children presenting with malaria and non-malaria febrile illness. *Critical Care (London, England)* 2015;19:47-47. doi: 10.1186/s13054-015-0773-4
32. Gérardin P, Rogier C, Leteurtre S, et al. Evaluation of Pediatric Risk of Mortality (PRISM) scoring in African children with falciparum malaria. *Pediatric Critical Care Medicine: A Journal Of The Society Of Critical Care Medicine And The World Federation Of Pediatric Intensive And Critical Care Societies* 2006;7(1):45-47.
33. Khoo KL, Tan WL, Eng P, et al. Malaria requiring intensive care. *Annals Of The Academy Of Medicine, Singapore* 1998;27(3):353-57.
34. Helbok R, Dent W, Nacher M, et al. The use of the multi-organ-dysfunction score to discriminate different levels of severity in severe and complicated Plasmodium falciparum malaria. *Am J Trop Med Hyg* 2005;72(2):150-4. [published Online First: 2005/03/03]
35. Helbok R, Dent W, Nacher M, et al. Use of the multi-organ dysfunction score as a tool to discriminate different levels of severity in uncomplicated Plasmodium falciparum malaria. *Am J Trop Med Hyg* 2003;68(3):372-5. [published Online First: 2003/04/11]
36. Helbok R, Issifou S, Matsiegui PB, et al. Simplified multi-organ dysfunction score predicts disability in African children with Plasmodium falciparum malaria. *Am J Trop Med Hyg* 2006;75(3):443-7. [published Online First: 2006/09/14]

37. Grigg MJ, William T, Barber BE, et al. Age-Related Clinical Spectrum of Plasmodium knowlesi Malaria and Predictors of Severity. *Clinical Infectious Diseases* 2018;67(3):350-59. doi: 10.1093/cid/ciy065
38. Kumar N, Thomas N, Singhal D, et al. Triage score for severity of illness. *Indian Pediatr* 2003;40(3):204-10. [published Online First: 2003/03/27]
39. Berkley JA, Ross A, Mwangi I, et al. Prognostic indicators of early and late death in children admitted to district hospital in Kenya: cohort study. *BMJ* 2003;326(7385):361. [published Online First: 2003/02/15]
40. Pollack MM, Ruttimann UE, Getson PR. Pediatric risk of mortality (PRISM) score. *Crit Care Med* 1988;16(11):1110-6. [published Online First: 1988/11/01]
41. Wilairatana P, Looareesuwan S. APACHE II scoring for predicting outcome in cerebral malaria. *The Journal Of Tropical Medicine And Hygiene* 1995;98(4):256-60.
42. Knaus WA, Draper EA, Wagner DP, et al. APACHE II: a severity of disease classification system. *Crit Care Med* 1985;13(10):818-29. [published Online First: 1985/10/01]
43. Santos LC, Abreu CF, Xerinda SM, et al. Severe imported malaria in an intensive care unit: a review of 59 cases. *Malaria Journal* 2012;11:96-96. doi: 10.1186/1475-2875-11-96
44. Weiler T, Baldering HJ, Heinrichs W, et al. [Quality assurance in intensive care medicine. Results of a multicenter study in Germany]. *Anesthesiol Intensivmed Notfallmed Schmerzther* 1997;32(6):372-5. doi: 10.1055/s-2007-995073 [published Online First: 1997/06/01]
45. World Health Organisation. Severe malaria. *Trop Med Int Health* 2014;19 Suppl 1:7-131. doi: 10.1111/tmi.12313\_2 [published Online First: 2014/09/13]
46. Plewes K, Turner GDH, Dondorp AM. Pathophysiology, clinical presentation, and treatment of coma and acute kidney injury complicating falciparum malaria. *Curr Opin Infect Dis* 2018;31(1):69-77. doi: 10.1097/QCO.0000000000000419 [published Online First: 2017/12/06]
47. White VA, Lewallen S, Beare N, et al. Correlation of retinal haemorrhages with brain haemorrhages in children dying of cerebral malaria in Malawi. *Transactions Of The Royal Society Of Tropical Medicine And Hygiene* 2001;95(6):618-21.
48. Lewallen S, Bronzan RN, Beare NA, et al. Using malarial retinopathy to improve the classification of children with cerebral malaria. *Transactions Of The Royal Society Of Tropical Medicine And Hygiene* 2008;102(11):1089-94. doi: 10.1016/j.trstmh.2008.06.014
49. Ogetii GN, Akech S, Jemutai J, et al. Hypoglycaemia in severe malaria, clinical associations and relationship to quinine dosage. *BMC Infect Dis* 2010;10:334. doi: 10.1186/1471-2334-10-334 [published Online First: 2010/11/26]
50. Thien HV, Kager PA, Sauerwein HP. Hypoglycemia in falciparum malaria: is fasting an unrecognized and insufficiently emphasized risk factor? *Trends Parasitol* 2006;22(9):410-5. doi: 10.1016/j.pt.2006.06.014 [published Online First: 2006/07/15]
51. Taylor WRJ, Hanson J, Turner GDH, et al. Respiratory manifestations of malaria. *Chest* 2012;142(2):492-505. doi: 10.1378/chest.11-2655 [published Online First: 2012/08/09]
52. Maca J, Jor O, Holub M, et al. Past and Present ARDS Mortality Rates: A Systematic Review. *Respir Care* 2017;62(1):113-22. doi: 10.4187/respcare.04716 [published Online First: 2016/11/03]
53. Duvic C, Rabar D, Didelot F, et al. [Acute renal failure during severe malaria: physiopathology and therapeutic management. Apropos of 2 cases]. *Med Trop (Mars)* 2000;60(3):267-70. [published Online First: 2001/03/22]
54. Bruneel F, Gachot B, Timsit JF, et al. Shock complicating severe falciparum malaria in European adults. *Intensive Care Med* 1997;23(6):698-701. [published Online First: 1997/06/01]
55. Kuethe F, Pfeifer R, Rummeler S, et al. Treatment of a patient with shock complicating severe falciparum malaria: a case report. *Cases J* 2009;2:6644. doi: 10.1186/1757-1626-0002-0000006644 [published Online First: 2010/02/26]



- 1  
2  
3 56. Altman DG, Vergouwe Y, Royston P, et al. Prognosis and prognostic research: validating a  
4 prognostic model. *BMJ* 2009;338:b605. doi: 10.1136/bmj.b605 [published Online First:  
5 2009/05/30]  
6  
7 57. Taylor T, Olola C, Valim C, et al. Standardized data collection for multi-center clinical studies of  
8 severe malaria in African children: establishing the SMAC network. *Trans R Soc Trop Med*  
9 *Hyg* 2006;100(7):615-22. doi: 10.1016/j.trstmh.2005.09.021 [published Online First:  
10 2006/03/23]  
11  
12 58. Seneff M, Knaus WA. Predicting patient outcome from intensive care: A guide to APACHE, MPM,  
13 SAPS, PRISM, and other prognostic scoring systems. *Journal of Intensive Care Medicine*  
14 1990;5(1):33-52.  
15  
16 59. Aggarwal HK, Jain D, Rao A, et al. Role of Coma Acidosis Malaria Score in Patients with Severe  
17 Malaria among Indian Population: a Tertiary Care Center Experience. *Eurasian J Med*  
18 2017;49(1):30-35. doi: 10.5152/eurasianjmed.2017.16069 [published Online First:  
19 2017/04/19]  
20  
21  
22

### 23 **Figures Legends:**

24  
25 **Figure 1: Flow chart showing reasons for exclusion of various studies from the review**

26  
27  
28 **Figure 2: Predictive factors of disease severity and mortality in malaria infection**



1  
2  
3  
4  
5  
6  
7  
8  
9  
10  
11  
12  
13  
14  
15  
16  
17  
18  
19  
20  
21  
22  
23  
24  
25  
26  
27  
28  
29  
30  
31  
32  
33  
34  
35  
36  
37  
38  
39  
40  
41  
42  
43  
44  
45  
46  
47  
48  
49  
50  
51  
52  
53  
54  
55  
56  
57  
58  
59  
60

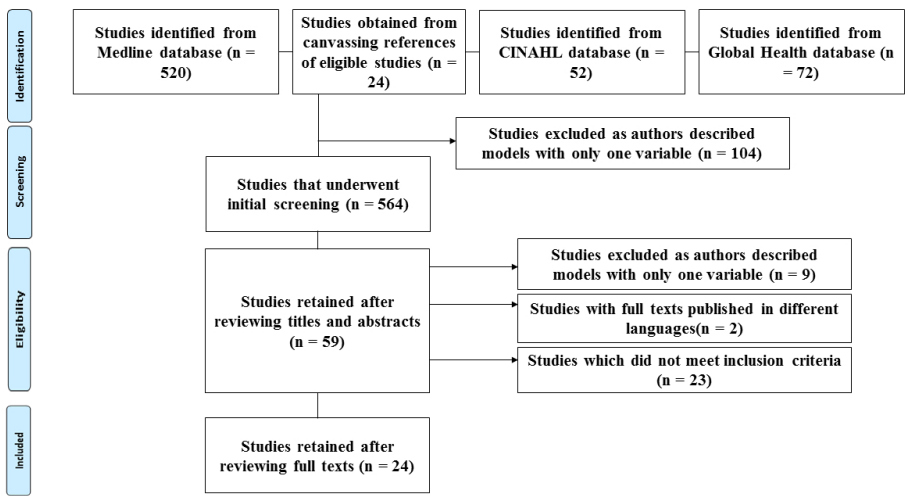

Flow chart showing reasons for exclusion of various studies from the review

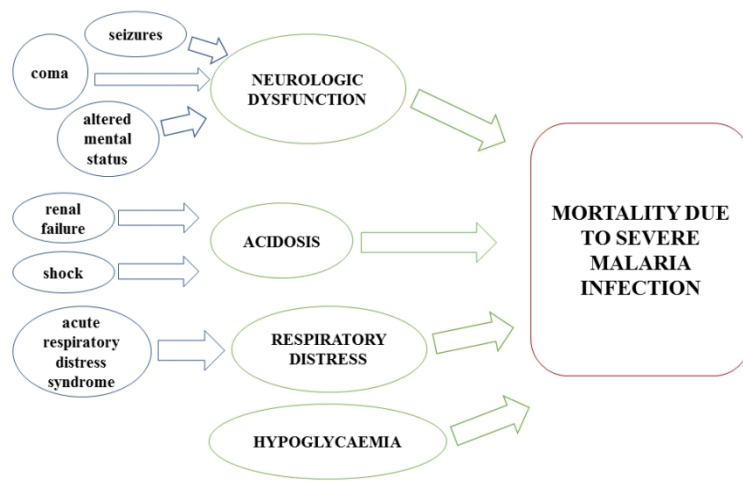

Predictive factors of disease severity and mortality in malaria infection

1  
2  
3 **Appendix 1: PRISMA checklist for systematic reviews and meta-analysis.**  
4  
5

6 **Table 1**

| Section/topic             | #  | Checklist item                                                                                                                                                                                                                                                                                              | Reported on page # |
|---------------------------|----|-------------------------------------------------------------------------------------------------------------------------------------------------------------------------------------------------------------------------------------------------------------------------------------------------------------|--------------------|
| <b>TITLE</b>              |    |                                                                                                                                                                                                                                                                                                             | 1                  |
| Title                     | 1  | Identify the report as a systematic review, meta-analysis, or both.                                                                                                                                                                                                                                         |                    |
| <b>ABSTRACT</b>           |    |                                                                                                                                                                                                                                                                                                             |                    |
| Structured summary        | 2  | Provide a structured summary including, as applicable: background; objectives; data sources; study eligibility criteria, participants, and interventions; study appraisal and synthesis methods; results; limitations; conclusions and implications of key findings; systematic review registration number. | 2                  |
| <b>INTRODUCTION</b>       |    |                                                                                                                                                                                                                                                                                                             |                    |
| Rationale                 | 3  | Describe the rationale for the review in the context of what is already known.                                                                                                                                                                                                                              | 3                  |
| Objectives                | 4  | Provide an explicit statement of questions being addressed with reference to participants, interventions, comparisons, outcomes, and study design (PICOS).                                                                                                                                                  | 3                  |
| <b>METHODS</b>            |    |                                                                                                                                                                                                                                                                                                             |                    |
| Protocol and registration | 5  | Indicate if a review protocol exists, if and where it can be accessed (e.g., Web address), and, if available, provide registration information including registration number.                                                                                                                               | 4                  |
| Eligibility criteria      | 6  | Specify study characteristics (e.g., PICOS, length of follow-up) and report characteristics (e.g., years considered, language, publication status) used as criteria for eligibility, giving rationale.                                                                                                      | 4                  |
| Information sources       | 7  | Describe all information sources (e.g., databases with dates of coverage, contact with study authors to identify additional studies) in the search and date last searched.                                                                                                                                  | 4                  |
| Search                    | 8  | Present full electronic search strategy for at least one database, including any limits used, such that it could be repeated.                                                                                                                                                                               | 4                  |
| Study selection           | 9  | State the process for selecting studies (i.e., screening, eligibility, included in systematic review, and, if applicable, included in the meta-analysis).                                                                                                                                                   | 4                  |
| Data collection process   | 10 | Describe method of data extraction from reports (e.g., piloted forms, independently, in duplicate) and any processes for obtaining and confirming data from investigators.                                                                                                                                  | 5                  |

|                                    |    |                                                                                                                                                                                                                        |       |
|------------------------------------|----|------------------------------------------------------------------------------------------------------------------------------------------------------------------------------------------------------------------------|-------|
| Data items                         | 11 | List and define all variables for which data were sought (e.g., PICOS, funding sources) and any assumptions and simplifications made.                                                                                  | 5     |
| Risk of bias in individual studies | 12 | Describe methods used for assessing risk of bias of individual studies (including specification of whether this was done at the study or outcome level), and how this information is to be used in any data synthesis. | 5     |
| Summary measures                   | 13 | State the principal summary measures (e.g., risk ratio, difference in means).                                                                                                                                          | NA    |
| Synthesis of results               | 14 | Describe the methods of handling data and combining results of studies, if done, including measures of consistency (e.g., $I^2$ ) for each meta-analysis.                                                              | 5     |
|                                    |    |                                                                                                                                                                                                                        |       |
| Risk of bias across studies        | 15 | Specify any assessment of risk of bias that may affect the cumulative evidence (e.g., publication bias, selective reporting within studies).                                                                           | NA    |
| Additional analyses                | 16 | Describe methods of additional analyses (e.g., sensitivity or subgroup analyses, meta-regression), if done, indicating which were pre-specified.                                                                       | NA    |
| <b>RESULTS</b>                     |    |                                                                                                                                                                                                                        |       |
| Study selection                    | 17 | Give numbers of studies screened, assessed for eligibility, and included in the review, with reasons for exclusions at each stage, ideally with a flow diagram.                                                        | 6     |
| Study characteristics              | 18 | For each study, present characteristics for which data were extracted (e.g., study size, PICOS, follow-up period) and provide the citations.                                                                           | 6 -11 |
| Risk of bias within studies        | 19 | Present data on risk of bias of each study and, if available, any outcome level assessment (see item 12).                                                                                                              | 6     |
| Results of individual studies      | 20 | For all outcomes considered (benefits or harms), present, for each study: (a) simple summary data for each intervention group (b) effect estimates and confidence intervals, ideally with a forest plot.               | NA    |
| Synthesis of results               | 21 | Present results of each meta-analysis done, including confidence intervals and measures of consistency.                                                                                                                | NA    |
| Risk of bias across studies        | 22 | Present results of any assessment of risk of bias across studies (see Item 15).                                                                                                                                        | 6     |
| Additional analysis                | 23 | Give results of additional analyses, if done (e.g., sensitivity or subgroup analyses, meta-regression [see Item 16]).                                                                                                  | NA    |
| <b>DISCUSSION</b>                  |    |                                                                                                                                                                                                                        |       |
| Summary of evidence                | 24 | Summarize the main findings including the strength of evidence for each main outcome; consider their relevance to key groups (e.g., healthcare providers, users, and policy makers).                                   | 11    |

|                |    |                                                                                                                                                               |    |
|----------------|----|---------------------------------------------------------------------------------------------------------------------------------------------------------------|----|
| Limitations    | 25 | Discuss limitations at study and outcome level (e.g., risk of bias), and at review-level (e.g., incomplete retrieval of identified research, reporting bias). | 13 |
| Conclusions    | 26 | Provide a general interpretation of the results in the context of other evidence, and implications for future research.                                       | 13 |
| <b>FUNDING</b> |    |                                                                                                                                                               |    |
| Funding        | 27 | Describe sources of funding for the systematic review and other support (e.g., supply of data); role of funders for the systematic review.                    | 14 |

**Appendix 2: Information sources**

*Electronic sources*

**Table 1a: Search strategy for Medline database**

| Searches | Search combinations | Search terms                                                                                                                                                        | Number of hits |
|----------|---------------------|---------------------------------------------------------------------------------------------------------------------------------------------------------------------|----------------|
| S1       |                     | "prognost* model" OR "predict* model" OR "Predictive Value of Tests"                                                                                                | 208,974        |
| S2       |                     | "predict* score" OR "prognos* score"                                                                                                                                | 3,884          |
| S3       | S1 OR S2            |                                                                                                                                                                     | 211,947        |
| S4       |                     | (MH "Malaria+") OR (MH "Malaria, Vivax") OR (MH "Malaria, Cerebral") OR (MH "Malaria, Falciparum+") OR (MH "Malaria, Avian")                                        | 63,536         |
| S5       |                     | "Malaria" OR "vivax malaria" OR "falciparum malaria" OR "cerebral malaria" OR "severe malaria" OR "clinical malaria" OR plasmodium OR antimalaria* OR anti-malaria* | 111,461        |
| S6       | S4 OR S5            |                                                                                                                                                                     | 111,510        |
| S7       | S3 AND S6           |                                                                                                                                                                     | 520            |

**Table 1b: Search strategy for CINAHL database**

| Searches | Search combinations | Search terms                                                                                                                                                        | Number of hits |
|----------|---------------------|---------------------------------------------------------------------------------------------------------------------------------------------------------------------|----------------|
| S1       |                     | "prognost* model" OR "predict* model" OR "Predictive Value of Tests"                                                                                                | 49,434         |
| S2       |                     | "predict* score" OR "prognos* score"                                                                                                                                | 1,041          |
| S3       | S1 OR S2            |                                                                                                                                                                     | 50,217         |
| S4       |                     | (MH "Malaria+")                                                                                                                                                     | 7,468          |
| S5       |                     | "Malaria" OR "vivax malaria" OR "falciparum malaria" OR "cerebral malaria" OR "severe malaria" OR "clinical malaria" OR plasmodium OR antimalaria* OR anti-malaria* | 10,945         |
| S6       | S4 OR S5            |                                                                                                                                                                     | 10,945         |
| S7       | S3 AND S6           |                                                                                                                                                                     | 52             |

**Table 1c: Search strategy for Global Health database**

| Searches | Search combinations | Search terms                                                                                                                                                        | Number of hits |
|----------|---------------------|---------------------------------------------------------------------------------------------------------------------------------------------------------------------|----------------|
| S1       |                     | "prognost* model" OR "predict* model" OR "Predictive Value of Tests"                                                                                                | 2,906          |
| S2       |                     | "predict* score" OR "prognos* score"                                                                                                                                | 368            |
| S3       | S1 OR S2            |                                                                                                                                                                     | 2,906          |
| S4       |                     | "Malaria" OR "vivax malaria" OR "falciparum malaria" OR "cerebral malaria" OR "severe malaria" OR "clinical malaria" OR plasmodium OR antimalaria* OR anti-malaria* | 89,436         |
| S7       | S3 AND S4           |                                                                                                                                                                     | 72             |

1  
2  
3  
4  
5  
6  
7  
8  
9  
10  
11  
12  
13  
14  
15  
16  
17  
18  
19  
20  
21  
22  
23  
24  
25  
26  
27  
28  
29  
30  
31  
32  
33  
34  
35  
36  
37  
38  
39  
40  
41  
42  
43  
44  
45  
46

**Appendix 3: The PROBAST tool used to assess the risk of bias and applicability of the studies used in the review**

| Study          | Risk of bias |            |         |          | Applicability |            |         | Overall |               |
|----------------|--------------|------------|---------|----------|---------------|------------|---------|---------|---------------|
|                | Participants | Predictors | Outcome | Analysis | Participants  | Predictors | Outcome | ROB     | Applicability |
| Conroy 2012    | +            | +          | +       | -        | +             | -          | +       | -       | -             |
| Conroy 2015*   | +            | +          | +       | -        | +             | +          | +       | -       | +             |
| Dondorp        | +            | +          | +       | -        | +             | +          | +       | -       | +             |
| Gerardin*      | +            | +          | +       | -        | +             | +          | +       | -       | +             |
| Grigg          | +            | +          | +       | -        | +             | +          | +       | -       | +             |
| Hanson 2010    | +            | +          | +       | -        | +             | +          | +       | -       | +             |
| Hanson 2014    | +            | +          | +       | -        | +             | +          | +       | -       | +             |
| Helbok 2003*   | +            | -          | +       | -        | +             | -          | +       | -       | -             |
| Helbok 2005*   | +            | -          | -       | -        | +             | -          | +       | -       | -             |
| Helbok 2006*   | +            | -          | +       | -        | +             | -          | +       | -       | -             |
| Helbok 2009    | +            | +          | +       | -        | +             | +          | +       | -       | +             |
| Jaffar         | +            | +          | +       | -        | +             | +          | +       | -       | +             |
| Krishna        | +            | +          | +       | -        | +             | -          | +       | -       | -             |
| Marsh          | +            | +          | +       | -        | +             | +          | +       | -       | +             |
| Mishra         | +            | +          | +       | -        | +             | +          | +       | -       | +             |
| Mohapatra 2009 | +            | +          | +       | -        | +             | +          | +       | -       | +             |
| Mohapatra 2014 | +            | +          | +       | -        | +             | +          | +       | -       | +             |
| Molyneux       | +            | +          | +       | -        | +             | +          | +       | -       | +             |
| Newton 2005    | +            | +          | +       | -        | +             | +          | +       | -       | +             |
| Newton 2013    | +            | +          | +       | -        | +             | +          | +       | -       | +             |
| Njim           | +            | +          | +       | -        | +             | +          | +       | -       | +             |
| von Seidlein   | +            | +          | +       | -        | +             | +          | +       | -       | +             |
| Webber         | +            | -          | -       | -        | -             | -          | -       | -       | -             |
| Wilairatana*   | +            | +          | +       | -        | +             | +          | +       | -       | +             |

\*Study was designed to externally validate existing models

1  
2  
3  
4  
5  
6  
7  
8  
9  
10  
11  
12  
13  
14  
15  
16  
17  
18  
19  
20  
21  
22  
23  
24  
25  
26  
27  
28  
29  
30  
31  
32  
33  
34  
35  
36  
37  
38  
39  
40  
41  
42  
43  
44  
45  
46  
47  
48  
49  
50  
51  
52  
53  
54  
55  
56  
57  
58  
59  
60

For peer review only



1  
2  
3 **PRISMA checklist for systematic reviews and meta-analysis.**  
4  
5  
6  
7

| Section/topic             | #  | Checklist item                                                                                                                                                                                                                                                                                              | Reported on page # |
|---------------------------|----|-------------------------------------------------------------------------------------------------------------------------------------------------------------------------------------------------------------------------------------------------------------------------------------------------------------|--------------------|
| <b>TITLE</b>              |    |                                                                                                                                                                                                                                                                                                             | 1                  |
| Title                     | 1  | Identify the report as a systematic review, meta-analysis, or both.                                                                                                                                                                                                                                         |                    |
| <b>ABSTRACT</b>           |    |                                                                                                                                                                                                                                                                                                             |                    |
| Structured summary        | 2  | Provide a structured summary including, as applicable: background; objectives; data sources; study eligibility criteria, participants, and interventions; study appraisal and synthesis methods; results; limitations; conclusions and implications of key findings; systematic review registration number. | 2                  |
| <b>INTRODUCTION</b>       |    |                                                                                                                                                                                                                                                                                                             |                    |
| Rationale                 | 3  | Describe the rationale for the review in the context of what is already known.                                                                                                                                                                                                                              | 3                  |
| Objectives                | 4  | Provide an explicit statement of questions being addressed with reference to participants, interventions, comparisons, outcomes, and study design (PICOS).                                                                                                                                                  | 3                  |
| <b>METHODS</b>            |    |                                                                                                                                                                                                                                                                                                             |                    |
| Protocol and registration | 5  | Indicate if a review protocol exists, if and where it can be accessed (e.g., Web address), and, if available, provide registration information including registration number.                                                                                                                               | 4                  |
| Eligibility criteria      | 6  | Specify study characteristics (e.g., PICOS, length of follow-up) and report characteristics (e.g., years considered, language, publication status) used as criteria for eligibility, giving rationale.                                                                                                      | 4                  |
| Information sources       | 7  | Describe all information sources (e.g., databases with dates of coverage, contact with study authors to identify additional studies) in the search and date last searched.                                                                                                                                  | 4                  |
| Search                    | 8  | Present full electronic search strategy for at least one database, including any limits used, such that it could be repeated.                                                                                                                                                                               | 4                  |
| Study selection           | 9  | State the process for selecting studies (i.e., screening, eligibility, included in systematic review, and, if applicable, included in the meta-analysis).                                                                                                                                                   | 4                  |
| Data collection process   | 10 | Describe method of data extraction from reports (e.g., piloted forms, independently, in duplicate) and any processes for obtaining and confirming data from investigators.                                                                                                                                  | 5                  |

|                                    |    |                                                                                                                                                                                                                        |       |
|------------------------------------|----|------------------------------------------------------------------------------------------------------------------------------------------------------------------------------------------------------------------------|-------|
| Data items                         | 11 | List and define all variables for which data were sought (e.g., PICOS, funding sources) and any assumptions and simplifications made.                                                                                  | 5     |
| Risk of bias in individual studies | 12 | Describe methods used for assessing risk of bias of individual studies (including specification of whether this was done at the study or outcome level), and how this information is to be used in any data synthesis. | 5     |
| Summary measures                   | 13 | State the principal summary measures (e.g., risk ratio, difference in means).                                                                                                                                          | NA    |
| Synthesis of results               | 14 | Describe the methods of handling data and combining results of studies, if done, including measures of consistency (e.g., $I^2$ ) for each meta-analysis.                                                              | 5     |
|                                    |    |                                                                                                                                                                                                                        |       |
| Risk of bias across studies        | 15 | Specify any assessment of risk of bias that may affect the cumulative evidence (e.g., publication bias, selective reporting within studies).                                                                           | NA    |
| Additional analyses                | 16 | Describe methods of additional analyses (e.g., sensitivity or subgroup analyses, meta-regression), if done, indicating which were pre-specified.                                                                       | NA    |
| <b>RESULTS</b>                     |    |                                                                                                                                                                                                                        |       |
| Study selection                    | 17 | Give numbers of studies screened, assessed for eligibility, and included in the review, with reasons for exclusions at each stage, ideally with a flow diagram.                                                        | 6     |
| Study characteristics              | 18 | For each study, present characteristics for which data were extracted (e.g., study size, PICOS, follow-up period) and provide the citations.                                                                           | 6 -11 |
| Risk of bias within studies        | 19 | Present data on risk of bias of each study and, if available, any outcome level assessment (see item 12).                                                                                                              | 6     |
| Results of individual studies      | 20 | For all outcomes considered (benefits or harms), present, for each study: (a) simple summary data for each intervention group (b) effect estimates and confidence intervals, ideally with a forest plot.               | NA    |
| Synthesis of results               | 21 | Present results of each meta-analysis done, including confidence intervals and measures of consistency.                                                                                                                | NA    |
| Risk of bias across studies        | 22 | Present results of any assessment of risk of bias across studies (see Item 15).                                                                                                                                        | 6     |
| Additional analysis                | 23 | Give results of additional analyses, if done (e.g., sensitivity or subgroup analyses, meta-regression [see Item 16]).                                                                                                  | NA    |
| <b>DISCUSSION</b>                  |    |                                                                                                                                                                                                                        |       |
| Summary of evidence                | 24 | Summarize the main findings including the strength of evidence for each main outcome; consider their relevance to key groups (e.g., healthcare providers, users, and policy makers).                                   | 11    |

1  
2  
3  
4  
5  
6  
7  
8  
9  
10  
11  
12  
13  
14  
15  
16  
17  
18  
19  
20  
21  
22  
23  
24  
25  
26  
27  
28  
29  
30  
31  
32  
33  
34  
35  
36  
37  
38  
39  
40  
41  
42  
43  
44  
45  
46

|                |    |                                                                                                                                                               |    |
|----------------|----|---------------------------------------------------------------------------------------------------------------------------------------------------------------|----|
| Limitations    | 25 | Discuss limitations at study and outcome level (e.g., risk of bias), and at review-level (e.g., incomplete retrieval of identified research, reporting bias). | 13 |
| Conclusions    | 26 | Provide a general interpretation of the results in the context of other evidence, and implications for future research.                                       | 13 |
| <b>FUNDING</b> |    |                                                                                                                                                               |    |
| Funding        | 27 | Describe sources of funding for the systematic review and other support (e.g., supply of data); role of funders for the systematic review.                    | 14 |

For peer review only

# BMJ Open

## Prognostic models for the clinical management of malaria and its complications: a systematic review

|                                 |                                                                                                   |
|---------------------------------|---------------------------------------------------------------------------------------------------|
| Journal:                        | <i>BMJ Open</i>                                                                                   |
| Manuscript ID                   | bmjopen-2019-030793.R2                                                                            |
| Article Type:                   | Original research                                                                                 |
| Date Submitted by the Author:   | 04-Nov-2019                                                                                       |
| Complete List of Authors:       | Njim, Tsi; Regional Hospital Bamenda, Surgical Department Tanyitiku, Bayee; University of Bamenda |
| <b>Primary Subject Heading</b>: | Global health                                                                                     |
| Secondary Subject Heading:      | Epidemiology, Public health                                                                       |
| Keywords:                       | malaria, prognostic model, prognostic score, mortality                                            |
|                                 |                                                                                                   |

SCHOLARONE™  
Manuscripts

1  
2  
3 **Prognostic models for the clinical management of malaria and its complications: a systematic**  
4 **review**  
5

6  
7 **Authors:** Tsi Njim<sup>1</sup> & Bayee Swiri Tanyitiku<sup>2</sup>  
8

9 **Authors' information**  
10

11 <sup>1</sup> Health and Human Development (2HD) Research Network, Douala, Cameroon  
12

13 <sup>2</sup> Faculty of Social and Management Sciences, University of Bamenda, Bamenda, Cameroon  
14

15  
16 **\* Correspondence to:**  
17

18 Dr Tsi Njim, Health and Human Development Research Network, Douala, Cameroon. Email:  
19

20 [tsinjim@gmail.com](mailto:tsinjim@gmail.com). Phone number: +237 6774422905  
21  
22

23 **Email addresses**  
24

25 TN: [tsinjim@gmail.com](mailto:tsinjim@gmail.com) ; BST: [bstanyitiku@gmail.com](mailto:bstanyitiku@gmail.com)  
26  
27  
28  
29  
30  
31  
32  
33  
34  
35  
36  
37  
38  
39  
40  
41  
42  
43  
44  
45  
46  
47  
48  
49  
50  
51  
52  
53  
54  
55  
56  
57  
58  
59  
60

## Abstract

**Objective:** Malaria infection could result in severe disease with high mortality. Prognostic models and scores predicting severity of infection, complications and mortality could help clinicians prioritise patients. We conducted a systematic review to assess the various models that have been produced to predict disease severity and mortality in patients infected with malaria.

**Design:** A systematic review.

**Data sources:** Medline, Global health and CINAHL were searched up to 04<sup>th</sup> of September 2019.

**Eligibility criteria for selecting studies:** Published articles on models which used at least 2 points (or variables) of patient data to predict disease severity; potential development of complications (including coma or cerebral malaria; shock; acidosis; severe anaemia; acute kidney injury; hypoglycaemia; respiratory failure and sepsis) and mortality in patients with malaria infection.

**Data extraction and synthesis:** Two independent reviewers extracted the data and assessed risk of bias using the Prediction model Risk Of Bias Assessment Tool (PROBAST).

**Results:** A total of 564 articles were screened and 24 articles were retained which described 27 models/scores of interests. Two of the articles described models predicting complications of malaria (severe anaemia in children and development of sepsis); fifteen articles described original models predicting mortality in severe malaria; three articles described models predicting mortality in different contexts but adapted and validated to predict mortality in malaria; and four articles described models predicting severity of the disease.

For the models predicting mortality, all the models had neurologic dysfunction as a predictor; in children, half of the models contained hypoglycaemia and respiratory failure as a predictor meanwhile, six out of the nine models in adults had respiratory failure as a clinical predictor. Acidosis, renal failure and shock were also common predictors of mortality.

Eighteen of the articles described models that could be applicable in real-life settings and all the articles had a high risk of bias due to lack of use of consistent and up-to-date methods of internal validation.

**Conclusion:** Evidence is lacking on the generalisability of most of these models due lack of external validation. Emphasis should be placed on external validation of existing models and publication of the findings of their use in clinical settings to guide clinicians on management options depending on the priorities of their patients.

**Key words:** malaria; prognostic model; prognostic score; mortality

**Prospero registration number:** CRD42019130673

## Article Summary:

### Strengths and limitations of this review:

This review is the first to comprehensively summarise the various prognostic models that have been produced to identify complications, severity and risk of mortality in patients with severe malaria.

The review covers prognostic models produced worldwide and for all the various malaria species.

The review reduced the risk of bias by using an independent review process for the screening of potential articles and the extraction of data.

Considering the wide variety of statistical methods used to generate and validate these models, there is the risk of heterogeneity in interpretation of the results.

The search was carried out in only one language which could potentially exclude some relevant studies published in different languages.

### Introduction

Malaria is a disease caused by infection with a protozoan parasite of the genus *Plasmodium*. The most relevant of these species is *Plasmodium falciparum* as it causes most deaths from the disease <sup>1</sup>.

Another species of relevance is *Plasmodium vivax* which is predominantly found in Asia and has a wider distribution <sup>2</sup>. Malaria infection can result in severe disease and is associated with a high mortality. In about 108 countries where the transmission of the disease still occurs, an estimated 435,000 people died in 2017 <sup>3 4</sup>.

The incidence of malaria cases has decreased by 41% worldwide in the past ten years, with about 17 countries in Latin America and the Middle East reporting no new cases of malaria over this period <sup>3 5</sup>. There are however concerns that the fight against malaria might be slowed down by an overemphasis on prevention over treatment <sup>6</sup>.

Treatment and clinical management of malaria is made difficult due to potential evolution of simple infections into life-threatening severe disease; the multi-organ affection of severe disease; the dilemma of when to admit to intensive care units (ICU) considering limited resources and the occurrence of concomitant sepsis infection with malaria <sup>7 8</sup>. Some of these issues can be addressed with the help of guidelines; scores or models that could help clinicians predict the occurrence of severe disease and complications in order to act appropriately.

We therefore conducted this review to systematically assess the various predictive models or scores available to guide clinicians in the management of severe malaria, whether these models have been validated and if there is any evidence that they are being successfully used in the clinical setting.

### Methods

1  
2  
3 Institutional review board approval and informed consent were not required for this systematic  
4 review. We reported our findings according to Preferred Reporting Items for Systematic Reviews and  
5 Meta-Analysis (PRISMA) guidelines (Appendix 1).  
6  
7

### 8 **Search strategy and selection criteria**

9  
10 We searched MEDLINE, CINAHL and Global Health databases using a tailored search strategy  
11 (Appendix 2) to identify all the relevant titles and abstracts of studies (randomised control trials,  
12 cohort, cross-sectional and case-control studies) published in English from inception of the database  
13 up to the 04<sup>th</sup> of September 2019, that reported predictive/prognostic scores or models that could be  
14 used in the management of malaria. These included:  
15  
16  
17

- 18 - Scores/models that predicted the severity of disease as this could guide clinicians' decisions  
19 to admit for intensive care management or the use of parenteral treatment;  
20
- 21 - Scores/models that predicted the potential development of complications (including coma or  
22 cerebral malaria; shock; acidosis; severe anaemia; acute kidney injury; hypoglycaemia;  
23 respiratory failure and sepsis);  
24
- 25 - Scores/models that predicted mortality in patients with malaria infection.  
26  
27  
28

29 The main keywords in the search strategy included: "prognostic model/score", "predictive  
30 model/score" and "predictive value of tests" coupled with "malaria", "plasmodium", "anti-malarials",  
31 "malaria falciparum", "malaria vivax" and "clinical malaria". We further canvassed the references of  
32 eligible papers to identify similar papers for review.  
33  
34  
35

36 We excluded any duplicate studies, editorials, systematic reviews, case studies, conference abstracts,  
37 unpublished studies and expert commentaries. For studies with more than one publication of findings,  
38 we selected the most recent publication.  
39  
40

41 We also excluded studies which contained models or scores that were aimed at the diagnosis of  
42 malaria as we intend to limit the scope of the review to only models that could be used to predict  
43 severity, mortality or risk of complications – that could guide clinicians in their management options.  
44 Studies that used animal models to predict disease severity were also excluded.  
45  
46  
47

48 Two independent reviewers (TN and BST) screened the titles and abstracts for compliance to the  
49 aforementioned inclusion and exclusion criteria and any conflicts were settled by mutual agreement.  
50 Articles considered to have data relevant to the topic were assessed in detail and the references cited  
51 in these publications were searched to identify further publications.  
52  
53  
54

### 55 **Data extraction**

56  
57 Data extraction sheets which were prepared prior to screening were used by the two independent  
58 reviewers to obtain the following details for inclusion into the final review: Last name of first author;  
59  
60



1  
2  
3 date of publication; period of patient recruitment and/or follow-up; country of study; sample size; age  
4 group; type of predictive model; name of model; method of internal validation (calibration and  
5 discrimination); diagnostic properties of model and evidence of external validation or use in clinical  
6 settings.  
7  
8  
9

## 10 **Definitions**

11  
12 By prognostic/predictive model, we mean a statistical tool which uses at least 2 points (or variables) of  
13 patient data to predict a specific clinical outcome <sup>9</sup>. Prognostic models applied in clinical settings are  
14 usually used at the discretion of physicians for accurate future predictions based on characteristics  
15 gathered in the present <sup>9 10</sup>. The information found in prognostic models is usually specific to the  
16 patients' characteristics rather than the disease or treatment and includes: prediction of chance or the  
17 duration of survival; classification of patients into risk groups; and prediction of clinical events related  
18 to the treatment the patient is receiving <sup>11</sup>.  
19  
20  
21  
22  
23

24 For models that used the area under the curve (AUC) or c-statistic to assess discrimination, the following  
25 classification was used: 0.90 - 1 – excellent; 0.80 - 0.90 – good; 0.70 - 0.80 – fair; 0.60 - 0.70 – poor  
26 and 0.50 - 0.60 – very poor discriminative properties <sup>12</sup>.  
27  
28  
29

## 30 **Data synthesis and analysis**

31 We assessed and discussed the selected studies qualitatively to describe the diagnostic properties of  
32 the models proposed in the study, their intended purpose and evidence of use of the model in other  
33 clinical settings.  
34  
35  
36

37 We further divided the models into various categories: models used to predict a potential complication  
38 of severe malaria; models used to predict mortality as an outcome and models used to predict severity  
39 of malaria infection.  
40  
41  
42

## 43 **Assessment of risk of bias and applicability**

44 The risk of bias and applicability of the models in the various studies were assessed by the two  
45 independent reviewers using the Prediction model Risk Of Bias Assessment Tool (PROBAST) <sup>13 14</sup>  
46 (Appendix 3). Any disagreements were handled by mutual agreement.  
47  
48  
49

## 50 **Patient and public involvement:**

51 Patients and the public were not involved in the design and conduction of this review.  
52  
53  
54  
55

## 56 **Results**

1  
2  
3 A total of 564 articles were identified by the electronic search of the databases. The titles and  
4 abstracts of these articles were screened to retain 59 articles for full text review. These were then  
5 evaluated according to the inclusion criteria and 24 articles were identified describing 27  
6 models/scores of interests; after eliminating 23 irrelevant articles, 9 articles which used only one  
7 variable to predict an outcome and two articles describing models in other languages (Figure 1).

8  
9  
10  
11 Two of the articles described models predicting complications of malaria<sup>8 15</sup>; fifteen described  
12 original models predicting mortality in severe malaria<sup>16-30</sup>; three described models predicting  
13 mortality in different contexts but adapted and validated to predict mortality in malaria<sup>31-33</sup>; and four  
14 articles described models predicting severity of the disease<sup>34-37</sup>. One of the articles described three  
15 models to predict mortality paediatric severe malaria<sup>31</sup>, while another described two models to predict  
16 mortality in adult severe malaria<sup>24</sup>. The rest of the articles described one model each.

17  
18  
19  
20  
21 Using the PROBAST to assess risk of bias and applicability, none of the studies had a low risk of bias  
22 while six studies were not found to be applicable in real-life settings<sup>15 16 22 34-36</sup> (Appendix 3).

23  
24  
25  
26  
27 The general characteristics of the studies included in the review are summarised in Tables 1, 2, 3 and  
28 4.

### 29 **Models predicting the risk of complications in malaria infection**

30  
31  
32 Webber *et al*<sup>15</sup> in 1997 conducted a study to predict the risk of severe anaemia (packed cell volume <  
33 15%) in children with severe malaria in the Gambia using logistic regression analysis. This model was  
34 not internally validated, and the two predictors identified were pallor of the conjunctiva and pallor of  
35 the palms. There is no evidence from this review that the model has been externally validated and is  
36 being used in clinical settings.

37  
38  
39  
40  
41 In 2018, Njim *et al*<sup>8</sup> described a prognostic model for clinical use to predict the risk of sepsis  
42 development amongst adult patients (> 16 years old) admitted for severe falciparum malaria in  
43 Southeast Asia. They used data from SEQUAMAT (South East Asian Quinine Artesunate Malaria  
44 Trial) – a large randomised control trial (RCT) conducted to determine the benefits of intravenous  
45 artesunate over quinine treatment for severe malaria. They used a multivariable logistic regression  
46 approach with internal validation using bootstrapping to generate a prognostic model with modest  
47 discriminative abilities [area under the curve (AUC): 0.789] containing the following predictive  
48 variables: female sex, high blood urea nitrogen, high plasma anion gap, respiratory distress, shock on  
49 admission, high parasitaemia, coma and jaundice. The model has not been externally validated and  
50 there is no evidence of use in clinical settings.

### 51 **Models predicting mortality in severe malaria**

#### 52 ***Models predicting mortality in paediatric severe malaria***

1  
2  
3 Ten articles described models that predicted mortality in paediatric severe malaria <sup>16 20-23 27 28 30-32</sup>.

4 Three articles described models which predicted mortality in paediatric patients with cerebral malaria  
5 <sup>16 21 27</sup>; two articles described models generated to assess mortality in different conditions that were  
6 validated for use in the present studies <sup>31 32</sup>; and five articles described original models predicting the  
7 risk of mortality in children with severe malaria <sup>20 22 23 28 30</sup>.

### 11 ***Models predicting mortality in paediatric cerebral malaria***

12 Molyneux *et al* <sup>27</sup> in 1989 conducted a study amongst 131 comatose Malawian children with severe  
13 cerebral malaria to determine the prognostic factors for death in these patients. The authors derived a  
14 “bedside prognostic index” with: blood glucose  $\leq 2.2$  mmol/L; parasitaemia  $> 106$  ring forms/ $\mu$ L;  
15 white blood cell count  $> 15 \times 10^9$ /L; age  $\leq 3$  years; coma score (modification of the Glasgow coma  
16 score) = 0; absent corneal reflexes; signs of decerebration and convulsions; as predictors of mortality  
17 with each predictor assigned a score of 1. Individuals with a score  $\geq 4$  were more likely to die. This  
18 score was calculated only using univariable analysis and internal and external validation were not  
19 done.

20  
21  
22 In 1997 in Gambia, Jaffar *et al* <sup>21</sup> performed a retrospective analysis on data obtained from a  
23 randomised control trial during which artemether was compared with quinine and a monoclonal  
24 antibody against tumour necrosis factor (TNF) compared with a placebo in patients with cerebral  
25 malaria. They used this data to identify predictors of mortality in cerebral malaria using a  
26 multivariable logistic regression model. A cold periphery, a coma score of either 0 or 1 (assessed  
27 using the Blantyre coma scale measured on a scale of 0 – 5), and hypoglycaemia were found to be  
28 present at admission in 90% of the children who died. This model was not internally validated.

29  
30  
31 Conroy *et al* <sup>16</sup> in 2012 conducted a study amongst 155 children aged 8 months – 14 years in Malawi  
32 to determine predictors of mortality in cerebral malaria. They used a multivariable logistic regression  
33 model containing clinical parameters and biomarkers with a modest discriminative ability (C-index of  
34 0.79) after internal validation; which contained the following variables: age, Blantyre coma score,  
35 respiratory distress, severe anaemia, angiopoietin-1, angiopoietin-2 and sTie-2 levels. The model was  
36 not externally validated.

### 37 ***Original models predicting mortality in paediatric severe malaria***

38  
39  
40 Krishna *et al* <sup>22</sup> in 1994 conducted a study in the Gambia to predict mortality in children aged 8  
41 months to 14 years. They used a multivariable logistic regression model internally validated using the  
42 Wald statistic to determine that the coma score (using the Blantyre coma scale), whole blood  
43 lactate/glucose ratio and TNF level were the best predictors of death.

44  
45  
46 In 1995, Marsh *et al* <sup>23</sup> studied 1844 children in Kenya to determine predictors of life-threatening  
47 malaria (risk of death) using a multivariable logistic regression model. They determined that impaired  
48  
49  
50  
51  
52  
53  
54  
55  
56  
57  
58  
59  
60

consciousness (assessed using the Blantyre coma scale), hypoglycaemia, respiratory distress and jaundice could correctly predict 84.4% of deaths in the sample population. The model was not validated internally or externally.

In 2005, Newton *et al*<sup>28</sup> conducted a study to assess the prognostic value of measures of acid/base balance in paediatric falciparum malaria. They examined 14,605 children in Malawi (Blantyre), Kenya (Kilifi) and Ghana (Kumasi); where they determined that deep breathing, Blantyre Coma Score, inability to sit, and weight-for-age Z score were independent predictors of mortality in all the three sites. Discrimination of the model was performed by calculating the area under the receiver operating curve (AUROC). After addition of laboratory data to these models – hypoglycaemia, base excess and lactate concentrations; the c-statistics obtained were 0.88 (Blantyre), 0.87 (Kilifi) and 0.83 (Kumasi) denoting good discriminative properties of the models.

Helbok *et al*<sup>20</sup> in 2009 produced the the Lambarene Organ Dysfunction Score (LODS) which combined three variables: coma, prostration, and deep breathing to generate a model using multivariable logistic regression which predicted death in African children – Banjul (Gambia), Blantyre (Malawi), Kilifi (Kenya), Kumasi (Ghana), and Lambarene and Libreville (Gabon); who were admitted for severe falciparum malaria. Each component of the model was assigned a score of 1 and a LODS of 3 at admission had a 98% specificity and 25% sensitivity in predicting death. Meanwhile a LODS  $\geq 1$  had a sensitivity of 85% and a specificity of 63%. The model had good discriminative properties with an AUC of 0.80 (95% CI: 0.79 – 0.82). In 2015, Conroy *et al*<sup>31</sup> externally validated this model amongst 1589 Ugandan children. The model showed good discriminative properties with an AUC of 0.898.

Similarly, in 2012, von Seidlein *et al*<sup>30</sup> conducted an analysis of data from a RCT carried out in several African countries (Gambia, Mozambique, Nigeria, Rwanda, Kenya, DRC, Tanzania, Ghana and Uganda) to generate a model for predicting mortality from severe falciparum malaria using multivariable logistic regression analysis and internally validated by AUROC analysis. After analysis of data from 5426 children, base deficit, impaired consciousness (assessed using the Blantyre Coma Score), convulsions, elevated blood urea, and underlying chronic illness were identified in the model to predict mortality with a good discriminative ability – AUROC: 0.85 (95% CI: 0.83 - 0.87).

### ***Existing Models validated for use in the prediction of mortality in severe malaria in children***

As described above, Conroy *et al*<sup>31</sup> externally validated the LODS model amongst 1589 Ugandan children. The authors further externally validated two other scores: the SICK (Signs of Inflammation in Children that Kill) score which was developed in India as a practical triage tool using variables related to the systemic inflammatory response syndrome, with data collected from 1,099 children in 2003 admitted for any paediatric illness<sup>38</sup>; and the PEDIA (Pediatric Early Death Index for Africa) score which was developed to predict early death amongst 8091 children in Kenya in 2003 admitted

1  
2  
3 for paediatric illnesses<sup>39</sup>. The original SICK score containing the following variables: altered  
4 consciousness, temperature, heart rate, respiratory rate, systolic blood pressure, capillary refill time  
5 and age; had good discriminative properties with an AUC of 0.887<sup>38</sup>. Externally validated against this  
6 cohort of 1589 children, the score maintained its good discriminative properties with an AUC of  
7 0.846. Similarly, the PEDIA score which originally had excellent discriminative properties with an  
8 AUC of 0.93<sup>39</sup> had good discriminative properties (AUC: 0.896) when externally validated on the  
9 cohort of 1589 Ugandan children<sup>31</sup>. The original PEDIA score contained Kwashiorkor, jaundice,  
10 subcostal indrawing, prostration ( $\pm$  seizures) and wasting as variables in the model. However,  
11 kwashiorkor was not included in the validation model as it was not measured amongst the Ugandan  
12 children.  
13  
14  
15  
16  
17  
18

19 In 2006, Gerardin *et al*<sup>32</sup> externally validated the PRISM (Pediatric Risk of Mortality) model which  
20 was originally developed in 1988 by Pollack *et al*<sup>40</sup> to reduce the number of physiologic variables  
21 required for paediatric intensive care unit death risk assessment. The model was developed from data  
22 of 1,227 patients with 105 deaths and contained 14 variables: systolic blood pressure, temperature,  
23 mental status, heart rate, dilatation of pupils, pH, total CO<sub>2</sub>, PCO<sub>2</sub>, arterial PaO<sub>2</sub>, serum glucose,  
24 potassium, urea, creatinine, white blood cells, prothrombin time, platelet count. The original score had  
25 excellent discriminative properties with an AUC of 0.92<sup>40</sup>. Gerardin *et al* used a cohort of 311  
26 Senegalese children admitted with severe malaria to externally validate this model. The model  
27 showed good discriminative properties in predicting death in children with severe malaria – AUC:  
28 0.86 (95% CI: 0.81– 0.90)<sup>32</sup>.  
29  
30  
31  
32  
33  
34  
35

### 36 **Models predicting mortality in adult severe malaria**

37  
38 There were eight articles assessing models that predicted mortality in adult severe malaria<sup>17-19 24-26 28</sup>  
39  
40  
41

42 In 1995, Wilairatana *et al*<sup>41</sup> used the APACHE II score (the acute physiology and chronic health  
43 evaluation system score commonly used in intensive care units) based on 12 physiologic variables –  
44 Mean arterial pressure (MAP), temperature, heart rate, respiratory rate, arterial pH, PaO<sub>2</sub>,  
45 haematocrit, WBC count, creatinine, sodium, potassium and Glasgow coma score to predict the risk  
46 of mortality in adult patients with cerebral malaria in Thailand. The score was able to predict  
47 mortality with a 95.8% accuracy. The original APACHE II model was produced in 1985 by Knaus *et*  
48 *al*<sup>42</sup>, and clinical judgement and physiologic relationships were used to assign weightings for the  
49 various factors in the model.  
50  
51  
52  
53  
54

55 Dondorp *et al*<sup>17</sup> in 2004 created a model using logistic regression with laboratory data from 268  
56 patients in Vietnam to determine the risk of mortality in adult patients with severe malaria. This  
57 model had a good discriminative value with an AUROC of 0.81. The laboratory variables associated  
58 with mortality in this cohort were: plasma lactate, plasma creatinine and a strong anion gap. On the  
59  
60

1  
2  
3 other hand, in 2007, Mishra *et al*<sup>24</sup> created the MSA (Malaria score for adults) and the MPS (Malaria  
4 prediction score) from a cohort of 212 patients in India to predict mortality in severe malaria. The  
5 MSA was an upgrade of the Malaria prognostic index (MPI) which required laboratory data and  
6 included a small proportion of children. The clinical variables included in the MSA were: severe  
7 anaemia, acute renal failure, respiratory distress and cerebral malaria and had a sensitivity of 89.9%  
8 and a specificity of 70.6%. This model was externally validated by Santos *et al*<sup>43</sup> among 59 patients  
9 with imported severe malaria in Portugal and was shown to have good discriminative properties –  
10 AUROC: 0.84; 95% CI: 0.70 – 0.98.  
11  
12

13  
14  
15  
16 Similarly, Hanson *et al*<sup>18</sup> produced the coma acidosis malaria (CAM) score after using a logistic  
17 regression analysis on data previously collected from the SEQUAMAT. The authors proposed the use  
18 of the presence of a coma and base deficit to calculate a five-point score to predict mortality. The  
19 score had good discriminative properties with an AUROC of 0.81 (95% CI: 0.77 – 0.84). The same  
20 author used data from several cohort studies and RCTs carried out in Bangladesh, India, Indonesia,  
21 Vietnam and Myanmar to predict 48-hour survival and survival to discharge in patients with severe  
22 malaria<sup>19</sup>. The model containing the variables: shock, oligo-anuria, dysglycaemia, respiratory rate,  
23 Glasgow coma score and fever could correctly predict 48 hour-survival in 99.4% of the patients and  
24 survival to discharge in 96.9% of patients.  
25  
26  
27  
28  
29  
30

31  
32 Mohapatra *et al*<sup>26</sup> in 2009 carried out a cohort study of 2089 patients in 2009, where they produced  
33 the Malaria severity score (MSS) to predict mortality in adult patients with severe falciparum malaria  
34 in India. They assessed seven organ systems: neurologic, renal, haematologic, hepatic, respiratory,  
35 cardiovascular, and metabolic organ systems; assigning a maximum score of 0 – 3 for each organ  
36 system. The model had excellent discriminative properties with an AUROC of 0.9. The authors also  
37 developed the GCRBS (Glasgow coma scale, creatinine, respiratory rate, bilirubin and systolic BP)  
38 score in 2014 as an alternative to other scores like the APACHE II score which was considered  
39 cumbersome<sup>25</sup>. The score had a sensitivity of 85.3% and a specificity of 95.6% in predicting a fatal  
40 outcome in severe malaria.  
41  
42  
43  
44  
45

46  
47 In 2013 in Thailand, Newton *et al*<sup>29</sup> conducted a retrospective analysis of 988 records with severe  
48 falciparum malaria to produce the MPI (Malaria prognostic index) validated using ROC curve  
49 analysis and internal validation by data splitting. The MPI contained the following variables: Glasgow  
50 coma scale, parasitaemia, plasma lactate, serum bilirubin, pigmented parasites and treatment with  
51 ACT and had excellent discriminative properties with an AUROC of 0.97.  
52  
53  
54

### 55 **Models predicting the severity of malaria**

56  
57 The Multi-organ dysfunction score (MODS) which is an index used in severely ill patients admitted in  
58 intensive care units to determine the severity of their disease irrespective of the diagnosis<sup>34,44</sup>. The  
59 score evaluates ten organ systems: heart, blood vessel, blood, respiratory system, metabolism,  
60



1  
2  
3 gastrointestinal system, liver, kidney and urinary tract, immune system, and central nervous system –  
4 giving a score of 1 – 5 for each system depending on the level of dysfunction of the system, with a  
5 minimum score of 10 and a maximum score of 50<sup>35</sup>. Helbok *et al* assessed the use of this score to  
6 predict severity in a small cohort (n = 22) of adult patients with uncomplicated falciparum malaria<sup>35</sup>  
7 and in adults with severe malaria (n = 29)<sup>34</sup> in Thailand. The score was not internally validated in  
8 both studies but the authors showed that higher scores were correlated with symptom severity and  
9 duration of hospitalisation. In 2006, the authors used a simplified version of the score - Simplified  
10 MODS (sMODS); in a cohort of 485 children in Gabon to predict the level of severity of the disease  
11 with respect to the amount of disability the children suffered into categories: ability to walk unaided  
12 and ability to sit unaided<sup>36</sup>. The authors obtained an AUC of 0.92 (95% CI: 0.89, 0.95) in predicting  
13 inability to walk  $\geq$  48 hours for children with sMODS  $\geq$  16 and an AUC of 0.90 (95% CI: 0.87, 0.93)  
14 in predicting inability to sit unaided (Table 4).

15  
16  
17  
18  
19  
20  
21  
22  
23 Grigg *et al* in 2018, used a multivariable logistic regression model to predict the severity of  
24 *Plasmodium knowlesi* malaria infection in a cohort of 481 participants in Malaysia. The authors  
25 showed that independent predictors of disease severity using the WHO 2014 research criteria<sup>45</sup> were:  
26 increasing age, abdominal pain, shortness of breath, increasing parasite count, schizont proportion  
27  $>10\%$  and serum bicarbonate levels  $<18$  mmol. The model was not internally or externally validated  
28 (Table 4).

## 32 33 34 35 **Discussion:**

36  
37 In this review, we report on the various prognostic models and scores produced to predict complications,  
38 mortality and severity of malaria infection. We showed that there were two models produced to predict  
39 the risk of developing complications from malaria infection, twelve models that predict mortality from  
40 severe malaria in children, nine models that predict mortality from severe malaria in adults and four  
41 models that predict disease severity in malaria. Seventeen of these models were internally validated  
42 while only seven have been externally validated. There is no published evidence that any of these  
43 models are routinely used in clinical settings.

44  
45  
46  
47  
48  
49 The models identified in this review that were used to predict mortality in children with severe malaria  
50 have similar clinical predictors. All the models had neurologic dysfunction based on either the Glasgow  
51 coma score, impaired consciousness, altered mental status, convulsions, decerebration or coma as a  
52 predictor. Similarly, in adults, all the models predicting mortality also had neurologic dysfunction as a  
53 predictor. Microvascular obstruction in capillaries of the brain due to direct sequestration of red blood  
54 cells infected with the malaria parasite could lead to tissue hypoxia<sup>46</sup>. The effects of this sequestration  
55 and its sequelae in the brain can be directly visualised in both adults and children as retinopathy<sup>16 46-48</sup>.  
56  
57  
58  
59  
60 This leads to varied results with increased intracranial pressure more pronounced in children than in

adults<sup>46</sup>. With the increased oxygen demand associated with brain hypoxia and raised intracranial pressure, coma and brain dysfunction could therefore become an important predictor of mortality.

In children, half of the models predicting mortality had hypoglycaemia as a predictor<sup>21-23 27 28 32</sup>. Hypoglycaemia is usually implicated as a complication of severe malaria infection. This association has been said to be multifactorial<sup>49</sup>. Proposed mechanisms for this association include: increased glucose use by the malaria parasites in the red blood cells, inhibition of gluconeogenesis by the cascade of cytokines released due to infection and prolonged starvation and fasting especially in severely ill children further compounds the problem<sup>49 50</sup>. Considering that glucose is the primary source for organs like the brain which is likely suffering from the above highlighted effects of microvascular obstruction and sequestration; depleted glucose sources could lead to neurologic dysfunction including seizures, deepening comas and hence death. As above, any factor that significantly affects neurologic dysfunction could be highly predictive of mortality or disease severity in patients.

Half of the models in children predicting mortality had respiratory distress (including deep breathing and subcostal indrawing) as a predictor<sup>16 20 23 28 31</sup>. Meanwhile six out of the nine models in adults had respiratory failure as a clinical predictor of mortality<sup>19 24 26 41</sup>. The incidence of respiratory distress in severe malaria is quite common as it occurs in about 40% of children with severe falciparum malaria and in 25% of adults<sup>51</sup>. It results from acute respiratory distress syndrome (ARDS); metabolic acidosis; fluid overload possibly resulting from increased inflammatory related capillary permeability and endothelial damage<sup>8 51</sup>; and aspiration pneumonia which could lead to sepsis<sup>8</sup> – a common association with severe malaria. The high mortality rates (up to 87% in some cases) associated with respiratory failure like in ARDS<sup>52</sup> could explain the predictive significance of respiratory distress in predicting mortality in malaria infection. Respiratory failure usually leads to hypoxia and a high probability of acute mortality in patients.

Acidosis was also a prominent predictor of mortality in most of the models predicting mortality. It was present in three of the models predicting mortality in children<sup>28 30 32</sup> and five models predicting mortality in adults<sup>17 18 26 29 41</sup>. Acidosis usually results from underlying pathologies like respiratory distress, renal failure and shock. These three variables were also common variables in the models predicting mortality in both children and adults identified in this review. Renal failure expressed in these models either as acute renal failure, oligoanuria or estimates of the kidney function using serum urea and creatinine<sup>17 19 24-26 30 32 41</sup>; is due to acute tubular necrosis that occurs in severe malaria infection as a direct result of microvascular obstruction of capillaries by infected red blood cells leading to the release of inflammatory cytokines like tumor necrosis factor<sup>53</sup>. Similarly, shock expressed either as a function of the systolic blood pressure or cold peripheries in three models in children<sup>21 31 32</sup> and likewise in two models in adults<sup>19 41</sup> could result from peripheral vasodilation which may usually occur concomitantly with sepsis and is a marker of a poor prognosis<sup>8 54 55</sup>.



1  
2  
3 From the above, factors that were predictive of disease severity and mortality seemed to be consistent  
4 amongst these studies. The factors that should therefore be considered by physicians when faced with  
5 a patient with malaria infection should include: neurologic dysfunction (coma and seizures), acidosis,  
6 hypoglycaemia and respiratory distress (Figure 2). These factors seem to be highly predictive of  
7 mortality and disease severity in most of the articles that were included in the review and should  
8 therefore be included in any future studies attempting to predict these outcomes in malaria (Table 5).  
9  
10  
11  
12

13 We found evidence of external validation in only seven of the models identified in this study<sup>18 20 24 31</sup>  
14<sup>32</sup>. External validation is an important component as it determines the generalisability of the model and  
15 its potential use in different geographical regions<sup>56</sup>. As outlined above, most of the models have similar  
16 variables highlighting the fact that the predictors of complications, severity and mortality in malaria  
17 might be consistent across different settings. Emphasis could therefore be better placed in the validation  
18 of existing models and initiating their use in clinical settings to guide clinicians on prioritising patients  
19 and anticipating outcomes. Publication of the findings on the use of these models in clinical settings  
20 should also be encouraged to guide clinicians on which models work better in various settings.  
21  
22  
23  
24  
25

26 After assessment of the risk of bias of the various models, eighteen of the studies contained models that  
27 used variables that could be readily available and hence were applicable in real-life settings. However,  
28 all the models had a high risk of bias. This was primarily due to the lack of internal validation in several  
29 of the studies or the lack of use of up-to-date methods of validation. Caution should therefore be used  
30 when interpreting and using the results from the articles.  
31  
32  
33  
34

35 This review has some limitations. The search included only articles that were published in English. This  
36 could potentially lead to the exclusion of studies and models that could otherwise have been included  
37 in the review.  
38  
39

#### 40 **Conclusion:**

41  
42 Models predicting severity and mortality of malaria infection identified in this review have similar  
43 predictors. Evidence is however lacking on the generalisability of most of these models due lack of  
44 external validation. Emphasis should therefore be placed on external validation of existing models and  
45 publication of the findings of their use in clinical settings to guide clinicians on management options  
46 depending on the priorities of their patients.  
47  
48  
49

#### 50 **Abbreviations:**

51 APACHE: acute physiology and chronic health evaluation system; AUC: area under the curve;  
52 AUROC: area under the receiver operating curve; CAM: coma acidosis malaria; GCRBS: Glasgow  
53 coma scale, creatinine, respiratory rate, bilirubin and systolic BP; ICU: intensive care units; IQR:  
54 Interquartile range; LODS: Lambarene Organ Dysfunction Score; MODS: Multi-organ dysfunction  
55 score; MPI: Malaria Prognostic index; MPS: Malaria prediction score; MSA: Malaria score for adults;  
56  
57  
58  
59  
60

1  
2  
3 MSS: Malaria severity score; PEDIA: Pediatric Early Death Index for Africa; PRISM: Pediatric Risk  
4 of Mortality; PRISMA: Preferred Reporting Items for Systematic Reviews and Meta-Analysis; RCT:  
5 randomised control trial; SEQUAMAT: South East Asian Quinine Artesunate Malaria Trial; SICK:  
6 Signs of Inflammation in Children that Kill; sMODS: Simplified MODS; TNF: tumour necrosis  
7 factor; WHO: World Health Organisation  
8  
9  
10

## 11 **Declarations**

12  
13  
14 ***Ethics approval and consent to participate:*** Not applicable  
15

16  
17 ***Consent for publication:*** Not applicable  
18

19 ***Availability of data and material:*** All data relevant to the study are included in the article or uploaded  
20 as supplementary information  
21

22  
23 ***Competing interests:*** The authors declare no competing interests  
24

25 ***Funding:*** No external funding was used in carrying out this review.  
26

27 ***Authors' contributions:*** Conception: TN; independent reviews of papers: TN & BST; writing of  
28 initial draft: TN; manuscript revisions: TN & BST.  
29

30  
31 ***Acknowledgements:*** None.  
32  
33  
34  
35  
36  
37  
38  
39  
40  
41  
42  
43  
44  
45  
46  
47  
48  
49  
50  
51  
52  
53  
54  
55  
56  
57  
58  
59  
60

Table 1: Summary of articles with models predicting complications in severe malaria

| N                               | Authors             | Year | Period of participant recruitment | Country                                  | Type of study            | Sample size | Statistics used     | Name of model | Method internal of validation | Age profiles                                | Sex profiles   | Outcome predicted                                                              | Variables used                                                                                                               | Diagnostic properties                                | External validation | Use in clinical settings |
|---------------------------------|---------------------|------|-----------------------------------|------------------------------------------|--------------------------|-------------|---------------------|---------------|-------------------------------|---------------------------------------------|----------------|--------------------------------------------------------------------------------|------------------------------------------------------------------------------------------------------------------------------|------------------------------------------------------|---------------------|--------------------------|
| <b>Complications of malaria</b> |                     |      |                                   |                                          |                          |             |                     |               |                               |                                             |                |                                                                                |                                                                                                                              |                                                      |                     |                          |
| <b>Severe anaemia</b>           |                     |      |                                   |                                          |                          |             |                     |               |                               |                                             |                |                                                                                |                                                                                                                              |                                                      |                     |                          |
| 1                               | Weber <sup>15</sup> | 1997 | July – December 1994              | Gambia                                   | Cohort                   | 368         | Logistic regression | None          | None                          | Median age: 28 months (IQR: 14 – 48 months) | Females – 49%  | Paediatric development of severe anaemia in malaria (packed cell volume < 15%) | Pallor of conjunctiva and pallor of palms                                                                                    | Sensitivity of 80% and a specificity of 85%.         | None                | NE                       |
| <b>Development of sepsis</b>    |                     |      |                                   |                                          |                          |             |                     |               |                               |                                             |                |                                                                                |                                                                                                                              |                                                      |                     |                          |
| 2                               | Njim <sup>s</sup>   | 2018 | June 2003 – May 2005              | Bangladesh, India, Indonesia and Myanmar | Randomised Control Trial | 1187        | Logistic regression | None          | Bootstrapping                 | 17 – 87 years                               | Female – 24.3% | Development of clinical sepsis in adults with severe falciparum malaria        | Sex, blood urea nitrogen levels, plasma anion gap, respiratory distress, shock on admission, parasitaemia, coma and jaundice | AUC: 0.789. Sensitivity – 70.0%; specificity – 69.4% | None                | NE                       |

\* not used in present model; BCS: Blantyre coma score; NC: not clear; NE: No evidence; <sup>a</sup> diagnostic properties of original model; IQR: interquartile range; RCT: randomised control trial; ACT: artemisinin combined therapy; DRC: Democratic Republic of the Congo; BUN: blood urea nitrogen; TNF: tissue necrotic factor

Table 2: Summary of articles with models predicting mortality in paediatric severe malaria

| N | Authors | Year | Period of participant recruitment | Country | Type of study | Sample size | Statistics used | Name of model | Method internal of validation | Age profiles | Sex profiles | Outcome predicted | Variables used | Diagnostic properties | External validation | Use in clinical settings |
|---|---------|------|-----------------------------------|---------|---------------|-------------|-----------------|---------------|-------------------------------|--------------|--------------|-------------------|----------------|-----------------------|---------------------|--------------------------|
|---|---------|------|-----------------------------------|---------|---------------|-------------|-----------------|---------------|-------------------------------|--------------|--------------|-------------------|----------------|-----------------------|---------------------|--------------------------|

| Mortality |                        |      |                              |                         |                                                                |       |                      |                          |                                      |                          |                    |                                             |                                                                                                                  |                                                                                 |      |    |
|-----------|------------------------|------|------------------------------|-------------------------|----------------------------------------------------------------|-------|----------------------|--------------------------|--------------------------------------|--------------------------|--------------------|---------------------------------------------|------------------------------------------------------------------------------------------------------------------|---------------------------------------------------------------------------------|------|----|
| 1         | Jaffar <sup>21</sup>   | 1997 | 1992 – 1994                  | Gambia                  | Retrospective analysis of data from a randomised control trial | 624   | Logistic regression  | None                     | None                                 | 1 – 9.5 years            | Females – 49%      | Mortality in paediatric cerebral malaria    | Cold periphery, deep coma and hypoglycaemia                                                                      | Not done                                                                        | None | NE |
| 2         | Molyneux <sup>27</sup> | 1989 | January 1987 – June 1988     | Malawi                  | Cohort                                                         | 131   | Univariable analysis | Bedside prognostic index | None                                 | 7 months – 10 years      | Females – 55.7%    | Mortality in paediatric cerebral malaria    | Blood glucose, parasitaemia, WBC count, age, coma score, absent corneal reflexes, decerebration, convulsions     | Positive predictive value – 83%, sensitivity – 66%                              | None | NE |
| 3         | Conroy <sup>16</sup>   | 2012 | 1997 – 2009                  | Malawi                  | Cohort                                                         | 155   | Logistic regression  | None                     | Hosmer-Lemeshow goodness-of-fit test | 8 months – 14 years      | Females – 54.4%    | Mortality in patients with cerebral malaria | Age, Blantyre coma score, respiratory distress, severe anaemia, angiopoietin-1, angiopoietin-2 and sTie-2 levels | C-index of 0.79 (95% CI 0.72 – 0.84)                                            | None | NE |
| 4         | Krishna <sup>22</sup>  | 1994 | 1988 – 1989                  | Gambia                  | Cohort study                                                   | 115   | Logistic regression  | None                     | Wald statistic and ROC analysis      | 18 months – 12 years     | NC                 | Mortality in paediatric severe malaria      | Coma score, whole blood lactate/glucose ratio, TNF level                                                         | Wald statistic: coma score (4.5), lactate/glucose ratio (8.36), TNF level (6.5) | None | NE |
| 5         | Marsh <sup>23</sup>    | 1995 | May 1989 – November 1991     | Kenya                   | Cohort                                                         | 1844  | Logistic regression  | None                     | None                                 | Mean: 26 months          | NC                 | Mortality in children with severe malaria   | Impaired consciousness, respiratory distress, hypoglycemia, and jaundice                                         | Predicted 92.2% of deaths                                                       | None | NE |
| 6         | Newton <sup>28</sup>   | 2005 | January 2001 – December 2003 | Malawi, Kenya and Ghana | Cohort                                                         | 14605 | Linear regression    | None                     | AUROC                                | Mean age: 32 – 36 months | Females – 53 – 55% | Mortality in paediatric severe falciparum   | Deep breathing, Blantyre Coma Score, inability to sit, weight-                                                   | C-statistic 0.83 – 0.88 in the three sites: Blantyre (0.88), Kilifi             | None | NE |

|    |                            |      |                                  |                                                                          |                        |       |                     |                                                             |                                                 |                                     |                     |                                                      |                                                                                                                                                                                                                                                                   |                                                                                                      |      |    |
|----|----------------------------|------|----------------------------------|--------------------------------------------------------------------------|------------------------|-------|---------------------|-------------------------------------------------------------|-------------------------------------------------|-------------------------------------|---------------------|------------------------------------------------------|-------------------------------------------------------------------------------------------------------------------------------------------------------------------------------------------------------------------------------------------------------------------|------------------------------------------------------------------------------------------------------|------|----|
|    |                            |      |                                  |                                                                          |                        |       |                     |                                                             |                                                 |                                     |                     | malaria                                              | for-age Z score, hypoglycaemia, base excess and lactate concentration                                                                                                                                                                                             | (0.87) and Kumasi (0.83)                                                                             |      |    |
| 7  | Gérardin <sup>32</sup>     | 2006 | October 1, 1997 – March 31, 1999 | Senegal                                                                  | Cohort                 | 311   | Logistic regression | PRISM (Pediatric Risk of Mortality) AUC: 0.92 <sup>40</sup> | Hosmer-Lemeshow chi-square test                 | Median: 8 years (IQR: 5 – 11 years) | Females – 40.5%     | Mortality in children with falciparum malaria        | Systolic blood pressure, temperature, mental status, heart rate, dilatation of pupils, pH, total CO <sub>2</sub> , PCO <sub>2</sub> , arterial PaO <sub>2</sub> , serum glucose, potassium, urea, creatinine, white blood cells, prothrombin time, platelet count | AUROC for acute malaria: 0.89 (95% CI: 0.85 – 0.92) and 0.86 (95% CI: 0.81– 0.90) for severe malaria | Yes  | NE |
| 8  | Helbok <sup>20</sup>       | 2009 | December 2000 – May 2005         | Gambia, Malawi, Kenya, Ghana, and Gabon                                  | Cohort                 | 23890 | Logistic regression | LODS (Lambaréné Organ Dysfunction Score)                    | Internal validation using Bonferroni correction | Mean: 30 – 38 months                | Females – 41% – 47% | Mortality in children with severe falciparum malaria | Coma, prostration and deep breathing                                                                                                                                                                                                                              | AUROC: 80.80 (0.79 – 0.82)                                                                           | Yes  | NE |
| 9  | von Seidlein <sup>30</sup> | 2012 | 2005 - 2010                      | Gambia, Mozambique, Nigeria, Rwanda, Kenya, DRC, Tanzania, Ghana, Uganda | Retrospective analysis | 5426  | Logistic regression | None                                                        | ROC analysis                                    | Median: 2.8 years (1.7, 4.3)        | NC                  | Mortality in paediatric severe falciparum malaria    | Base deficit, coma, convulsions, BUN and chronic illness                                                                                                                                                                                                          | AUROC: 0.85 (95% CI: 0.83 - 0.87)                                                                    | None | NE |
| 10 | Conroy <sup>31</sup>       | 2015 | NC                               | Uganda                                                                   | Cohort                 | 1589  | Logistic regression | SICK (Signs of Inflammation in Children)                    | Hosmer-Lemeshow goodness of fit                 | NC                                  | Females – 54.3%     | Mortality in malaria                                 | Altered consciousness, temperature, heart rate, respiratory                                                                                                                                                                                                       | AUROC – 0.846                                                                                        | Yes  | NE |



|   |                         |      |                             |                                          |                                                      |      |                                                                                     |                                   |                                                                   |               |                 |                                                            |                                                                                                                |                                                                                                 |                   |    |
|---|-------------------------|------|-----------------------------|------------------------------------------|------------------------------------------------------|------|-------------------------------------------------------------------------------------|-----------------------------------|-------------------------------------------------------------------|---------------|-----------------|------------------------------------------------------------|----------------------------------------------------------------------------------------------------------------|-------------------------------------------------------------------------------------------------|-------------------|----|
|   |                         |      |                             |                                          |                                                      |      | II score use clinical judgement and physiologic relationships to assign weightings) |                                   |                                                                   |               |                 | falciparum malaria                                         | haematocrit, WBC count, creatinine, sodium, potassium and Glasgow coma score                                   |                                                                                                 |                   |    |
| 2 | Dondorp <sup>17</sup>   | 2004 | NC                          | Vietnam                                  | Cohort                                               | 268  | Logistic regression                                                                 | None                              | Hosmer-Lemeshow goodness-of-fit test                              | 15 – 79 years | Females – 19%   | Mortality in adults with severe falciparum malaria         | Plasma lactate, plasma strong anion gap and plasma creatinine                                                  | AUROC: 0.81                                                                                     | None              | NE |
| 3 | Mishra <sup>24</sup>    | 2007 | NC                          | India                                    | Cohort                                               | 212  | Linear regression                                                                   | MSA (Malaria score for adults)    | Not done                                                          | NC            | NC              | Mortality in adults with severe malaria                    | severe anaemia, acute renal failure, respiratory distress, cerebral malaria                                    | Sensitivity : 89.9%, specificity : 70.6%, positive predictive value: 94.1% with cut-off of 5/10 | Yes <sup>43</sup> | NE |
|   |                         |      |                             |                                          |                                                      |      |                                                                                     | MPS (Malaria prediction score)    | Not done                                                          | NC            | NC              | Mortality in severe malaria                                | Age, serum creatinine level, haemoglobin level, cerebral malaria, presence of a pregnancy, use of a ventilator | NE                                                                                              | Yes <sup>43</sup> | NE |
| 4 | Hanson <sup>18</sup>    | 2010 | June 2003 – May 2005        | Bangladesh, India, Indonesia and Myanmar | Retrospective analysis of a randomised control trial | 789  | Logistic regression                                                                 | CAM (coma acidosis malaria) score | Hosmer-Lemeshow goodness-of-fit                                   | NC            | NC              | Mortality in adults with severe malaria                    | Coma and acidosis (base deficit)                                                                               | AUROC: 0.81 (95% CI: 0.77 – 0.84)                                                               | Yes <sup>59</sup> | NE |
| 5 | Mohapatra <sup>26</sup> | 2009 | January 200 – December 2004 | India                                    | Cohort study                                         | 2089 | Logistic regression                                                                 | MSS (Malaria severity score)      | Hosmer-Lemeshow goodness-of-fit (internal validation by splitting | 18 – 71 years | Females – 34.6% | Mortality in adult patients with severe falciparum malaria | neurologic, renal, haematologic, hepatic, respiratory, cardiovascular, and metabolic organ systems             | AUROC: 0.9                                                                                      | None              | NE |

|   |                         |      |             |                                                   |                                              |      |                     |                                                                            |                                                              |                         |                |                                                                            |                                                                                                               |                                                                                                                  |      |    |
|---|-------------------------|------|-------------|---------------------------------------------------|----------------------------------------------|------|---------------------|----------------------------------------------------------------------------|--------------------------------------------------------------|-------------------------|----------------|----------------------------------------------------------------------------|---------------------------------------------------------------------------------------------------------------|------------------------------------------------------------------------------------------------------------------|------|----|
|   |                         |      |             |                                                   |                                              |      |                     |                                                                            | data – 2089 vs 509)                                          |                         |                |                                                                            |                                                                                                               |                                                                                                                  |      |    |
| 6 | Newton <sup>29</sup>    | 2013 | 1986 – 2002 | Thailand                                          | Retrospective analysis                       | 988  | Logistic regression | MPI (Malaria prognostic index)                                             | ROC curve analysis and internal validation by data splitting | 15 – 74 years           | Females – 43%  | Mortality in adult severe falciparum malaria                               | Glasgow coma scale, parasitaemia, plasma lactate, serum bilirubin, pigmented parasites and treatment with ACT | AUROC: 0.97                                                                                                      | None | NE |
| 7 | Mohapatra <sup>25</sup> | 2014 | NC          | India                                             | Cohort                                       | 112  | NC                  | GCBRS (GCS, creatinine, respiratory rate, bilirubin and systolic BP) score | NC                                                           | Mean: 35.8 ± 15.1 years | Females – 16.1 | Mortality in severe falciparum malaria                                     | Cerebral malaria, renal failure, respiratory distress, jaundice and shock                                     | Sensitivity : 85.3%. Specificity : 95.6%                                                                         | None | NE |
| 8 | Hanson <sup>19</sup>    | 2014 | 1996 – 2013 | Bangladesh, India, Indonesia, Vietnam and Myanmar | Randomised control trials and cohort studies | 1801 | Logistic regression | None                                                                       | Hosmer-Lemeshow goodness-of-fit                              | 21 – 45                 | Females – 24.4 | 48-hour survival and survival to discharge in patients with severe malaria | Shock, oligoanuria, dysglycaemia, respiratory rate, Glasgow Coma Score and absence of fever                   | PPV for 48 hour-survival: 99.4% (95% CI 97.8 – 99.9). PPV for survival to discharge: 96.9% (95% CI: 94.3 – 98.5) | None | NE |

\* not used in present model; BCS: Blantyre coma score; NC: not clear; NE: No evidence; <sup>a</sup> diagnostic properties of original model; IQR: interquartile range; RCT: randomised control trial; ACT: artemisinin combined therapy; DRC: Democratic Republic of the Congo; BUN: blood urea nitrogen; TNF: tissue necrotic factor

**Table 4: Summary of articles with models predicting severity of malaria infection**



| N                          | Authors              | Year | Period of participant recruitment  | Country  | Type of study | Sample size | Statistics used   | Name of model                                      | Method internal of validation | Age profiles            | Sex profiles   | Outcome predicted                                                                       | Variables used                                                                                                                                                                       | Diagnostic properties                                                  | External validation | Use in clinical settings |
|----------------------------|----------------------|------|------------------------------------|----------|---------------|-------------|-------------------|----------------------------------------------------|-------------------------------|-------------------------|----------------|-----------------------------------------------------------------------------------------|--------------------------------------------------------------------------------------------------------------------------------------------------------------------------------------|------------------------------------------------------------------------|---------------------|--------------------------|
| <b>Severity of disease</b> |                      |      |                                    |          |               |             |                   |                                                    |                               |                         |                |                                                                                         |                                                                                                                                                                                      |                                                                        |                     |                          |
| 1                          | Helbok <sup>35</sup> | 2003 | October 1, 2001 – January 30, 2002 | Thailand | Cohort        | 22          | NC                | MODS (Multi-organ dysfunction score) <sup>44</sup> | None                          | 16 – 41 years           | Female – 41.8% | Severity of disease in adult patients with uncomplicated falciparum malaria             | Ten organ systems: (heart, blood vessel, blood, respiratory system, metabolism, gastrointestinal system, liver, kidney and urinary tract, immune system, and central nervous system) | None                                                                   | None                | NE                       |
| 2                          | Helbok <sup>34</sup> | 2005 | October 1, 2001 – July 30, 2002    | Thailand | Cohort        | 29          | Survival analysis | MODS <sup>44</sup>                                 | None                          | Mean age: 27.1 (± 10.6) | Female – 27.6% | Severity of disease in adult patients with severe falciparum malaria                    | Ten organ systems: (heart, blood vessel, blood, respiratory system, metabolism, gastrointestinal system, liver, kidney and urinary tract, immune system, and central nervous system) | None                                                                   | None                | NE                       |
| 3                          | Helbok <sup>36</sup> | 2006 | August 2003 – May 2005             | Gabon    | Cohort        | 485         | Survival analysis | Simplified MODS <sup>35</sup>                      | ROC analysis                  | 4 months – 169 months   | Females – 49%  | Severity of disease and disability in children with severe falciparum malaria infection | Ten organ systems: (heart, blood vessel, blood, respiratory system, metabolism, gastrointestinal system, liver,                                                                      | AUC to predict prolonged disease (>48 hours unable to walk): 0.92 (95% | None                | NE                       |

|   |                     |      |                           |          |        |                                              |                     |      |      |                         |                |                                                                                                 |                                                                                                                        |                 |      |    |
|---|---------------------|------|---------------------------|----------|--------|----------------------------------------------|---------------------|------|------|-------------------------|----------------|-------------------------------------------------------------------------------------------------|------------------------------------------------------------------------------------------------------------------------|-----------------|------|----|
|   |                     |      |                           |          |        |                                              |                     |      |      |                         |                |                                                                                                 | kidney and urinary tract, immune system, and central nervous system)                                                   | CI, 0.89–0.95). |      |    |
| 4 | Grigg <sup>37</sup> | 2018 | October 2012 – April 2016 | Malaysia | Cohort | 481 patients with <i>Plasmodium knowlesi</i> | Logistic regression | None | None | 33 years (IQR: 21 – 49) | Female – 43.2% | Severity of <i>Plasmodium knowlesi</i> infection using WHO 2014 research criteria <sup>45</sup> | Age >45, abdominal pain, shortness of breath, increased parasite count, schizont proportion >10%, Bicarbonate <18 mmol | None            | None | NE |

\* not used in present model; BCS: Blantyre coma score; NC: not clear; NE: No evidence; <sup>a</sup> diagnostic properties of original model; IQR: interquartile range; RCT: randomised control trial; ACT: artemisinin combined therapy; DRC: Democratic Republic of the Congo; BUN: blood urea nitrogen; TNF: tissue necrotic factor; WHO: World Health Organisation; IQR: Interquartile range

**Table 5: Findings of review, research gaps and potential for future research**

| Findings of review                                                                                                                                  | Research gaps                                             | Potential for future research | Other possible avenues                                                                                                                                                           |
|-----------------------------------------------------------------------------------------------------------------------------------------------------|-----------------------------------------------------------|-------------------------------|----------------------------------------------------------------------------------------------------------------------------------------------------------------------------------|
| Several models available to predict various outcomes in severe malaria.                                                                             |                                                           |                               | Incorporation of produced models into artificial intelligence to help in the fast prediction of risks of adverse outcomes and suggestions of treatment and management modalities |
| Variables consistent in predicting disease severity, mortality and complications include: neurologic dysfunction, respiratory distress and acidosis | Models that take into consideration these major variables | Studies with robust designs   |                                                                                                                                                                                  |

1  
2  
3  
4  
5  
6  
7  
8  
9  
10  
11  
12  
13  
14  
15  
16  
17  
18  
19  
20  
21  
22  
23  
24  
25  
26  
27  
28  
29  
30  
31  
32  
33  
34  
35  
36  
37  
38  
39  
40  
41  
42  
43  
44  
45  
46

|                                                                                                    |                                                                                          |                                                                                                        |  |
|----------------------------------------------------------------------------------------------------|------------------------------------------------------------------------------------------|--------------------------------------------------------------------------------------------------------|--|
| Most models have high risk of bias due to lack of use of up to date methods of internal validation | Models without risk of bias that use adequate statistical methods of internal validation | Internal validation and wide external validation to help integrate models into daily clinical practice |  |
|----------------------------------------------------------------------------------------------------|------------------------------------------------------------------------------------------|--------------------------------------------------------------------------------------------------------|--|

For peer review only

## References

1. White NJ, Pukrittayakamee S, Hien TT, et al. Malaria. *Lancet* 2014;383(9918):723-35. doi: 10.1016/S0140-6736(13)60024-0 [published Online First: 2013/08/21]
2. Tanner M, Greenwood B, Whitty CJ, et al. Malaria eradication and elimination: views on how to translate a vision into reality. *BMC Med* 2015;13:167. doi: 10.1186/s12916-015-0384-6 [published Online First: 2015/07/26]
3. World Health Organisation. Achieving the malaria MDG target: reversing the incidence of malaria 2000-2015. Geneva, 2015.
4. World Health Organisation. Malaria 2019 [Available from: <https://www.who.int/news-room/fact-sheets/detail/malaria> accessed 04/09/2019.
5. World Health Organisation. World Malaria Report. Geneva: World Health Organisation, 2016.
6. A single agenda needed for malaria. *Lancet Infect Dis* 2003;3(6):317. [published Online First: 2003/06/05]
7. Day N, Dondorp AM. The management of patients with severe malaria. *Am J Trop Med Hyg* 2007;77(6 Suppl):29-35. [published Online First: 2008/01/31]
8. Njim T, Dondorp A, Mukaka M, et al. Identifying risk factors for the development of sepsis during adult severe malaria. *Malaria Journal* 2018;17(1):278-78. doi: 10.1186/s12936-018-2430-2
9. Perel P, Edwards P, Wentz R, et al. Systematic review of prognostic models in traumatic brain injury. *BMC Med Inform Decis Mak* 2006;6:38. doi: 10.1186/1472-6947-6-38
10. Vogenberg FR. Predictive and prognostic models: implications for healthcare decision-making in a modern recession. *Am Health Drug Benefits* 2009;2(6):218-22.
11. Cook NR. Statistical evaluation of prognostic versus diagnostic models: beyond the ROC curve. *Clin Chem* 2008;54(1):17-23. doi: 10.1373/clinchem.2007.096529
12. Mehdi T, Bashardoost N, Ahmadi M. Kernel Smoothing For ROC Curve And Estimation For Thyroid Stimulating Hormone. *International Journal of Public Health Research* 2011(Special issue 2011):239-42.
13. Moons KGM, Wolff RF, Riley RD, et al. PROBAST: A Tool to Assess Risk of Bias and Applicability of Prediction Model Studies: Explanation and Elaboration. *Ann Intern Med* 2019;170(1):W1-W33. doi: 10.7326/M18-1377 [published Online First: 2019/01/01]
14. Wolff RF, Moons KGM, Riley RD, et al. PROBAST: A Tool to Assess the Risk of Bias and Applicability of Prediction Model Studies. *Ann Intern Med* 2019;170(1):51-58. doi: 10.7326/M18-1376 [published Online First: 2019/01/01]
15. Weber MW, Kellingray SD, Palmer A, et al. Pallor as a clinical sign of severe anaemia in children: an investigation in the Gambia. *Bulletin Of The World Health Organization* 1997;75 Suppl 1:113-18.
16. Conroy AL, Glover SJ, Hawkes M, et al. Angiopoietin-2 levels are associated with retinopathy and predict mortality in Malawian children with cerebral malaria: a retrospective case-control study\*. *Critical Care Medicine* 2012;40(3):952-59. doi: 10.1097/CCM.0b013e3182373157
17. Dondorp AM, Chau TTH, Phu NH, et al. Unidentified acids of strong prognostic significance in severe malaria. *Critical Care Medicine* 2004;32(8):1683-88.
18. Hanson J, Lee SJ, Mohanty S, et al. A simple score to predict the outcome of severe malaria in adults. *Clin Infect Dis* 2010;50(5):679-85. doi: 10.1086/649928 [published Online First: 2010/01/29]
19. Hanson J, Lee SJ, Mohanty S, et al. Rapid clinical assessment to facilitate the triage of adults with falciparum malaria, a retrospective analysis. *PLoS One* 2014;9(1):e87020. doi: 10.1371/journal.pone.0087020 [published Online First: 2014/02/04]

- 1
  - 2
  - 3
  - 4
  - 5
  - 6
  - 7
  - 8
  - 9
  - 10
  - 11
  - 12
  - 13
  - 14
  - 15
  - 16
  - 17
  - 18
  - 19
  - 20
  - 21
  - 22
  - 23
  - 24
  - 25
  - 26
  - 27
  - 28
  - 29
  - 30
  - 31
  - 32
  - 33
  - 34
  - 35
  - 36
  - 37
  - 38
  - 39
  - 40
  - 41
  - 42
  - 43
  - 44
  - 45
  - 46
  - 47
  - 48
  - 49
  - 50
  - 51
  - 52
  - 53
  - 54
  - 55
  - 56
  - 57
  - 58
  - 59
  - 60
20. Helbok R, Kendjo E, Issifou S, et al. The Lambarene Organ Dysfunction Score (LODS) is a simple clinical predictor of fatal malaria in African children. *J Infect Dis* 2009;200(12):1834-41. doi: 10.1086/648409 [published Online First: 2009/11/17]
21. Jaffar S, Van Hensbroek MB, Palmer A, et al. Predictors of a fatal outcome following childhood cerebral malaria. *Am J Trop Med Hyg* 1997;57(1):20-4. [published Online First: 1997/07/01]
22. Krishna S, Waller DW, ter Kuile F, et al. Lactic acidosis and hypoglycaemia in children with severe malaria: pathophysiological and prognostic significance. *Trans R Soc Trop Med Hyg* 1994;88(1):67-73. [published Online First: 1994/01/01]
23. Marsh K, Forster D, Waruiru C, et al. Indicators of life-threatening malaria in African children. *N Engl J Med* 1995;332(21):1399-404. doi: 10.1056/NEJM199505253322102 [published Online First: 1995/05/25]
24. Mishra SK, Panigrahi P, Mishra R, et al. Prediction of outcome in adults with severe falciparum malaria: a new scoring system. *Malaria Journal* 2007;6:24-24.
25. Mohapatra BN, Jangid SK, Mohanty R. GCRBS score: a new scoring system for predicting outcome in severe falciparum malaria. *Journal Of The Association Of Physicians Of India* 2014;62
26. Mohapatra MK, Das SP. The malaria severity score: a method for severity assessment and risk prediction of hospital mortality for falciparum malaria in adults. *The Journal Of The Association Of Physicians Of India* 2009;57:119-26.
27. Molyneux ME, Taylor TE, Wirima JJ, et al. Clinical features and prognostic indicators in paediatric cerebral malaria: a study of 131 comatose Malawian children. *Q J Med* 1989;71(265):441-59. [published Online First: 1989/05/01]
28. Newton CRJC, Valim C, Krishna S, et al. The prognostic value of measures of acid/base balance in pediatric falciparum malaria, compared with other clinical and laboratory parameters. *Clinical Infectious Diseases: An Official Publication Of The Infectious Diseases Society Of America* 2005;41(7):948-57.
29. Newton PN, Stepniewska K, Dondorp A, et al. Prognostic indicators in adults hospitalized with falciparum malaria in Western Thailand. *Malar J* 2013;12:229. doi: 10.1186/1475-2875-12-229 [published Online First: 2013/07/09]
30. von Seidlein L, Olaosebikan R, Hendriksen IC, et al. Predicting the clinical outcome of severe falciparum malaria in african children: findings from a large randomized trial. *Clin Infect Dis* 2012;54(8):1080-90. doi: 10.1093/cid/cis034 [published Online First: 2012/03/14]
31. Conroy AL, Hawkes M, Hayford K, et al. Prospective validation of pediatric disease severity scores to predict mortality in Ugandan children presenting with malaria and non-malaria febrile illness. *Critical Care (London, England)* 2015;19:47-47. doi: 10.1186/s13054-015-0773-4
32. Gérardin P, Rogier C, Leteurtre S, et al. Evaluation of Pediatric Risk of Mortality (PRISM) scoring in African children with falciparum malaria. *Pediatric Critical Care Medicine: A Journal Of The Society Of Critical Care Medicine And The World Federation Of Pediatric Intensive And Critical Care Societies* 2006;7(1):45-47.
33. Khoo KL, Tan WL, Eng P, et al. Malaria requiring intensive care. *Annals Of The Academy Of Medicine, Singapore* 1998;27(3):353-57.
34. Helbok R, Dent W, Nacher M, et al. The use of the multi-organ-dysfunction score to discriminate different levels of severity in severe and complicated Plasmodium falciparum malaria. *Am J Trop Med Hyg* 2005;72(2):150-4. [published Online First: 2005/03/03]
35. Helbok R, Dent W, Nacher M, et al. Use of the multi-organ dysfunction score as a tool to discriminate different levels of severity in uncomplicated Plasmodium falciparum malaria. *Am J Trop Med Hyg* 2003;68(3):372-5. [published Online First: 2003/04/11]
36. Helbok R, Issifou S, Matsiegui PB, et al. Simplified multi-organ dysfunction score predicts disability in African children with Plasmodium falciparum malaria. *Am J Trop Med Hyg* 2006;75(3):443-7. [published Online First: 2006/09/14]

- 1  
2  
3 37. Grigg MJ, William T, Barber BE, et al. Age-Related Clinical Spectrum of Plasmodium knowlesi  
4 Malaria and Predictors of Severity. *Clinical Infectious Diseases* 2018;67(3):350-59. doi:  
5 10.1093/cid/ciy065  
6  
7 38. Kumar N, Thomas N, Singhal D, et al. Triage score for severity of illness. *Indian Pediatr*  
8 2003;40(3):204-10. [published Online First: 2003/03/27]  
9  
10 39. Berkley JA, Ross A, Mwangi I, et al. Prognostic indicators of early and late death in children  
11 admitted to district hospital in Kenya: cohort study. *BMJ* 2003;326(7385):361. [published  
12 Online First: 2003/02/15]  
13  
14 40. Pollack MM, Ruttimann UE, Getson PR. Pediatric risk of mortality (PRISM) score. *Crit Care Med*  
15 1988;16(11):1110-6. [published Online First: 1988/11/01]  
16  
17 41. Wilairatana P, Looareesuwan S. APACHE II scoring for predicting outcome in cerebral malaria.  
18 *The Journal Of Tropical Medicine And Hygiene* 1995;98(4):256-60.  
19  
20 42. Knaus WA, Draper EA, Wagner DP, et al. APACHE II: a severity of disease classification system.  
21 *Crit Care Med* 1985;13(10):818-29. [published Online First: 1985/10/01]  
22  
23 43. Santos LC, Abreu CF, Xerinda SM, et al. Severe imported malaria in an intensive care unit: a  
24 review of 59 cases. *Malaria Journal* 2012;11:96-96. doi: 10.1186/1475-2875-11-96  
25  
26 44. Weiler T, Baldering HJ, Heinrichs W, et al. [Quality assurance in intensive care medicine. Results  
27 of a multicenter study in Germany]. *Anesthesiol Intensivmed Notfallmed Schmerzther*  
28 1997;32(6):372-5. doi: 10.1055/s-2007-995073 [published Online First: 1997/06/01]  
29  
30 45. World Health Organisation. Severe malaria. *Trop Med Int Health* 2014;19 Suppl 1:7-131. doi:  
31 10.1111/tmi.12313\_2 [published Online First: 2014/09/13]  
32  
33 46. Plewes K, Turner GDH, Dondorp AM. Pathophysiology, clinical presentation, and treatment of  
34 coma and acute kidney injury complicating falciparum malaria. *Curr Opin Infect Dis*  
35 2018;31(1):69-77. doi: 10.1097/QCO.0000000000000419 [published Online First:  
36 2017/12/06]  
37  
38 47. White VA, Lewallen S, Beare N, et al. Correlation of retinal haemorrhages with brain  
39 haemorrhages in children dying of cerebral malaria in Malawi. *Transactions Of The Royal*  
40 *Society Of Tropical Medicine And Hygiene* 2001;95(6):618-21.  
41  
42 48. Lewallen S, Bronzan RN, Beare NA, et al. Using malarial retinopathy to improve the classification  
43 of children with cerebral malaria. *Transactions Of The Royal Society Of Tropical Medicine*  
44 *And Hygiene* 2008;102(11):1089-94. doi: 10.1016/j.trstmh.2008.06.014  
45  
46 49. Ogetii GN, Akech S, Jemutai J, et al. Hypoglycaemia in severe malaria, clinical associations and  
47 relationship to quinine dosage. *BMC Infect Dis* 2010;10:334. doi: 10.1186/1471-2334-10-334  
48 [published Online First: 2010/11/26]  
49  
50 50. Thien HV, Kager PA, Sauerwein HP. Hypoglycemia in falciparum malaria: is fasting an  
51 unrecognized and insufficiently emphasized risk factor? *Trends Parasitol* 2006;22(9):410-5.  
52 doi: 10.1016/j.pt.2006.06.014 [published Online First: 2006/07/15]  
53  
54 51. Taylor WRJ, Hanson J, Turner GDH, et al. Respiratory manifestations of malaria. *Chest*  
55 2012;142(2):492-505. doi: 10.1378/chest.11-2655 [published Online First: 2012/08/09]  
56  
57 52. Maca J, Jor O, Holub M, et al. Past and Present ARDS Mortality Rates: A Systematic Review.  
58 *Respir Care* 2017;62(1):113-22. doi: 10.4187/respcare.04716 [published Online First:  
59 2016/11/03]  
60  
61 53. Duvic C, Rabar D, Didelot F, et al. [Acute renal failure during severe malaria: physiopathology and  
62 therapeutic management. Apropos of 2 cases]. *Med Trop (Mars)* 2000;60(3):267-70.  
63 [published Online First: 2001/03/22]  
64  
65 54. Bruneel F, Gachot B, Timsit JF, et al. Shock complicating severe falciparum malaria in European  
66 adults. *Intensive Care Med* 1997;23(6):698-701. [published Online First: 1997/06/01]  
67  
68 55. Kuethe F, Pfeifer R, Rummeler S, et al. Treatment of a patient with shock complicating severe  
69 falciparum malaria: a case report. *Cases J* 2009;2:6644. doi: 10.1186/1757-1626-0002-  
70 0000006644 [published Online First: 2010/02/26]

- 1  
2  
3 56. Altman DG, Vergouwe Y, Royston P, et al. Prognosis and prognostic research: validating a  
4 prognostic model. *BMJ* 2009;338:b605. doi: 10.1136/bmj.b605 [published Online First:  
5 2009/05/30]  
6  
7 57. Taylor T, Olola C, Valim C, et al. Standardized data collection for multi-center clinical studies of  
8 severe malaria in African children: establishing the SMAC network. *Trans R Soc Trop Med*  
9 *Hyg* 2006;100(7):615-22. doi: 10.1016/j.trstmh.2005.09.021 [published Online First:  
10 2006/03/23]  
11  
12 58. Seneff M, Knaus WA. Predicting patient outcome from intensive care: A guide to APACHE, MPM,  
13 SAPS, PRISM, and other prognostic scoring systems. *Journal of Intensive Care Medicine*  
14 1990;5(1):33-52.  
15  
16 59. Aggarwal HK, Jain D, Rao A, et al. Role of Coma Acidosis Malaria Score in Patients with Severe  
17 Malaria among Indian Population: a Tertiary Care Center Experience. *Eurasian J Med*  
18 2017;49(1):30-35. doi: 10.5152/eurasianjmed.2017.16069 [published Online First:  
19 2017/04/19]  
20  
21  
22

### 23 **Figures Legends:**

24  
25 **Figure 1: Flow chart showing reasons for exclusion of various studies from the review**

26  
27  
28 **Figure 2: Predictive factors of disease severity and mortality in malaria infection**  
29  
30  
31  
32  
33  
34  
35  
36  
37  
38  
39  
40  
41  
42  
43  
44  
45  
46  
47  
48  
49  
50  
51  
52  
53  
54  
55  
56  
57  
58  
59  
60

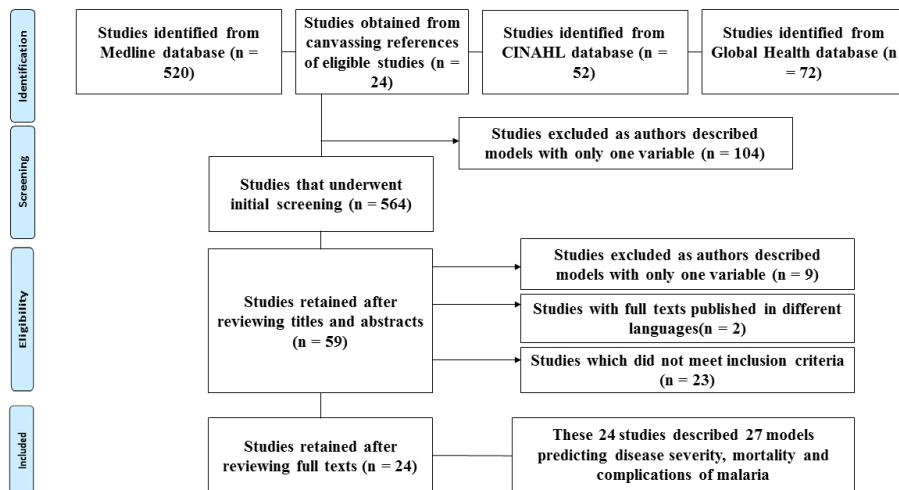

Flow chart showing reasons for exclusion of various studies from the review



1  
2  
3  
4  
5  
6  
7  
8  
9  
10  
11  
12  
13  
14  
15  
16  
17  
18  
19  
20  
21  
22  
23  
24  
25  
26  
27  
28  
29  
30  
31  
32  
33  
34  
35  
36  
37  
38  
39  
40  
41  
42  
43  
44  
45  
46  
47  
48  
49  
50  
51  
52  
53  
54  
55  
56  
57  
58  
59  
60

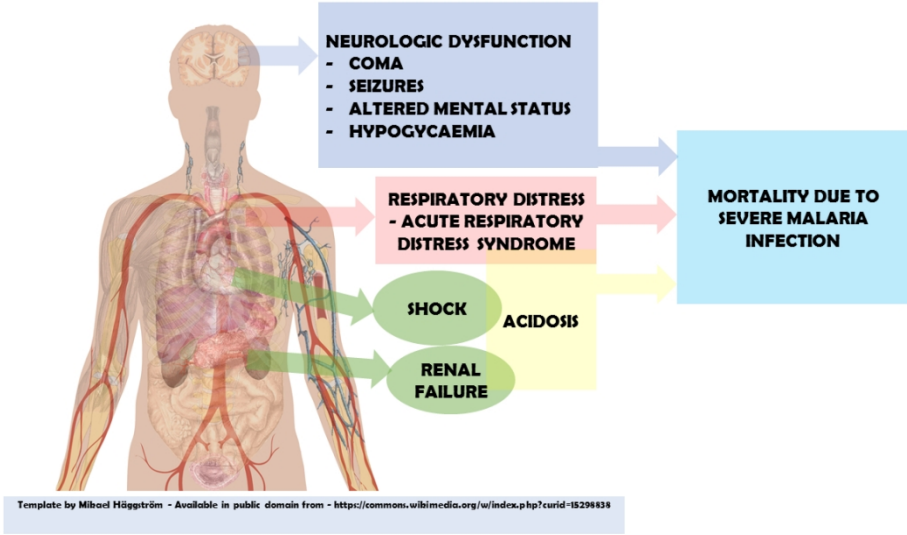

Predictive factors of disease severity and mortality in malaria infection

1  
2  
3 **Appendix 1: PRISMA checklist for systematic reviews and meta-analysis.**  
4  
5

6 **Table 1**

| Section/topic             | #  | Checklist item                                                                                                                                                                                                                                                                                              | Reported on page # |
|---------------------------|----|-------------------------------------------------------------------------------------------------------------------------------------------------------------------------------------------------------------------------------------------------------------------------------------------------------------|--------------------|
| <b>TITLE</b>              |    |                                                                                                                                                                                                                                                                                                             | 1                  |
| Title                     | 1  | Identify the report as a systematic review, meta-analysis, or both.                                                                                                                                                                                                                                         |                    |
| <b>ABSTRACT</b>           |    |                                                                                                                                                                                                                                                                                                             |                    |
| Structured summary        | 2  | Provide a structured summary including, as applicable: background; objectives; data sources; study eligibility criteria, participants, and interventions; study appraisal and synthesis methods; results; limitations; conclusions and implications of key findings; systematic review registration number. | 2                  |
| <b>INTRODUCTION</b>       |    |                                                                                                                                                                                                                                                                                                             |                    |
| Rationale                 | 3  | Describe the rationale for the review in the context of what is already known.                                                                                                                                                                                                                              | 3                  |
| Objectives                | 4  | Provide an explicit statement of questions being addressed with reference to participants, interventions, comparisons, outcomes, and study design (PICOS).                                                                                                                                                  | 3                  |
| <b>METHODS</b>            |    |                                                                                                                                                                                                                                                                                                             |                    |
| Protocol and registration | 5  | Indicate if a review protocol exists, if and where it can be accessed (e.g., Web address), and, if available, provide registration information including registration number.                                                                                                                               | 4                  |
| Eligibility criteria      | 6  | Specify study characteristics (e.g., PICOS, length of follow-up) and report characteristics (e.g., years considered, language, publication status) used as criteria for eligibility, giving rationale.                                                                                                      | 4                  |
| Information sources       | 7  | Describe all information sources (e.g., databases with dates of coverage, contact with study authors to identify additional studies) in the search and date last searched.                                                                                                                                  | 4                  |
| Search                    | 8  | Present full electronic search strategy for at least one database, including any limits used, such that it could be repeated.                                                                                                                                                                               | 4                  |
| Study selection           | 9  | State the process for selecting studies (i.e., screening, eligibility, included in systematic review, and, if applicable, included in the meta-analysis).                                                                                                                                                   | 4                  |
| Data collection process   | 10 | Describe method of data extraction from reports (e.g., piloted forms, independently, in duplicate) and any processes for obtaining and confirming data from investigators.                                                                                                                                  | 5                  |

1  
2  
3  
4  
5  
6  
7  
8  
9  
10  
11  
12  
13  
14  
15  
16  
17  
18  
19  
20  
21  
22  
23  
24  
25  
26  
27  
28  
29  
30  
31  
32  
33  
34  
35  
36  
37  
38  
39  
40  
41  
42  
43  
44  
45  
46

|                                    |    |                                                                                                                                                                                                                        |       |
|------------------------------------|----|------------------------------------------------------------------------------------------------------------------------------------------------------------------------------------------------------------------------|-------|
| Data items                         | 11 | List and define all variables for which data were sought (e.g., PICOS, funding sources) and any assumptions and simplifications made.                                                                                  | 5     |
| Risk of bias in individual studies | 12 | Describe methods used for assessing risk of bias of individual studies (including specification of whether this was done at the study or outcome level), and how this information is to be used in any data synthesis. | 5     |
| Summary measures                   | 13 | State the principal summary measures (e.g., risk ratio, difference in means).                                                                                                                                          | NA    |
| Synthesis of results               | 14 | Describe the methods of handling data and combining results of studies, if done, including measures of consistency (e.g., I <sup>2</sup> ) for each meta-analysis.                                                     | 5     |
|                                    |    |                                                                                                                                                                                                                        |       |
| Risk of bias across studies        | 15 | Specify any assessment of risk of bias that may affect the cumulative evidence (e.g., publication bias, selective reporting within studies).                                                                           | NA    |
| Additional analyses                | 16 | Describe methods of additional analyses (e.g., sensitivity or subgroup analyses, meta-regression), if done, indicating which were pre-specified.                                                                       | NA    |
| <b>RESULTS</b>                     |    |                                                                                                                                                                                                                        |       |
| Study selection                    | 17 | Give numbers of studies screened, assessed for eligibility, and included in the review, with reasons for exclusions at each stage, ideally with a flow diagram.                                                        | 6     |
| Study characteristics              | 18 | For each study, present characteristics for which data were extracted (e.g., study size, PICOS, follow-up period) and provide the citations.                                                                           | 6 -11 |
| Risk of bias within studies        | 19 | Present data on risk of bias of each study and, if available, any outcome level assessment (see item 12).                                                                                                              | 6     |
| Results of individual studies      | 20 | For all outcomes considered (benefits or harms), present, for each study: (a) simple summary data for each intervention group (b) effect estimates and confidence intervals, ideally with a forest plot.               | NA    |
| Synthesis of results               | 21 | Present results of each meta-analysis done, including confidence intervals and measures of consistency.                                                                                                                | NA    |
| Risk of bias across studies        | 22 | Present results of any assessment of risk of bias across studies (see Item 15).                                                                                                                                        | 6     |
| Additional analysis                | 23 | Give results of additional analyses, if done (e.g., sensitivity or subgroup analyses, meta-regression [see Item 16]).                                                                                                  | NA    |
| <b>DISCUSSION</b>                  |    |                                                                                                                                                                                                                        |       |
| Summary of evidence                | 24 | Summarize the main findings including the strength of evidence for each main outcome; consider their relevance to key groups (e.g., healthcare providers, users, and policy makers).                                   | 11    |

|                |    |                                                                                                                                                               |    |
|----------------|----|---------------------------------------------------------------------------------------------------------------------------------------------------------------|----|
| Limitations    | 25 | Discuss limitations at study and outcome level (e.g., risk of bias), and at review-level (e.g., incomplete retrieval of identified research, reporting bias). | 13 |
| Conclusions    | 26 | Provide a general interpretation of the results in the context of other evidence, and implications for future research.                                       | 13 |
| <b>FUNDING</b> |    |                                                                                                                                                               |    |
| Funding        | 27 | Describe sources of funding for the systematic review and other support (e.g., supply of data); role of funders for the systematic review.                    | 14 |

## Appendix 2: Information sources

### *Electronic sources*

**Table 1a: Search strategy for Medline database**

| Searches | Search combinations | Search terms                                                                                                                                                        | Number of hits |
|----------|---------------------|---------------------------------------------------------------------------------------------------------------------------------------------------------------------|----------------|
| S1       |                     | "prognost* model" OR "predict* model" OR "Predictive Value of Tests"                                                                                                | 208,974        |
| S2       |                     | "predict* score" OR "prognos* score"                                                                                                                                | 3,884          |
| S3       | S1 OR S2            |                                                                                                                                                                     | 211,947        |
| S4       |                     | (MH "Malaria+") OR (MH "Malaria, Vivax") OR (MH "Malaria, Cerebral") OR (MH "Malaria, Falciparum+") OR (MH "Malaria, Avian")                                        | 63,536         |
| S5       |                     | "Malaria" OR "vivax malaria" OR "falciparum malaria" OR "cerebral malaria" OR "severe malaria" OR "clinical malaria" OR plasmodium OR antimalaria* OR anti-malaria* | 111,461        |
| S6       | S4 OR S5            |                                                                                                                                                                     | 111,510        |
| S7       | S3 AND S6           |                                                                                                                                                                     | 520            |

**Table 1b: Search strategy for CINAHL database**

| Searches | Search combinations | Search terms                                                                                                                                                        | Number of hits |
|----------|---------------------|---------------------------------------------------------------------------------------------------------------------------------------------------------------------|----------------|
| S1       |                     | "prognost* model" OR "predict* model" OR "Predictive Value of Tests"                                                                                                | 49,434         |
| S2       |                     | "predict* score" OR "prognos* score"                                                                                                                                | 1,041          |
| S3       | S1 OR S2            |                                                                                                                                                                     | 50,217         |
| S4       |                     | (MH "Malaria+")                                                                                                                                                     | 7,468          |
| S5       |                     | "Malaria" OR "vivax malaria" OR "falciparum malaria" OR "cerebral malaria" OR "severe malaria" OR "clinical malaria" OR plasmodium OR antimalaria* OR anti-malaria* | 10,945         |
| S6       | S4 OR S5            |                                                                                                                                                                     | 10,945         |
| S7       | S3 AND S6           |                                                                                                                                                                     | 52             |

**Table 1c: Search strategy for Global Health database**

| Searches | Search combinations | Search terms                                                                                                                                                        | Number of hits |
|----------|---------------------|---------------------------------------------------------------------------------------------------------------------------------------------------------------------|----------------|
| S1       |                     | "prognost* model" OR "predict* model" OR "Predictive Value of Tests"                                                                                                | 2,906          |
| S2       |                     | "predict* score" OR "prognos* score"                                                                                                                                | 368            |
| S3       | S1 OR S2            |                                                                                                                                                                     | 2,906          |
| S4       |                     | "Malaria" OR "vivax malaria" OR "falciparum malaria" OR "cerebral malaria" OR "severe malaria" OR "clinical malaria" OR plasmodium OR antimalaria* OR anti-malaria* | 89,436         |
| S7       | S3 AND S4           |                                                                                                                                                                     | 72             |

1  
2  
3 **Appendix 3: The PROBAST tool used to assess the risk of bias and applicability of the studies used in the review**  
4

5

| Study          | Risk of bias |            |         |          | Applicability |            |         | Overall |               |
|----------------|--------------|------------|---------|----------|---------------|------------|---------|---------|---------------|
|                | Participants | Predictors | Outcome | Analysis | Participants  | Predictors | Outcome | ROB     | Applicability |
| Conroy 2012    | +            | +          | +       | -        | +             | -          | +       | -       | -             |
| Conroy 2015*   | +            | +          | +       | -        | +             | +          | +       | -       | +             |
| Dondorp        | +            | +          | +       | -        | +             | +          | +       | -       | +             |
| Gerardin*      | +            | +          | +       | -        | +             | +          | +       | -       | +             |
| Grigg          | +            | +          | +       | -        | +             | +          | +       | -       | +             |
| Hanson 2010    | +            | +          | +       | -        | +             | +          | +       | -       | +             |
| Hanson 2014    | +            | +          | +       | -        | +             | +          | +       | -       | +             |
| Helbok 2003*   | +            | -          | +       | -        | +             | -          | +       | -       | -             |
| Helbok 2005*   | +            | -          | +       | -        | +             | -          | +       | -       | -             |
| Helbok 2006*   | +            | -          | +       | -        | +             | -          | +       | -       | -             |
| Helbok 2009    | +            | +          | +       | -        | +             | +          | +       | -       | +             |
| Jaffar         | +            | +          | +       | -        | +             | +          | +       | -       | +             |
| Krishna        | +            | +          | +       | -        | +             | -          | +       | -       | -             |
| Marsh          | +            | +          | +       | -        | +             | +          | +       | -       | +             |
| Mishra         | +            | +          | +       | -        | +             | +          | +       | -       | +             |
| Mohapatra 2009 | +            | +          | +       | -        | +             | +          | +       | -       | +             |
| Mohapatra 2014 | +            | +          | +       | -        | +             | +          | +       | -       | +             |
| Molyneux       | +            | +          | +       | -        | +             | +          | +       | -       | +             |
| Newton 2005    | +            | +          | +       | -        | +             | +          | +       | -       | +             |
| Newton 2013    | +            | +          | +       | -        | +             | +          | +       | -       | +             |
| Njim           | +            | +          | +       | -        | +             | +          | +       | -       | +             |
| von Seidlein   | +            | +          | +       | -        | +             | +          | +       | -       | +             |
| Webber         | +            | -          | -       | -        | -             | -          | -       | -       | -             |
| Wilairatana*   | +            | +          | +       | -        | +             | +          | +       | -       | +             |

18  
19  
20  
21  
22  
23  
24  
25  
26  
27  
28  
29  
30  
31 \*Study was designed to externally validate existing models; + indicates low risk of bias/low concern regarding applicability; - indicates high risk of bias/high concern regarding applicability  
32  
33  
34  
35  
36  
37  
38  
39  
40  
41  
42  
43  
44  
45  
46

1  
2  
3  
4  
5  
6  
7  
8  
9  
10  
11  
12  
13  
14  
15  
16  
17  
18  
19  
20  
21  
22  
23  
24  
25  
26  
27  
28  
29  
30  
31  
32  
33  
34  
35  
36  
37  
38  
39  
40  
41  
42  
43  
44  
45  
46  
47  
48  
49  
50  
51  
52  
53  
54  
55  
56  
57  
58  
59  
60

For peer review only

1  
2  
3 **PRISMA checklist for systematic reviews and meta-analysis.**  
4  
5  
6  
7

| Section/topic             | #  | Checklist item                                                                                                                                                                                                                                                                                              | Reported on page # |
|---------------------------|----|-------------------------------------------------------------------------------------------------------------------------------------------------------------------------------------------------------------------------------------------------------------------------------------------------------------|--------------------|
| <b>TITLE</b>              |    |                                                                                                                                                                                                                                                                                                             | 1                  |
| Title                     | 1  | Identify the report as a systematic review, meta-analysis, or both.                                                                                                                                                                                                                                         |                    |
| <b>ABSTRACT</b>           |    |                                                                                                                                                                                                                                                                                                             |                    |
| Structured summary        | 2  | Provide a structured summary including, as applicable: background; objectives; data sources; study eligibility criteria, participants, and interventions; study appraisal and synthesis methods; results; limitations; conclusions and implications of key findings; systematic review registration number. | 2                  |
| <b>INTRODUCTION</b>       |    |                                                                                                                                                                                                                                                                                                             |                    |
| Rationale                 | 3  | Describe the rationale for the review in the context of what is already known.                                                                                                                                                                                                                              | 3                  |
| Objectives                | 4  | Provide an explicit statement of questions being addressed with reference to participants, interventions, comparisons, outcomes, and study design (PICOS).                                                                                                                                                  | 3                  |
| <b>METHODS</b>            |    |                                                                                                                                                                                                                                                                                                             |                    |
| Protocol and registration | 5  | Indicate if a review protocol exists, if and where it can be accessed (e.g., Web address), and, if available, provide registration information including registration number.                                                                                                                               | 4                  |
| Eligibility criteria      | 6  | Specify study characteristics (e.g., PICOS, length of follow-up) and report characteristics (e.g., years considered, language, publication status) used as criteria for eligibility, giving rationale.                                                                                                      | 4                  |
| Information sources       | 7  | Describe all information sources (e.g., databases with dates of coverage, contact with study authors to identify additional studies) in the search and date last searched.                                                                                                                                  | 4                  |
| Search                    | 8  | Present full electronic search strategy for at least one database, including any limits used, such that it could be repeated.                                                                                                                                                                               | 4                  |
| Study selection           | 9  | State the process for selecting studies (i.e., screening, eligibility, included in systematic review, and, if applicable, included in the meta-analysis).                                                                                                                                                   | 4                  |
| Data collection process   | 10 | Describe method of data extraction from reports (e.g., piloted forms, independently, in duplicate) and any processes for obtaining and confirming data from investigators.                                                                                                                                  | 5                  |



|                                    |    |                                                                                                                                                                                                                        |       |
|------------------------------------|----|------------------------------------------------------------------------------------------------------------------------------------------------------------------------------------------------------------------------|-------|
| Data items                         | 11 | List and define all variables for which data were sought (e.g., PICOS, funding sources) and any assumptions and simplifications made.                                                                                  | 5     |
| Risk of bias in individual studies | 12 | Describe methods used for assessing risk of bias of individual studies (including specification of whether this was done at the study or outcome level), and how this information is to be used in any data synthesis. | 5     |
| Summary measures                   | 13 | State the principal summary measures (e.g., risk ratio, difference in means).                                                                                                                                          | NA    |
| Synthesis of results               | 14 | Describe the methods of handling data and combining results of studies, if done, including measures of consistency (e.g., $I^2$ ) for each meta-analysis.                                                              | 5     |
|                                    |    |                                                                                                                                                                                                                        |       |
| Risk of bias across studies        | 15 | Specify any assessment of risk of bias that may affect the cumulative evidence (e.g., publication bias, selective reporting within studies).                                                                           | NA    |
| Additional analyses                | 16 | Describe methods of additional analyses (e.g., sensitivity or subgroup analyses, meta-regression), if done, indicating which were pre-specified.                                                                       | NA    |
| <b>RESULTS</b>                     |    |                                                                                                                                                                                                                        |       |
| Study selection                    | 17 | Give numbers of studies screened, assessed for eligibility, and included in the review, with reasons for exclusions at each stage, ideally with a flow diagram.                                                        | 6     |
| Study characteristics              | 18 | For each study, present characteristics for which data were extracted (e.g., study size, PICOS, follow-up period) and provide the citations.                                                                           | 6 -11 |
| Risk of bias within studies        | 19 | Present data on risk of bias of each study and, if available, any outcome level assessment (see item 12).                                                                                                              | 6     |
| Results of individual studies      | 20 | For all outcomes considered (benefits or harms), present, for each study: (a) simple summary data for each intervention group (b) effect estimates and confidence intervals, ideally with a forest plot.               | NA    |
| Synthesis of results               | 21 | Present results of each meta-analysis done, including confidence intervals and measures of consistency.                                                                                                                | NA    |
| Risk of bias across studies        | 22 | Present results of any assessment of risk of bias across studies (see Item 15).                                                                                                                                        | 6     |
| Additional analysis                | 23 | Give results of additional analyses, if done (e.g., sensitivity or subgroup analyses, meta-regression [see Item 16]).                                                                                                  | NA    |
| <b>DISCUSSION</b>                  |    |                                                                                                                                                                                                                        |       |
| Summary of evidence                | 24 | Summarize the main findings including the strength of evidence for each main outcome; consider their relevance to key groups (e.g., healthcare providers, users, and policy makers).                                   | 11    |

|    |                |    |                                                                                                                                                               |    |
|----|----------------|----|---------------------------------------------------------------------------------------------------------------------------------------------------------------|----|
| 1  |                |    |                                                                                                                                                               |    |
| 2  |                |    |                                                                                                                                                               |    |
| 3  |                |    |                                                                                                                                                               |    |
| 4  | Limitations    | 25 | Discuss limitations at study and outcome level (e.g., risk of bias), and at review-level (e.g., incomplete retrieval of identified research, reporting bias). | 13 |
| 5  |                |    |                                                                                                                                                               |    |
| 6  | Conclusions    | 26 | Provide a general interpretation of the results in the context of other evidence, and implications for future research.                                       | 13 |
| 7  |                |    |                                                                                                                                                               |    |
| 8  | <b>FUNDING</b> |    |                                                                                                                                                               |    |
| 9  | Funding        | 27 | Describe sources of funding for the systematic review and other support (e.g., supply of data); role of funders for the systematic review.                    | 14 |
| 10 |                |    |                                                                                                                                                               |    |
| 11 |                |    |                                                                                                                                                               |    |
| 12 |                |    |                                                                                                                                                               |    |
| 13 |                |    |                                                                                                                                                               |    |
| 14 |                |    |                                                                                                                                                               |    |
| 15 |                |    |                                                                                                                                                               |    |
| 16 |                |    |                                                                                                                                                               |    |
| 17 |                |    |                                                                                                                                                               |    |
| 18 |                |    |                                                                                                                                                               |    |
| 19 |                |    |                                                                                                                                                               |    |
| 20 |                |    |                                                                                                                                                               |    |
| 21 |                |    |                                                                                                                                                               |    |
| 22 |                |    |                                                                                                                                                               |    |
| 23 |                |    |                                                                                                                                                               |    |
| 24 |                |    |                                                                                                                                                               |    |
| 25 |                |    |                                                                                                                                                               |    |
| 26 |                |    |                                                                                                                                                               |    |
| 27 |                |    |                                                                                                                                                               |    |
| 28 |                |    |                                                                                                                                                               |    |
| 29 |                |    |                                                                                                                                                               |    |
| 30 |                |    |                                                                                                                                                               |    |
| 31 |                |    |                                                                                                                                                               |    |
| 32 |                |    |                                                                                                                                                               |    |
| 33 |                |    |                                                                                                                                                               |    |
| 34 |                |    |                                                                                                                                                               |    |
| 35 |                |    |                                                                                                                                                               |    |
| 36 |                |    |                                                                                                                                                               |    |
| 37 |                |    |                                                                                                                                                               |    |
| 38 |                |    |                                                                                                                                                               |    |
| 39 |                |    |                                                                                                                                                               |    |
| 40 |                |    |                                                                                                                                                               |    |
| 41 |                |    |                                                                                                                                                               |    |
| 42 |                |    |                                                                                                                                                               |    |
| 43 |                |    |                                                                                                                                                               |    |
| 44 |                |    |                                                                                                                                                               |    |
| 45 |                |    |                                                                                                                                                               |    |
| 46 |                |    |                                                                                                                                                               |    |
